# Supplementary material
Source: publisher site journal article supplement (https://www.spandidos-publications.com/6285/downloadSupplementary)
Supplement: Supplementary file 1 [file downloadSupplementary]

## Sheet: Sheet 1
Table SX. miRNA microarray technology: screening mirnas that are significantly altered with the reduction of RPL9 protein in exosomes.
probe	symbol	logFC	P-Value	adj.P-Value	CT_1	CT_2	CT_3	SH_1	SH_2	SH_3	accession	Sequence Type	Species Scientific Name	Alignments	Sequence Length	Sequence	Genome Context	Clustered miRNAs within 10kb	Sequence Source
MIMAT0000062_st	hsa-let-7a-5p	0.271898	0.581243	0.992346	1.41714	2.30913	0.990941	1.75384	1.22154	2.55752	MIMAT0000062	miRNA	Homo sapiens	chr11:122017276-122017297 (-) /// chr22:46508632-46508653 (+) /// chr9:96938244-96938265 (+)	22	UGAGGUAGUAGGUUGUAUAGUU	ENST00000362295 // sense // exon // 1 /// ENST00000602703 // sense // intron // 1 /// OTTHUMT00000467752 // sense // intron // 1 /// ENST00000362105 // sense // exon // 1 /// ENST00000360737 // sense // exon // 5 /// OTTHUMT00000316781 // sense // exon // 5	hsa-let-7a-1 // chr9:96938239-96938318 (+) /// hsa-let-7d // chr9:96941116-96941202 (+) /// hsa-let-7f-1 // chr9:96938629-96938715 (+) /// hsa-let-7a-2 // chr11:122017230-122017301 (-) /// hsa-mir-100 // chr11:122022937-122023016 (-) /// hsa-let-7a-3 // chr22:46508629-46508702 (+) /// hsa-let-7b // chr22:46509566-46509648 (+) /// hsa-mir-4763 // chr22:46509446-46509537 (+)	miRBase
MIMAT0000063_st	hsa-let-7b-5p	-0.380729	0.378506	0.992346	5.72086	5.39618	5.12634	5.66004	4.26658	5.17457	MIMAT0000063	miRNA	Homo sapiens	chr22:46509571-46509592 (+)	22	UGAGGUAGUAGGUUGUGUGGUU	ENST00000360737 // sense // exon // 5 /// OTTHUMT00000316781 // sense // exon // 5	hsa-let-7a-3 // chr22:46508629-46508702 (+) /// hsa-let-7b // chr22:46509566-46509648 (+) /// hsa-mir-4763 // chr22:46509446-46509537 (+)	miRBase
MIMAT0000064_st	hsa-let-7c-5p	0.24198	0.578637	0.992346	3.32056	3.36761	2.24753	3.01509	2.87356	3.77299	MIMAT0000064	miRNA	Homo sapiens	chr21:17912158-17912179 (+)	22	UGAGGUAGUAGGUUGUAUGGUU	ENST00000362160 // sense // exon // 1 /// ENST00000400178 // sense // intron // 5 /// ENST00000418813 // sense // intron // 3 /// ENST00000428669 // sense // intron // 5 /// ENST00000441820 // sense // intron // 1 /// ENST00000445461 // sense // intron // 5 /// ENST00000453910 // sense // intron // 3 /// ENST00000456342 // sense // intron // 6 /// ENST00000458468 // sense // intron // 6 /// ENST0…	hsa-let-7c // chr21:17912148-17912231 (+) /// hsa-mir-99a // chr21:17911409-17911489 (+)	miRBase
MIMAT0004484_st	hsa-let-7d-3p	-0.222688	0.410545	0.992346	0.517578	0.841713	0.834783	0.477121	0.52011	0.528779	MIMAT0004484	miRNA	Homo sapiens	chr9:96941177-96941198 (+)	22	CUAUACGACCUGCUGCCUUUCU	ENST00000416309 // antisense // intron // 3 /// ENST00000602602 // antisense // intron // 2 /// ENST00000602703 // sense // intron // 1 /// OTTHUMT00000053172 // antisense // intron // 3 /// OTTHUMT00000467607 // antisense // intron // 2 /// OTTHUMT00000467752 // sense // intron // 1	hsa-let-7a-1 // chr9:96938239-96938318 (+) /// hsa-let-7d // chr9:96941116-96941202 (+) /// hsa-let-7f-1 // chr9:96938629-96938715 (+)	miRBase
MIMAT0000065_st	hsa-let-7d-5p	-0.239959	0.548527	0.992346	3.02116	2.16064	1.89982	1.97944	1.84224	2.54005	MIMAT0000065	miRNA	Homo sapiens	chr9:96941123-96941144 (+)	22	AGAGGUAGUAGGUUGCAUAGUU	ENST00000416309 // antisense // intron // 3 /// ENST00000602602 // antisense // intron // 2 /// ENST00000602703 // sense // intron // 1 /// OTTHUMT00000053172 // antisense // intron // 3 /// OTTHUMT00000467607 // antisense // intron // 2 /// OTTHUMT00000467752 // sense // intron // 1	hsa-let-7a-1 // chr9:96938239-96938318 (+) /// hsa-let-7d // chr9:96941116-96941202 (+) /// hsa-let-7f-1 // chr9:96938629-96938715 (+)	miRBase
MIMAT0000066_st	hsa-let-7e-5p	-0.296504	0.540176	0.992346	1.689	1.68568	0.89009	0.901913	0.458536	2.01481	MIMAT0000066	miRNA	Homo sapiens	chr19:52196046-52196067 (+)	22	UGAGGUAGGAGGUUGUAUAGUU	ENST00000602324 // antisense // exon // 1 /// OTTHUMT00000467329 // antisense // exon // 1	hsa-let-7e // chr19:52196039-52196117 (+) /// hsa-mir-125a // chr19:52196507-52196592 (+) /// hsa-mir-99b // chr19:52195865-52195934 (+)	miRBase
MIMAT0000415_st	hsa-let-7i-5p	-0.156924	0.732247	0.992346	2.33014	2.83658	2.35147	3.28305	1.74885	2.01552	MIMAT0000415	miRNA	Homo sapiens	chr12:62997471-62997492 (+)	22	UGAGGUAGUAGUUUGUGCUGUU	ENST00000362309 // sense // exon // 1 /// ENST00000550290 // sense // intron // 1 /// OTTHUMT00000406740 // antisense // 5UTR // 1 /// OTTHUMT00000406759 // sense // intron // 1	---	miRBase
MIMAT0000098_st	hsa-miR-100-5p	0.0237998	0.952272	0.998769	0.567689	1.86382	1.50755	1.21575	1.57894	1.21575	MIMAT0000098	miRNA	Homo sapiens	chr11:122022983-122023004 (-)	22	AACCCGUAGAUCCGAACUUGUG	---	hsa-let-7a-2 // chr11:122017230-122017301 (-) /// hsa-mir-100 // chr11:122022937-122023016 (-)	miRBase
MIMAT0004513_st	hsa-miR-101-5p	-0.137043	0.777139	0.992346	4.13338	3.94612	5.12824	4.00992	5.0475	3.73919	MIMAT0004513	miRNA	Homo sapiens	chr1:65524160-65524181 (-)	22	CAGUUAUCACAGUGCUGAUGCU	---	hsa-mir-101-1 // chr1:65524117-65524191 (-) /// hsa-mir-3671 // chr1:65523438-65523525 (-)	miRBase
MIMAT0009196_st	hsa-miR-103a-2-5p	0.289322	0.401184	0.992346	0.000821412	0.358479	0.0944136	0.901913	-0.0438676	0.463635	MIMAT0009196	miRNA	Homo sapiens	chr20:3898151-3898173 (+)	23	AGCUUCUUUACAGUGCUGCCUUG	ENST00000316562 // sense // intron // 5 /// ENST00000336066 // sense // intron // 5 /// ENST00000495692 // sense // intron // 5 /// ENST00000497424 // sense // intron // 5 /// OTTHUMT00000077787 // sense // intron // 5 /// OTTHUMT00000077788 // sense // intron // 5 /// OTTHUMT00000077789 // sense // intron // 5 /// OTTHUMT00000077793 // sense // intron // 5	hsa-mir-103a-2 // chr20:3898141-3898218 (+) /// hsa-mir-103b-2 // chr20:3898149-3898210 (-)	miRBase
MIMAT0000101_st	hsa-miR-103a-3p	0.568865	0.26005	0.992346	0.56643	2.02353	1.9749	2.05048	1.67182	2.54916	MIMAT0000101	miRNA	Homo sapiens	chr20:3898188-3898210 (+) /// chr5:167987909-167987931 (-)	23	AGCAGCAUUGUACAGGGCUAUGA	ENST00000316562 // sense // intron // 5 /// ENST00000336066 // sense // intron // 5 /// ENST00000495692 // sense // intron // 5 /// ENST00000497424 // sense // intron // 5 /// OTTHUMT00000077787 // sense // intron // 5 /// OTTHUMT00000077788 // sense // intron // 5 /// OTTHUMT00000077789 // sense // intron // 5 /// OTTHUMT00000077793 // sense // intron // 5 /// ENST00000239231 // sense // intron …	hsa-mir-103a-2 // chr20:3898141-3898218 (+) /// hsa-mir-103b-2 // chr20:3898149-3898210 (-) /// hsa-mir-103a-1 // chr5:167987901-167987978 (-) /// hsa-mir-103b-1 // chr5:167987909-167987970 (+)	miRBase
MIMAT0000103_st	hsa-miR-106a-5p	0.132178	0.754846	0.992346	1.12205	2.02504	2.01762	1.30236	1.81706	2.44182	MIMAT0000103	miRNA	Homo sapiens	chrX:133304274-133304296 (-)	23	AAAAGUGCUUACAGUGCAGGUAG	---	hsa-mir-19b-2 // chrX:133303701-133303796 (-) /// hsa-mir-92a-2 // chrX:133303568-133303642 (-) /// hsa-mir-106a // chrX:133304228-133304308 (-) /// hsa-mir-363 // chrX:133303408-133303482 (-) /// hsa-mir-18b // chrX:133304071-133304141 (-) /// hsa-mir-20b // chrX:133303839-133303907 (-)	miRBase
MIMAT0000104_st	hsa-miR-107	0.291195	0.406685	0.992346	0.813953	1.48968	1.74885	1.85024	1.41435	1.66148	MIMAT0000104	miRNA	Homo sapiens	chr10:91352513-91352535 (-)	23	AGCAGCAUUGUACAGGGCUAUCA	ENST00000307534 // sense // intron // 5 /// ENST00000322191 // sense // intron // 4 /// ENST00000342512 // sense // intron // 5 /// ENST00000362127 // sense // exon // 1 /// ENST00000371774 // sense // intron // 6 /// OTTHUMT00000049317 // sense // intron // 5 /// OTTHUMT00000049318 // sense // intron // 4	---	miRBase
MIMAT0005825_st	hsa-miR-1180-3p	-0.0645803	0.923529	0.998769	6.02796	5.03166	4.00672	5.78421	3.85009	5.23829	MIMAT0005825	miRNA	Homo sapiens	chr17:19247826-19247847 (-)	22	UUUCCGGCUCGCGUGGGUGUGU	ENST00000261499 // sense // intron // 5 /// ENST00000395615 // sense // intron // 5 /// ENST00000395616 // sense // intron // 5 /// ENST00000461069 // sense // intron // 5 /// ENST00000477478 // sense // intron // 5 /// ENST00000575403 // sense // intron // 5 /// ENST00000575478 // sense // intron // 5 /// OTTHUMT00000132494 // sense // intron // 5 /// OTTHUMT00000132495 // sense // intron // 5 /…	---	miRBase
MIMAT0026735_st	hsa-miR-1180-5p	1.44223	0.0424297	0.992346	1.25372	1.35905	1.22349	1.75728	2.25767	4.14799	MIMAT0026735	miRNA	Homo sapiens	chr17:19247861-19247881 (-)	21	GGACCCACCCGGCCGGGAAUA	ENST00000261499 // sense // intron // 5 /// ENST00000395615 // sense // intron // 5 /// ENST00000395616 // sense // intron // 5 /// ENST00000461069 // sense // intron // 5 /// ENST00000477478 // sense // intron // 5 /// ENST00000575403 // sense // intron // 5 /// ENST00000575478 // sense // intron // 5 /// OTTHUMT00000132494 // sense // intron // 5 /// OTTHUMT00000132495 // sense // intron // 5 /…	---	miRBase
MIMAT0005827_st	hsa-miR-1182	-0.211251	0.44441	0.992346	0.796604	0.815305	0.751519	0.445308	0.445308	0.839058	MIMAT0005827	miRNA	Homo sapiens	chr1:231155587-231155609 (-)	23	GAGGGUCUUGGGAGGGAUGUGAC	ENST00000366654 // sense // 3UTR // 2 /// ENST00000466258 // sense // exon // 2 /// ENST00000494111 // sense // exon // 3 /// OTTHUMT00000092652 // sense // 3UTR // 2 /// OTTHUMT00000092653 // sense // exon // 3 /// OTTHUMT00000099227 // sense // exon // 2	---	miRBase
MIMAT0005828_st	hsa-miR-1183	-0.814709	0.213409	0.992346	4.25686	4.12281	3.82567	4.01363	1.78977	3.9578	MIMAT0005828	miRNA	Homo sapiens	chr7:21510723-21510749 (+)	27	CACUGUAGGUGAUGGUGAGAGUGGGCA	ENST00000222584 // sense // intron // 3 /// ENST00000432066 // sense // intron // 1 /// ENST00000448246 // sense // intron // 2 /// OTTHUMT00000211617 // sense // intron // 3 /// OTTHUMT00000326588 // sense // intron // 2 /// OTTHUMT00000326783 // sense // intron // 1	---	miRBase
MIMAT0005829_st	hsa-miR-1184	0.235646	0.73832	0.992346	0.291313	1.22385	2.82693	1.09014	2.54575	1.41313	MIMAT0005829	miRNA	Homo sapiens	chrX:154115651-154115673 (-) /// chrX:154612765-154612787 (-) /// chrX:154687238-154687260 (+)	23	CCUGCAGCGACUUGAUGGCUUCC	ENST00000360256 // sense // intron // 22 /// ENST00000369446 // antisense // 3UTR // 1 /// OTTHUMT00000037637 // antisense // 3UTR // 1 /// OTTHUMT00000058869 // sense // intron // 22 /// ENST00000369505 // antisense // 3UTR // 1 /// OTTHUMT00000082837 // antisense // 3UTR // 1 /// ENST00000369445 // antisense // exon // 1 /// OTTHUMT00000082833 // antisense // exon // 1	---	miRBase
MIMAT0022838_st	hsa-miR-1185-1-3p	0.618096	0.349405	0.992346	0.736139	1.61004	2.56116	1.15877	3.0496	2.55326	MIMAT0022838	miRNA	Homo sapiens	chr14:101509366-101509387 (+)	22	AUAUACAGGGGGAGACUCUUAU	---	hsa-mir-376c // chr14:101506027-101506092 (+) /// hsa-mir-376a-1 // chr14:101507119-101507186 (+) /// hsa-mir-381 // chr14:101512257-101512331 (+) /// hsa-mir-376b // chr14:101506773-101506872 (+) /// hsa-mir-487a // chr14:101518783-101518862 (+) /// hsa-mir-495 // chr14:101500092-101500173 (+) /// hsa-mir-539 // chr14:101513658-101513735 (+) /// hsa-mir-544a // chr14:101514995-101515085 (+) /// …	miRBase
MIMAT0022713_st	hsa-miR-1185-2-3p	0.0400286	0.913304	0.998769	0.876094	1.37167	1.60994	0.784132	1.4831	1.71055	MIMAT0022713	miRNA	Homo sapiens	chr14:101510587-101510608 (+)	22	AUAUACAGGGGGAGACUCUCAU	---	hsa-mir-376c // chr14:101506027-101506092 (+) /// hsa-mir-376a-1 // chr14:101507119-101507186 (+) /// hsa-mir-381 // chr14:101512257-101512331 (+) /// hsa-mir-376b // chr14:101506773-101506872 (+) /// hsa-mir-487a // chr14:101518783-101518862 (+) /// hsa-mir-539 // chr14:101513658-101513735 (+) /// hsa-mir-544a // chr14:101514995-101515085 (+) /// hsa-mir-376a-2 // chr14:101506406-101506485 (+) /…	miRBase
MIMAT0005865_st	hsa-miR-1202	0.0637756	0.904078	0.998769	0.29394	1.97944	2.24753	1.59837	1.57233	1.54153	MIMAT0005865	miRNA	Homo sapiens	chr6:156267943-156267963 (+)	21	GUGCCAGCUGCAGUGGGGGAG	---	---	miRBase
MIMAT0005871_st	hsa-miR-1207-5p	0.0577166	0.84422	0.992346	5.65575	5.90293	6.16388	5.71266	6.00767	6.17538	MIMAT0005871	miRNA	Homo sapiens	chr8:129061405-129061425 (+)	21	UGGCAGGGAGGCUGGGAGGGG	ENST00000512617 // sense // intron // 2 /// ENST00000513868 // sense // intron // 4 /// ENST00000521600 // sense // intron // 2 /// ENST00000522875 // sense // intron // 5 /// ENST00000523190 // sense // intron // 2 /// OTTHUMT00000380704 // sense // intron // 4 /// OTTHUMT00000380708 // sense // intron // 2 /// OTTHUMT00000380709 // sense // intron // 2 /// OTTHUMT00000380710 // sense // intron …	---	miRBase
MIMAT0000421_st	hsa-miR-122-5p	-0.176528	0.671715	0.992346	1.09041	0.895178	0.0219442	0.324551	0.112098	1.0413	MIMAT0000421	miRNA	Homo sapiens	chr18:56118320-56118341 (+)	22	UGGAGUGUGACAAUGGUGUUUG	---	hsa-mir-122 // chr18:56118306-56118390 (+) /// hsa-mir-3591 // chr18:56118312-56118384 (-)	miRBase
MIMAT0005458_st	hsa-miR-1224-5p	-0.729345	0.321233	0.992346	3.67521	3.55944	1.39432	2.72663	1.24246	2.47185	MIMAT0005458	miRNA	Homo sapiens	chr3:183959193-183959211 (+)	19	GUGAGGACUCGGGAGGUGG	ENST00000273794 // sense // intron // 16 /// ENST00000426955 // sense // intron // 18 /// ENST00000444495 // sense // intron // 15 /// ENST00000461141 // sense // intron // 13 /// OTTHUMT00000346004 // sense // intron // 18 /// OTTHUMT00000346005 // sense // intron // 13 /// OTTHUMT00000346009 // sense // intron // 16 /// OTTHUMT00000346333 // sense // intron // 15	---	miRBase
MIMAT0005572_st	hsa-miR-1225-5p	0.387394	0.390072	0.992346	3.11375	3.93582	2.9451	4.43652	3.29696	3.42336	MIMAT0005572	miRNA	Homo sapiens	chr16:2140264-2140285 (-)	22	GUGGGUACGGCCCAGUGGGGGG	ENST00000262304 // sense // intron // 45 /// ENST00000423118 // sense // intron // 45 /// ENST00000472577 // sense // intron // 2 /// OTTHUMT00000341688 // sense // intron // 45 /// OTTHUMT00000341689 // sense // intron // 45 /// OTTHUMT00000341710 // sense // intron // 2	---	miRBase
MIMAT0005576_st	hsa-miR-1226-5p	0.0297562	0.944659	0.998769	1.20936	2.52362	2.18443	1.93008	1.64387	2.43272	MIMAT0005576	miRNA	Homo sapiens	chr3:47891045-47891070 (+)	26	GUGAGGGCAUGCAGGCCUGGAUGGGG	ENST00000348968 // sense // intron // 21 /// ENST00000395745 // sense // intron // 21 /// ENST00000445061 // sense // intron // 20 /// ENST00000446256 // sense // intron // 21 /// ENST00000457607 // sense // intron // 17 /// OTTHUMT00000257495 // sense // intron // 20 /// OTTHUMT00000346135 // sense // intron // 21 /// OTTHUMT00000346137 // sense // intron // 21 /// OTTHUMT00000346139 // sense //…	---	miRBase
MIMAT0022941_st	hsa-miR-1227-5p	-0.440122	0.279038	0.992346	4.12855	5.02253	5.02897	3.83579	4.31348	4.7104	MIMAT0022941	miRNA	Homo sapiens	chr19:2234132-2234148 (-)	17	GUGGGGCCAGGCGGUGG	ENST00000326631 // sense // intron // 4 /// ENST00000585423 // sense // intron // 3 /// ENST00000586497 // sense // intron // 3 /// ENST00000586608 // sense // intron // 2 /// ENST00000587394 // sense // intron // 4 /// ENST00000587962 // sense // intron // 4 /// ENST00000588450 // sense // intron // 2 /// ENST00000588545 // sense // intron // 4 /// ENST00000589097 // sense // intron // 5 /// ENS…	hsa-mir-1227 // chr19:2234061-2234148 (-) /// hsa-mir-6789 // chr19:2235828-2235925 (-)	miRBase
MIMAT0005582_st	hsa-miR-1228-5p	-0.279639	0.406148	0.992346	7.20889	7.27086	6.7846	7.0177	6.34424	7.06348	MIMAT0005582	miRNA	Homo sapiens	chr12:57588287-57588307 (+)	21	GUGGGCGGGGGCAGGUGUGUG	ENST00000243077 // sense // intron // 49 /// OTTHUMT00000412772 // sense // intron // 49	---	miRBase
MIMAT0022942_st	hsa-miR-1229-5p	-0.86795	0.0761303	0.992346	4.27346	4.48605	4.20274	4.13598	2.5781	3.64431	MIMAT0022942	miRNA	Homo sapiens	chr5:179225323-179225346 (-)	24	GUGGGUAGGGUUUGGGGGAGAGCG	ENST00000292591 // sense // intron // 13 /// ENST00000337755 // sense // intron // 12 /// ENST00000518778 // sense // intron // 10 /// ENST00000518980 // sense // intron // 8 /// ENST00000519836 // sense // intron // 10 /// ENST00000520875 // sense // intron // 7 /// ENST00000520969 // sense // intron // 5 /// ENST00000522293 // sense // intron // 4 /// ENST00000522451 // sense // intron // 2 ///…	---	miRBase
MIMAT0005586_st	hsa-miR-1231	0.663486	0.26027	0.992346	0.631457	1.63087	0.393839	1.47839	0.646286	2.52194	MIMAT0005586	miRNA	Homo sapiens	chr1:201777743-201777762 (+)	20	GUGUCUGGGCGGACAGCUGC	ENST00000295624 // sense // intron // 18 /// ENST00000367295 // sense // intron // 16 /// ENST00000367296 // sense // intron // 19 /// ENST00000367297 // sense // intron // 18 /// ENST00000367300 // sense // intron // 17 /// ENST00000367302 // sense // intron // 19 /// ENST00000413035 // antisense // intron // 2 /// OTTHUMT00000087013 // sense // intron // 19 /// OTTHUMT00000087014 // sense // in…	---	miRBase
MIMAT0022943_st	hsa-miR-1233-5p	0.296046	0.447699	0.992346	4.30357	4.93003	5.48354	4.87409	5.36038	5.37081	MIMAT0022943	miRNA	Homo sapiens	chr15:34674327-34674348 (-)	22	AGUGGGAGGCCAGGGCACGGCA	ENST00000359187 // sense // intron // 13 /// ENST00000360553 // sense // intron // 21 /// ENST00000432566 // sense // intron // 12 /// ENST00000473125 // sense // intron // 20 /// ENST00000543376 // sense // intron // 20 /// OTTHUMT00000251698 // sense // intron // 20 /// OTTHUMT00000251830 // sense // intron // 13 /// ENST00000267731 // sense // intron // 22 /// ENST00000342314 // sense // intro…	---	miRBase
MIMAT0022945_st	hsa-miR-1236-5p	-0.0821202	0.904134	0.998769	1.90698	3.21401	0.785642	2.63745	1.08905	1.93378	MIMAT0022945	miRNA	Homo sapiens	chr6:31924695-31924716 (-)	22	UGAGUGACAGGGGAAAUGGGGA	ENST00000375425 // sense // intron // 3 /// ENST00000375429 // sense // intron // 3 /// ENST00000426722 // sense // intron // 3 /// ENST00000436289 // sense // intron // 2 /// ENST00000441998 // sense // intron // 3 /// ENST00000444811 // sense // intron // 3 /// ENST00000454913 // sense // intron // 2 /// ENST00000481121 // sense // intron // 3 /// ENST00000488426 // sense // intron // 2 /// ENS…	---	miRBase
MIMAT0022946_st	hsa-miR-1237-5p	-0.0396454	0.883962	0.998769	8.21167	8.5771	8.25576	8.16714	8.35335	8.40511	MIMAT0022946	miRNA	Homo sapiens	chr11:64136123-64136143 (+)	21	CGGGGGCGGGGCCGAAGCGCG	ENST00000294261 // sense // intron // 10 /// ENST00000334205 // sense // intron // 11 /// ENST00000528057 // sense // intron // 11 /// ENST00000528355 // sense // intron // 11 /// ENST00000530504 // sense // intron // 11 /// OTTHUMT00000106246 // sense // intron // 11 /// OTTHUMT00000385364 // sense // intron // 11 /// OTTHUMT00000385368 // sense // intron // 11 /// OTTHUMT00000385369 // sense //…	---	miRBase
MIMAT0022947_st	hsa-miR-1238-5p	0.423004	0.475663	0.992346	1.69326	1.93688	0.901913	2.52329	0.70313	2.57465	MIMAT0022947	miRNA	Homo sapiens	chr19:10662798-10662820 (+)	23	GUGAGUGGGAGCCCCAGUGUGUG	ENST00000309469 // sense // intron // 8 /// ENST00000540862 // sense // intron // 3 /// ENST00000585437 // sense // intron // 2 /// ENST00000585752 // sense // intron // 4 /// ENST00000586417 // sense // intron // 8 /// ENST00000588667 // sense // intron // 7 /// ENST00000588857 // sense // intron // 8 /// ENST00000588972 // sense // intron // 2 /// ENST00000589753 // sense // intron // 3 /// OTT…	---	miRBase
MIMAT0000422_st	hsa-miR-124-3p	0.593522	0.105304	0.992346	0.371867	0.103082	-0.149805	0.855084	1.027	0.223629	MIMAT0000422	miRNA	Homo sapiens	chr20:61809904-61809923 (+) /// chr8:9760911-9760930 (-) /// chr8:65291767-65291786 (+)	20	UAAGGCACGCGGUGAAUGCC	ENST00000517675 // sense // exon // 1 /// ENST00000521242 // sense // exon // 4 /// ENST00000521863 // sense // exon // 3 /// OTTHUMT00000375047 // sense // exon // 1 /// OTTHUMT00000376963 // sense // exon // 3 /// OTTHUMT00000376964 // sense // exon // 4 /// ENST00000519741 // sense // intron // 1 /// ENST00000521441 // sense // intron // 2 /// OTTHUMT00000378434 // sense // intron // 2 /// OTT…	---	miRBase
MIMAT0005898_st	hsa-miR-1246	0.137798	0.700765	0.992346	5.52671	4.83426	4.48809	5.02419	4.89555	5.34271	MIMAT0005898	miRNA	Homo sapiens	chr2:177465752-177465770 (-)	19	AAUGGAUUUUUGGAGCAGG	---	---	miRBase
MIMAT0005902_st	hsa-miR-1250-5p	0.107844	0.811526	0.992346	0.552273	1.2007	0.896411	1.37551	0.0828642	1.51454	MIMAT0005902	miRNA	Homo sapiens	chr17:79107065-79107085 (-)	21	ACGGUGCUGGAUGUGGCCUUU	ENST00000326724 // sense // intron // 2 /// ENST00000374792 // sense // intron // 2 /// OTTHUMT00000256055 // sense // intron // 2 /// OTTHUMT00000439038 // sense // intron // 2	hsa-mir-338 // chr17:79099683-79099749 (-) /// hsa-mir-657 // chr17:79099076-79099173 (-) /// hsa-mir-1250 // chr17:79106996-79107108 (-) /// hsa-mir-3065 // chr17:79099677-79099755 (+)	miRBase
MIMAT0005909_st	hsa-miR-1258	-0.300058	0.3533	0.992346	0.832902	1.02288	0.222558	0.342667	0.492836	0.342667	MIMAT0005909	miRNA	Homo sapiens	chr2:180725572-180725592 (-)	21	AGUUAGGAUUAGGUCGUGGAA	ENST00000410066 // sense // intron // 1 /// OTTHUMT00000335972 // sense // intron // 1	---	miRBase
MIMAT0000443_st	hsa-miR-125a-5p	-0.109414	0.761401	0.992346	0.253757	1.31496	1.16354	0.888142	0.676188	0.839694	MIMAT0000443	miRNA	Homo sapiens	chr19:52196521-52196544 (+)	24	UCCCUGAGACCCUUUAACCUGUGA	ENST00000602324 // antisense // exon // 1 /// OTTHUMT00000467329 // antisense // exon // 1	hsa-let-7e // chr19:52196039-52196117 (+) /// hsa-mir-125a // chr19:52196507-52196592 (+) /// hsa-mir-99b // chr19:52195865-52195934 (+)	miRBase
MIMAT0000423_st	hsa-miR-125b-5p	0.229403	0.579011	0.992346	0.461337	0.636912	1.60836	0.725598	1.14925	1.51997	MIMAT0000423	miRNA	Homo sapiens	chr11:121970517-121970538 (-) /// chr21:17962573-17962594 (+)	22	UCCCUGAGACCCUAACUUGUGA	ENST00000524376 // sense // intron // 1 /// ENST00000528986 // sense // intron // 1 /// ENST00000529823 // sense // intron // 1 /// ENST00000530955 // sense // intron // 1 /// ENST00000531071 // sense // intron // 2 /// ENST00000531381 // sense // intron // 1 /// ENST00000532315 // sense // intron // 1 /// ENST00000532319 // sense // intron // 1 /// ENST00000532890 // sense // intron // 2 /// ENS…	---	miRBase
MIMAT0000445_st	hsa-miR-126-3p	-0.795727	0.102474	0.992346	2.08135	2.24753	0.960006	1.40629	0.526733	0.968675	MIMAT0000445	miRNA	Homo sapiens	chr9:139565105-139565126 (+)	22	UCGUACCGUGAGUAAUAAUGCG	ENST00000308874 // sense // intron // 7 /// ENST00000371698 // sense // intron // 6 /// ENST00000371699 // sense // intron // 7 /// ENST00000406555 // sense // intron // 7 /// ENST00000492002 // sense // intron // 5 /// OTTHUMT00000055094 // sense // intron // 7 /// OTTHUMT00000055095 // sense // intron // 7 /// OTTHUMT00000055096 // sense // intron // 6 /// OTTHUMT00000055099 // sense // intron …	---	miRBase
MIMAT0015041_st	hsa-miR-1260b	0.193202	0.538321	0.992346	0.585316	0.591511	1.11536	1.05675	0.64169	1.17335	MIMAT0015041	miRNA	Homo sapiens	chr11:96074611-96074629 (+)	19	AUCCCACCACUGCCACCAU	ENST00000440572 // antisense // exon // 2 /// ENST00000524717 // antisense // exon // 1 /// OTTHUMT00000395540 // antisense // exon // 1 /// OTTHUMT00000395541 // antisense // exon // 2	---	miRBase
MIMAT0005913_st	hsa-miR-1261	0.464939	0.595307	0.992346	1.93241	2.71364	1.42142	3.96231	0.522829	2.97715	MIMAT0005913	miRNA	Homo sapiens	chr11:90602348-90602366 (-)	19	AUGGAUAAGGCUUUGGCUU	ENST00000562245 // antisense // intron // 6 /// OTTHUMT00000421430 // antisense // intron // 6	---	miRBase
MIMAT0005915_st	hsa-miR-1263	0.473956	0.359998	0.992346	0.860707	1.668	2.1129	1.58507	2.8986	1.5798	MIMAT0005915	miRNA	Homo sapiens	chr3:163889311-163889332 (-)	22	AUGGUACCCUGGCAUACUGAGU	---	---	miRBase
MIMAT0005922_st	hsa-miR-1268a	-0.34365	0.414229	0.992346	5.9214	5.69787	4.70489	5.50693	4.94968	4.8366	MIMAT0005922	miRNA	Homo sapiens	chr15:22513259-22513276 (-)	18	CGGGCGUGGUGGUGGGGG	---	---	miRBase
MIMAT0018925_st	hsa-miR-1268b	-0.414791	0.378824	0.992346	5.89217	5.75017	4.70439	5.58738	4.42411	5.09087	MIMAT0018925	miRNA	Homo sapiens	chr17:78072630-78072649 (+)	20	CGGGCGUGGUGGUGGGGGUG	ENST00000397545 // sense // intron // 19 /// ENST00000574799 // sense // intron // 15 /// OTTHUMT00000256005 // sense // intron // 19 /// OTTHUMT00000437430 // sense // intron // 15	---	miRBase
MIMAT0000446_st	hsa-miR-127-3p	1.5297	0.0537045	0.992346	3.08527	2.72663	1.74885	4.75857	2.56213	4.82915	MIMAT0000446	miRNA	Homo sapiens	chr14:101349372-101349393 (+)	22	UCGGAUCCGUCUGAGCUUGGCU	ENST00000534062 // antisense // exon // 1 /// OTTHUMT00000395127 // antisense // exon // 1	hsa-mir-127 // chr14:101349316-101349412 (+) /// hsa-mir-136 // chr14:101351039-101351120 (+) /// hsa-mir-337 // chr14:101340830-101340922 (+) /// hsa-mir-431 // chr14:101347344-101347457 (+) /// hsa-mir-433 // chr14:101348223-101348315 (+) /// hsa-mir-432 // chr14:101350820-101350913 (+) /// hsa-mir-665 // chr14:101341370-101341441 (+)	miRBase
MIMAT0005925_st	hsa-miR-1272	0.126615	0.762284	0.992346	0.749952	0.696009	1.56118	1.44813	0.455756	1.48311	MIMAT0005925	miRNA	Homo sapiens	chr15:65054670-65054695 (-)	26	GAUGAUGAUGGCAGCAAAUUCUGAAA	ENST00000300069 // sense // intron // 1 /// OTTHUMT00000418466 // sense // intron // 1	---	miRBase
MIMAT0015090_st	hsa-miR-1273d	-0.198877	0.703399	0.992346	1.61092	2.37083	2.53807	2.92533	1.11224	1.88561	MIMAT0015090	miRNA	Homo sapiens	chr1:10287785-10287809 (+)	25	GAACCCAUGAGGUUGAGGCUGCAGU	ENST00000263934 // sense // intron // 1 /// ENST00000377086 // sense // intron // 1 /// ENST00000377093 // sense // intron // 1 /// OTTHUMT00000005102 // sense // intron // 1 /// OTTHUMT00000005103 // sense // intron // 1 /// OTTHUMT00000005104 // sense // intron // 1	---	miRBase
MIMAT0020601_st	hsa-miR-1273f	-0.0150675	0.956846	0.998769	2.6024	2.93557	2.80542	2.97715	2.54333	2.77771	MIMAT0020601	miRNA	Homo sapiens	chr1:53394370-53394388 (+)	19	GGAGAUGGAGGUUGCAGUG	ENST00000371509 // sense // intron // 1 /// ENST00000371513 // sense // intron // 1 /// ENST00000371514 // sense // intron // 1 /// ENST00000407246 // sense // intron // 1 /// ENST00000478631 // sense // intron // 1 /// ENST00000528311 // sense // intron // 1 /// ENST00000528809 // sense // intron // 1 /// OTTHUMT00000024740 // sense // intron // 1 /// OTTHUMT00000024743 // sense // intron // 1 /…	hsa-mir-5095 // chr1:53400602-53400689 (+) /// hsa-mir-1273f // chr1:53394346-53394444 (+)	miRBase
MIMAT0022742_st	hsa-miR-1273g-3p	0.531394	0.201096	0.992346	5.72644	6.35434	6.76193	7.32325	6.56606	6.54757	MIMAT0022742	miRNA	Homo sapiens	chr1:53406042-53406062 (+)	21	ACCACUGCACUCCAGCCUGAG	ENST00000371509 // sense // intron // 1 /// ENST00000371513 // sense // intron // 1 /// ENST00000371514 // sense // intron // 1 /// ENST00000407246 // sense // intron // 1 /// ENST00000478631 // sense // intron // 1 /// ENST00000528311 // sense // intron // 1 /// ENST00000528809 // sense // intron // 1 /// OTTHUMT00000024740 // sense // intron // 1 /// OTTHUMT00000024743 // sense // intron // 1 /…	hsa-mir-5095 // chr1:53400602-53400689 (+) /// hsa-mir-1273g // chr1:53405986-53406085 (+)	miRBase
MIMAT0030415_st	hsa-miR-1273h-5p	-0.569161	0.25846	0.992346	2.62422	3.7218	1.99819	2.50139	1.85076	2.28458	MIMAT0030415	miRNA	Homo sapiens	chr16:24214469-24214489 (+)	21	CUGGGAGGUCAAGGCUGCAGU	ENST00000303531 // sense // intron // 16 /// ENST00000321728 // sense // intron // 16 /// OTTHUMT00000254504 // sense // intron // 16 /// OTTHUMT00000254505 // sense // intron // 16	---	miRBase
MIMAT0005929_st	hsa-miR-1275	-0.136627	0.656546	0.992346	4.6898	5.08965	5.02501	4.75934	4.488	5.14723	MIMAT0005929	miRNA	Homo sapiens	chr6:33967795-33967811 (-)	17	GUGGGGGAGAGGCUGUC	---	---	miRBase
MIMAT0005937_st	hsa-miR-1279	0.308766	0.286228	0.992346	-0.491604	-0.183525	0.0494091	0.103082	0.0944136	0.103082	MIMAT0005937	miRNA	Homo sapiens	chr12:69666968-69666984 (-)	17	UCAUAUUGCUUCUUUCU	ENST00000435070 // antisense // exon // 10 /// OTTHUMT00000403609 // antisense // exon // 10	---	miRBase
MIMAT0005939_st	hsa-miR-1281	0.2884	0.399134	0.992346	2.53703	2.14099	2.39849	3.16687	2.30672	2.46811	MIMAT0005939	miRNA	Homo sapiens	chr22:41488549-41488565 (+)	17	UCGCCUCCUCCUCUCCC	ENST00000263253 // sense // 3UTR // 1 /// OTTHUMT00000320600 // sense // 3UTR // 1	---	miRBase
MIMAT0005876_st	hsa-miR-1285-3p	-0.10917	0.729695	0.992346	0.642406	0.498583	0.960305	0.204128	0.919689	0.649966	MIMAT0005876	miRNA	Homo sapiens	chr2:70480065-70480086 (-) /// chr7:91833341-91833362 (-)	22	UCUGGGCAACAAAGUGAGACCU	ENST00000340022 // sense // intron // 17 /// ENST00000394503 // sense // intron // 15 /// ENST00000394505 // sense // intron // 17 /// ENST00000394507 // sense // intron // 18 /// ENST00000412043 // sense // intron // 17 /// ENST00000414227 // sense // intron // 1 /// ENST00000475770 // sense // intron // 10 /// ENST00000486261 // sense // intron // 11 /// OTTHUMT00000253910 // sense // intron //…	---	miRBase
MIMAT0004605_st	hsa-miR-129-2-3p	0.557919	0.0870643	0.992346	0.109353	0.0877725	0.0748299	0.554457	0.363451	1.0278	MIMAT0004605	miRNA	Homo sapiens	chr11:43603000-43603021 (+)	22	AAGCCCUUACCCCAAAAAGCAU	ENST00000526615 // sense // intron // 2 /// ENST00000532864 // sense // intron // 1 /// ENST00000533358 // sense // intron // 1 /// OTTHUMT00000389683 // sense // intron // 2 /// OTTHUMT00000389684 // sense // intron // 1 /// OTTHUMT00000389685 // sense // intron // 1	---	miRBase
MIMAT0000242_st	hsa-miR-129-5p	0.920087	0.055701	0.992346	1.23856	1.6428	0.473998	1.76659	2.59577	1.75325	MIMAT0000242	miRNA	Homo sapiens	chr11:43602958-43602978 (+) /// chr7:127847929-127847949 (+)	21	CUUUUUGCGGUCUGGGCUUGC	ENST00000384972 // sense // exon // 1 /// ENST00000526615 // sense // intron // 2 /// ENST00000532864 // sense // intron // 1 /// ENST00000533358 // sense // intron // 1 /// OTTHUMT00000389683 // sense // intron // 2 /// OTTHUMT00000389684 // sense // intron // 1 /// OTTHUMT00000389685 // sense // intron // 1	---	miRBase
MIMAT0005880_st	hsa-miR-1290	0.496132	0.369161	0.992346	1.33187	0.219061	-0.0260507	1.29659	0.0988073	1.61788	MIMAT0005880	miRNA	Homo sapiens	chr1:19223572-19223590 (-)	19	UGGAUUUUUGGAUCAGGGA	ENST00000290597 // sense // intron // 1 /// ENST00000375341 // sense // intron // 1 /// ENST00000432718 // sense // intron // 1 /// ENST00000494072 // sense // intron // 8 /// ENST00000538839 // sense // intron // 1 /// OTTHUMT00000006954 // sense // intron // 1 /// OTTHUMT00000006955 // sense // intron // 1 /// OTTHUMT00000006956 // sense // intron // 1 /// OTTHUMT00000393307 // sense // intron …	---	miRBase
MIMAT0005884_st	hsa-miR-1294	0.0942159	0.764269	0.992346	-0.0970597	0.741683	0.454967	0.463635	0.454967	0.463635	MIMAT0005884	miRNA	Homo sapiens	chr5:153726713-153726734 (+)	22	UGUGAGGUUGGCAUUGUUGUCU	ENST00000297107 // sense // intron // 4 /// ENST00000377661 // sense // intron // 4 /// ENST00000425427 // sense // intron // 4 /// ENST00000519571 // sense // intron // 4 /// ENST00000519727 // antisense // intron // 2 /// ENST00000520647 // sense // intron // 4 /// ENST00000521781 // sense // intron // 5 /// OTTHUMT00000252453 // sense // intron // 4 /// OTTHUMT00000374249 // sense // intron //…	---	miRBase
MIMAT0026641_st	hsa-miR-1298-3p	0.0694983	0.790038	0.992346	1.80414	2.04811	1.9439	1.9439	2.11684	1.9439	MIMAT0026641	miRNA	Homo sapiens	chrX:113949721-113949741 (+)	21	CAUCUGGGCAACUGACUGAAC	ENST00000276198 // sense // intron // 2 /// ENST00000371950 // sense // intron // 2 /// ENST00000371951 // sense // intron // 2 /// OTTHUMT00000057961 // sense // intron // 2 /// OTTHUMT00000057962 // sense // intron // 2 /// OTTHUMT00000057963 // sense // intron // 2	---	miRBase
MIMAT0005887_st	hsa-miR-1299	0.183425	0.743816	0.992346	1.03595	2.11348	0.493971	1.84726	0.493971	1.85246	MIMAT0005887	miRNA	Homo sapiens	chr9:69002239-69002260 (-)	22	UUCUGGAAUUCUGUGUGAGGGA	---	---	miRBase
MIMAT0005891_st	hsa-miR-1303	0.116046	0.712732	0.992346	0.43524	0.717041	0.347819	0.987916	0.636097	0.224226	MIMAT0005891	miRNA	Homo sapiens	chr5:154065387-154065408 (+)	22	UUUAGAGACGGGGUCUUGCUCU	---	---	miRBase
MIMAT0005950_st	hsa-miR-1306-3p	-0.517341	0.500919	0.992346	4.55512	4.12224	2.42768	4.24622	1.929	3.37779	MIMAT0005950	miRNA	Homo sapiens	chr22:20073635-20073652 (+)	18	ACGUUGGCUCUGGUGGUG	ENST00000351989 // sense // 3UTR // 2 /// ENST00000383024 // sense // 3UTR // 2 /// ENST00000407755 // sense // 3UTR // 1 /// ENST00000457069 // sense // 3UTR // 2 /// ENST00000495826 // sense // exon // 1 /// OTTHUMT00000318654 // sense // 3UTR // 2 /// OTTHUMT00000318655 // sense // exon // 1 /// OTTHUMT00000318656 // sense // 3UTR // 1 /// OTTHUMT00000319850 // sense // 3UTR // 2	hsa-mir-1306 // chr22:20073581-20073665 (+) /// hsa-mir-3618 // chr22:20073269-20073356 (+)	miRBase
MIMAT0005951_st	hsa-miR-1307-3p	1.07458	0.0250312	0.992346	2.39623	2.22799	2.47975	2.69035	4.03666	3.6007	MIMAT0005951	miRNA	Homo sapiens	chr10:105154058-105154079 (-)	22	ACUCGGCGUGGCGUCGGUCGUG	ENST00000309579 // sense // intron // 1 /// ENST00000337003 // sense // 5UTR // 2 /// ENST00000369811 // sense // intron // 1 /// ENST00000369815 // sense // intron // 2 /// ENST00000369825 // sense // 5UTR // 2 /// OTTHUMT00000050139 // sense // intron // 2 /// OTTHUMT00000050140 // sense // intron // 1 /// OTTHUMT00000050141 // sense // 5UTR // 2 /// OTTHUMT00000050142 // sense // 5UTR // 2 ///…	---	miRBase
MIMAT0000425_st	hsa-miR-130a-3p	0.272344	0.581948	0.992346	-0.110308	0.768785	1.11542	0.840167	0.158477	1.59229	MIMAT0000425	miRNA	Homo sapiens	chr11:57408725-57408746 (+)	22	CAGUGCAAUGUUAAAAGGGCAU	ENST00000528466 // sense // intron // 1 /// ENST00000530595 // sense // intron // 1 /// OTTHUMT00000393362 // sense // intron // 1 /// OTTHUMT00000393363 // sense // intron // 1	---	miRBase
MIMAT0000691_st	hsa-miR-130b-3p	-0.0362786	0.924405	0.998769	0.50337	1.668	1.32881	1.0879	1.41661	0.886833	MIMAT0000691	miRNA	Homo sapiens	chr22:22007643-22007664 (+)	22	CAGUGCAAUGAUGAAAGGGCAU	ENST00000498589 // sense // exon // 2 /// OTTHUMT00000102312 // sense // exon // 2	hsa-mir-130b // chr22:22007593-22007674 (+) /// hsa-mir-301b // chr22:22007270-22007347 (+)	miRBase
MIMAT0005953_st	hsa-miR-1322	-0.111776	0.75792	0.992346	0.797815	1.55072	0.689943	1.31593	0.65769	0.729534	MIMAT0005953	miRNA	Homo sapiens	chr8:10682885-10682903 (-)	19	GAUGAUGCUGCUGAUGCUG	ENST00000314787 // sense // intron // 5 /// ENST00000426190 // sense // intron // 5 /// ENST00000517607 // sense // intron // 3 /// ENST00000519088 // sense // intron // 5 /// ENST00000523559 // sense // intron // 5 /// ENST00000524061 // sense // intron // 1 /// ENST00000524114 // sense // intron // 5 /// ENST00000553390 // sense // intron // 5 /// ENST00000554914 // sense // intron // 5 /// OTT…	---	miRBase
MIMAT0005795_st	hsa-miR-1323	-0.218422	0.536854	0.992346	1.2123	2.1351	1.74885	1.15836	1.74885	1.53378	MIMAT0005795	miRNA	Homo sapiens	chr19:54175232-54175253 (+)	22	UCAAAACUGAGGGGCAUUUUCU	---	hsa-mir-512-1 // chr19:54169933-54170016 (+) /// hsa-mir-512-2 // chr19:54172411-54172508 (+) /// hsa-mir-498 // chr19:54177451-54177574 (+) /// hsa-mir-520e // chr19:54178965-54179051 (+) /// hsa-mir-515-1 // chr19:54182257-54182339 (+) /// hsa-mir-519e // chr19:54183194-54183277 (+) /// hsa-mir-1323 // chr19:54175222-54175294 (+)	miRBase
MIMAT0027038_st	hsa-miR-1343-5p	0.184829	0.600192	0.992346	5.0408	5.47651	5.17819	4.89558	5.9052	5.44921	MIMAT0027038	miRNA	Homo sapiens	chr11:34963398-34963419 (+)	22	UGGGGAGCGGCCCCCGGGUGGG	ENST00000227868 // sense // intron // 2 /// ENST00000430469 // sense // intron // 2 /// ENST00000448838 // sense // intron // 2 /// ENST00000533262 // sense // intron // 1 /// ENST00000533550 // sense // intron // 2 /// OTTHUMT00000390015 // sense // intron // 2 /// OTTHUMT00000390016 // sense // intron // 2 /// OTTHUMT00000390017 // sense // intron // 2 /// OTTHUMT00000390018 // sense // intron …	---	miRBase
MIMAT0004595_st	hsa-miR-135a-3p	0.376852	0.469403	0.992346	2.65758	2.06725	2.90746	3.4992	1.86379	3.39985	MIMAT0004595	miRNA	Homo sapiens	chr3:52328248-52328269 (-)	22	UAUAGGGAUUGGAGCCGUGGCG	ENST00000354773 // antisense // exon // 4 /// ENST00000467187 // sense // intron // 1 /// ENST00000493616 // sense // intron // 1 /// OTTHUMT00000350824 // sense // intron // 1 /// OTTHUMT00000350826 // sense // intron // 1	---	miRBase
MIMAT0004607_st	hsa-miR-138-1-3p	-0.496162	0.172877	0.992346	1.71577	1.88342	1.82822	1.42166	0.75191	1.76537	MIMAT0004607	miRNA	Homo sapiens	chr3:44155766-44155787 (+)	22	GCUACUUCACAACACCAGGGCC	---	---	miRBase
MIMAT0026638_st	hsa-miR-1468-3p	0.470672	0.167358	0.992346	0.053537	0.463635	0.463635	0.738245	0.454967	1.19961	MIMAT0026638	miRNA	Homo sapiens	chrX:63005892-63005913 (-)	22	AGCAAAAUAAGCAAAUGGAAAA	---	---	miRBase
MIMAT0007347_st	hsa-miR-1469	0.0640245	0.800791	0.992346	7.81288	7.7432	7.86466	7.83148	7.92155	7.85978	MIMAT0007347	miRNA	Homo sapiens	chr15:96876490-96876511 (+)	22	CUCGGCGCGGGGCGCGGGCUCC	ENST00000394166 // sense // intron // 1 /// ENST00000394171 // sense // intron // 1 /// ENST00000421109 // sense // intron // 1 /// ENST00000453270 // sense // 3UTR // 1 /// ENST00000559679 // sense // intron // 1 /// OTTHUMT00000313534 // sense // intron // 1 /// OTTHUMT00000415367 // sense // intron // 1 /// OTTHUMT00000415368 // sense // 3UTR // 1 /// OTTHUMT00000415373 // sense // intron // 1	---	miRBase
MIMAT0007349_st	hsa-miR-1471	-0.0235407	0.958211	0.998769	0.765289	1.45313	2.13511	1.99982	1.07795	1.20514	MIMAT0007349	miRNA	Homo sapiens	chr2:232756987-232757008 (-)	22	GCCCGCGUGUGGAGCCAGGUGU	---	---	miRBase
MIMAT0004609_st	hsa-miR-149-3p	0.182494	0.542774	0.992346	6.25619	6.78429	6.11353	6.57448	6.6121	6.51491	MIMAT0004609	miRNA	Homo sapiens	chr2:241395473-241395493 (+)	21	AGGGAGGGACGGGGGCUGUGC	ENST00000264039 // sense // intron // 1 /// ENST00000404327 // antisense // intron // 1 /// ENST00000404891 // antisense // intron // 1 /// ENST00000420138 // sense // intron // 1 /// ENST00000426280 // sense // intron // 1 /// ENST00000469694 // sense // intron // 1 /// OTTHUMT00000257179 // sense // intron // 1 /// OTTHUMT00000325970 // sense // intron // 1 /// OTTHUMT00000325972 // sense // in…	---	miRBase
MIMAT0004610_st	hsa-miR-150-3p	0.299531	0.543791	0.992346	3.00848	2.58376	1.84594	3.63602	2.28485	2.41591	MIMAT0004610	miRNA	Homo sapiens	chr19:50004054-50004075 (-)	22	CUGGUACAGGCCUGGGGGACAG	ENST00000602157 // antisense // 3UTR // 1	---	miRBase
MIMAT0004697_st	hsa-miR-151a-5p	-0.0615614	0.878781	0.998769	0.289107	1.45138	0.682559	0.569502	0.455981	1.21288	MIMAT0004697	miRNA	Homo sapiens	chr8:141742722-141742742 (-)	21	UCGAGGAGCUCACAGUCUAGU	ENST00000340930 // sense // intron // 22 /// ENST00000395218 // sense // intron // 22 /// ENST00000517887 // sense // intron // 21 /// ENST00000518509 // sense // intron // 4 /// ENST00000519419 // sense // intron // 22 /// ENST00000519465 // sense // intron // 8 /// ENST00000519654 // sense // intron // 20 /// ENST00000519993 // sense // intron // 22 /// ENST00000521029 // sense // intron // 3 /…	---	miRBase
MIMAT0007400_st	hsa-miR-1538	-0.0394463	0.954828	0.998769	3.35829	3.60867	1.05406	2.6704	2.16909	3.06318	MIMAT0007400	miRNA	Homo sapiens	chr16:69599711-69599733 (-)	23	CGGCCCGGGCUGCUGCUGUUCCU	ENST00000349945 // antisense // 3UTR // 1 /// ENST00000426654 // antisense // 3UTR // 1 /// ENST00000432919 // antisense // 3UTR // 1 /// OTTHUMT00000433971 // antisense // 3UTR // 1	---	miRBase
MIMAT0004658_st	hsa-miR-155-3p	0.451513	0.283558	0.992346	0.490607	0.504739	0.504739	0.504739	0.567837	1.78205	MIMAT0004658	miRNA	Homo sapiens	chr21:26946334-26946355 (+)	22	CUCCUACAUAUUAGCAUUAACA	ENST00000456917 // sense // exon // 4 /// OTTHUMT00000171187 // sense // exon // 4	---	miRBase
MIMAT0019077_st	hsa-miR-1587	0.485762	0.244608	0.992346	4.76562	5.37294	4.12544	5.21762	4.93208	5.57159	MIMAT0019077	miRNA	Homo sapiens	chrX:39696816-39696835 (+)	20	UUGGGCUGGGCUGGGUUGGG	ENST00000562814 // antisense // exon // 2 /// OTTHUMT00000430435 // antisense // exon // 2	---	miRBase
MIMAT0004488_st	hsa-miR-15a-3p	0.0909095	0.794423	0.992346	0.797405	0.196889	0.815701	0.382908	0.526733	1.17308	MIMAT0004488	miRNA	Homo sapiens	chr13:50623266-50623287 (-)	22	CAGGCCAUAUUGUGCUGCCUCA	ENST00000235290 // sense // intron // 4 /// ENST00000421758 // sense // exon // 3 /// ENST00000425586 // sense // intron // 4 /// ENST00000433070 // sense // intron // 3 /// ENST00000443587 // sense // intron // 5 /// ENST00000449579 // sense // exon // 4 /// ENST00000458725 // sense // intron // 4 /// OTTHUMT00000044954 // sense // intron // 3 /// OTTHUMT00000044955 // sense // exon // 3 /// OTT…	hsa-mir-15a // chr13:50623255-50623337 (-) /// hsa-mir-16-1 // chr13:50623109-50623197 (-)	miRBase
MIMAT0004489_st	hsa-miR-16-1-3p	0.148571	0.681097	0.992346	1.69756	2.24753	1.4293	2.0733	1.47948	2.26732	MIMAT0004489	miRNA	Homo sapiens	chr13:50623121-50623142 (-)	22	CCAGUAUUAACUGUGCUGCUGA	ENST00000235290 // sense // intron // 4 /// ENST00000425586 // sense // intron // 4 /// ENST00000433070 // sense // intron // 3 /// ENST00000443587 // sense // intron // 5 /// ENST00000458725 // sense // intron // 4 /// OTTHUMT00000044954 // sense // intron // 3 /// OTTHUMT00000044957 // sense // intron // 4 /// OTTHUMT00000044958 // sense // intron // 5 /// OTTHUMT00000044961 // sense // intron …	hsa-mir-15a // chr13:50623255-50623337 (-) /// hsa-mir-16-1 // chr13:50623109-50623197 (-)	miRBase
MIMAT0004518_st	hsa-miR-16-2-3p	0.346226	0.55785	0.992346	2.50777	3.11935	4.61958	3.67128	4.30704	3.30707	MIMAT0004518	miRNA	Homo sapiens	chr3:160122585-160122606 (+)	22	CCAAUAUUACUGUGCUGCUUUA	ENST00000344722 // sense // intron // 4 /// ENST00000357388 // sense // intron // 5 /// ENST00000360111 // sense // intron // 5 /// ENST00000462787 // sense // intron // 4 /// ENST00000467468 // sense // intron // 4 /// ENST00000468653 // sense // intron // 5 /// ENST00000469762 // sense // intron // 5 /// ENST00000469858 // sense // intron // 3 /// ENST00000470240 // sense // intron // 2 /// ENS…	hsa-mir-16-2 // chr3:160122533-160122613 (+) /// hsa-mir-15b // chr3:160122376-160122473 (+)	miRBase
MIMAT0000069_st	hsa-miR-16-5p	0.221623	0.477955	0.992346	-0.0215894	0.52632	0.584643	0.332507	0.672442	0.749295	MIMAT0000069	miRNA	Homo sapiens	chr13:50623163-50623184 (-) /// chr3:160122542-160122563 (+)	22	UAGCAGCACGUAAAUAUUGGCG	ENST00000235290 // sense // intron // 4 /// ENST00000425586 // sense // intron // 4 /// ENST00000433070 // sense // intron // 3 /// ENST00000443587 // sense // intron // 5 /// ENST00000458725 // sense // intron // 4 /// OTTHUMT00000044954 // sense // intron // 3 /// OTTHUMT00000044957 // sense // intron // 4 /// OTTHUMT00000044958 // sense // intron // 5 /// OTTHUMT00000044961 // sense // intron …	hsa-mir-15a // chr13:50623255-50623337 (-) /// hsa-mir-16-1 // chr13:50623109-50623197 (-) /// hsa-mir-16-2 // chr3:160122533-160122613 (+) /// hsa-mir-15b // chr3:160122376-160122473 (+)	miRBase
MIMAT0000070_st	hsa-miR-17-5p	0.389364	0.443161	0.992346	1.11793	2.26834	2.87356	2.03703	2.57979	2.81111	MIMAT0000070	miRNA	Homo sapiens	chr13:92002872-92002894 (+)	23	CAAAGUGCUUACAGUGCAGGUAG	ENST00000400282 // sense // intron // 3 /// ENST00000581816 // sense // exon // 3 /// ENST00000582141 // sense // exon // 2 /// OTTHUMT00000045448 // sense // intron // 3 /// OTTHUMT00000442497 // sense // exon // 2 /// OTTHUMT00000442498 // sense // exon // 3	hsa-mir-17 // chr13:92002859-92002942 (+) /// hsa-mir-18a // chr13:92003005-92003075 (+) /// hsa-mir-19a // chr13:92003145-92003226 (+) /// hsa-mir-19b-1 // chr13:92003446-92003532 (+) /// hsa-mir-20a // chr13:92003319-92003389 (+) /// hsa-mir-92a-1 // chr13:92003568-92003645 (+)	miRBase
MIMAT0000256_st	hsa-miR-181a-5p	0.135855	0.687804	0.992346	0.89351	0.747389	0.617905	1.44996	0.546962	0.669441	MIMAT0000256	miRNA	Homo sapiens	chr1:198828237-198828259 (-) /// chr9:127454759-127454781 (+)	23	AACAUUCAACGCUGUCGGUGAGU	ENST00000344523 // antisense // intron // 2 /// ENST00000373584 // antisense // intron // 2 /// ENST00000416460 // antisense // intron // 2 /// ENST00000429139 // sense // intron // 1 /// ENST00000487099 // antisense // intron // 2 /// OTTHUMT00000054033 // sense // intron // 1 /// OTTHUMT00000054043 // antisense // intron // 2 /// OTTHUMT00000356283 // antisense // intron // 2 /// OTTHUMT0000035…	hsa-mir-181a-2 // chr9:127454721-127454830 (+) /// hsa-mir-181b-2 // chr9:127455989-127456077 (+) /// hsa-mir-181b-1 // chr1:198828002-198828111 (-) /// hsa-mir-181a-1 // chr1:198828173-198828282 (-)	miRBase
MIMAT0000257_st	hsa-miR-181b-5p	0.564698	0.2628	0.992346	1.42191	1.0508	0.711612	2.2516	0.637853	1.98896	MIMAT0000257	miRNA	Homo sapiens	chr1:198828054-198828076 (-) /// chr9:127456004-127456026 (+)	23	AACAUUCAUUGCUGUCGGUGGGU	ENST00000432296 // sense // intron // 2 /// OTTHUMT00000087434 // sense // intron // 2 /// ENST00000344523 // antisense // intron // 2 /// ENST00000373584 // antisense // intron // 2 /// ENST00000416460 // antisense // intron // 2 /// ENST00000429139 // sense // intron // 1 /// ENST00000487099 // antisense // intron // 2 /// OTTHUMT00000054033 // sense // intron // 1 /// OTTHUMT00000054043 // ant…	hsa-mir-181b-1 // chr1:198828002-198828111 (-) /// hsa-mir-181a-1 // chr1:198828173-198828282 (-) /// hsa-mir-181a-2 // chr9:127454721-127454830 (+) /// hsa-mir-181b-2 // chr9:127455989-127456077 (+)	miRBase
MIMAT0026608_st	hsa-miR-181d-3p	0.220001	0.561418	0.992346	0.103082	0.792496	1.32881	0.792496	1.06128	1.03062	MIMAT0026608	miRNA	Homo sapiens	chr19:13985767-13985787 (+)	21	CCACCGGGGGAUGAAUGUCAC	ENST00000591161 // sense // intron // 1 /// ENST00000591727 // sense // intron // 1 /// OTTHUMT00000457943 // sense // intron // 1 /// OTTHUMT00000457944 // sense // intron // 1	hsa-mir-181c // chr19:13985513-13985622 (+) /// hsa-mir-181d // chr19:13985689-13985825 (+)	miRBase
MIMAT0002821_st	hsa-miR-181d-5p	-0.206522	0.620442	0.992346	0.475008	1.36108	0.344283	1.00505	0.00152427	0.554222	MIMAT0002821	miRNA	Homo sapiens	chr19:13985724-13985746 (+)	23	AACAUUCAUUGUUGUCGGUGGGU	ENST00000591161 // sense // intron // 1 /// ENST00000591727 // sense // intron // 1 /// OTTHUMT00000457943 // sense // intron // 1 /// OTTHUMT00000457944 // sense // intron // 1	hsa-mir-181c // chr19:13985513-13985622 (+) /// hsa-mir-181d // chr19:13985689-13985825 (+)	miRBase
MIMAT0004560_st	hsa-miR-183-3p	0.155844	0.579638	0.992346	-0.0265893	0.366876	0.125257	0.100327	0.369112	0.463635	MIMAT0004560	miRNA	Homo sapiens	chr7:129414768-129414789 (-)	22	GUGAAUUACCGAAGGGCCAUAA	---	hsa-mir-96 // chr7:129414532-129414609 (-) /// hsa-mir-182 // chr7:129410223-129410332 (-) /// hsa-mir-183 // chr7:129414745-129414854 (-)	miRBase
MIMAT0004611_st	hsa-miR-185-3p	0.00248793	0.995145	0.998769	5.06656	6.08804	5.97876	5.20786	5.78511	6.14785	MIMAT0004611	miRNA	Homo sapiens	chr22:20020711-20020732 (+)	22	AGGGGCUGGCUUUCCUCUGGUC	ENST00000327374 // sense // intron // 1 /// ENST00000398042 // sense // intron // 1 /// ENST00000399807 // sense // intron // 1 /// ENST00000401833 // sense // intron // 1 /// ENST00000401886 // sense // intron // 1 /// ENST00000411907 // sense // intron // 1 /// ENST00000430807 // sense // intron // 1 /// ENST00000432198 // sense // intron // 2 /// ENST00000432883 // sense // intron // 1 /// ENS…	---	miRBase
MIMAT0000455_st	hsa-miR-185-5p	-0.847482	0.0392881	0.992346	1.76676	0.739412	1.21579	0.283134	0.640631	0.255752	MIMAT0000455	miRNA	Homo sapiens	chr22:20020676-20020697 (+)	22	UGGAGAGAAAGGCAGUUCCUGA	ENST00000327374 // sense // intron // 1 /// ENST00000398042 // sense // intron // 1 /// ENST00000399807 // sense // intron // 1 /// ENST00000401833 // sense // intron // 1 /// ENST00000401886 // sense // intron // 1 /// ENST00000411907 // sense // intron // 1 /// ENST00000430807 // sense // intron // 1 /// ENST00000432198 // sense // intron // 2 /// ENST00000432883 // sense // intron // 1 /// ENS…	---	miRBase
MIMAT0000457_st	hsa-miR-188-5p	0.12849	0.847494	0.992346	1.91202	1.91149	0.616395	2.97245	1.08163	0.771294	MIMAT0000457	miRNA	Homo sapiens	chrX:49768123-49768143 (+)	21	CAUCCCUUGCAUGGUGGAGGG	ENST00000376088 // sense // intron // 3 /// ENST00000376091 // sense // intron // 3 /// ENST00000482218 // sense // intron // 3 /// OTTHUMT00000056542 // sense // intron // 3 /// OTTHUMT00000056543 // sense // intron // 3 /// OTTHUMT00000109349 // sense // intron // 3	hsa-mir-188 // chrX:49768109-49768194 (+) /// hsa-mir-362 // chrX:49773572-49773636 (+) /// hsa-mir-500a // chrX:49773039-49773122 (+) /// hsa-mir-501 // chrX:49774330-49774413 (+) /// hsa-mir-532 // chrX:49767754-49767844 (+) /// hsa-mir-660 // chrX:49777849-49777945 (+) /// hsa-mir-500b // chrX:49775280-49775358 (+)	miRBase
MIMAT0007881_st	hsa-miR-1908-5p	0.239105	0.520611	0.992346	5.60712	6.18692	6.41442	5.81052	6.66209	6.45318	MIMAT0007881	miRNA	Homo sapiens	chr11:61582681-61582701 (-)	21	CGGCGGGGACGGCGAUUGGUC	ENST00000350997 // sense // intron // 1 /// ENST00000421879 // sense // intron // 1 /// ENST00000424501 // sense // intron // 1 /// ENST00000433932 // sense // intron // 1 /// ENST00000448607 // sense // intron // 2 /// ENST00000466716 // sense // intron // 1 /// ENST00000473263 // sense // intron // 1 /// ENST00000491310 // sense // intron // 1 /// ENST00000540767 // sense // intron // 1 /// ENS…	---	miRBase
MIMAT0007883_st	hsa-miR-1909-3p	-0.282266	0.475445	0.992346	3.85025	4.62097	5.16081	4.15844	4.19976	4.42703	MIMAT0007883	miRNA	Homo sapiens	chr19:1816168-1816189 (-)	22	CGCAGGGGCCGGGUGCUCACCG	ENST00000170168 // sense // intron // 15 /// ENST00000586291 // sense // exon // 2 /// ENST00000587404 // sense // intron // 1 /// OTTHUMT00000449200 // sense // intron // 15 /// OTTHUMT00000449201 // sense // intron // 1 /// OTTHUMT00000449202 // sense // exon // 2	---	miRBase
MIMAT0007882_st	hsa-miR-1909-5p	-0.0873088	0.881783	0.998769	1.25545	1.57792	2.91726	2.24753	0.880273	2.36092	MIMAT0007882	miRNA	Homo sapiens	chr19:1816202-1816222 (-)	21	UGAGUGCCGGUGCCUGCCCUG	ENST00000170168 // sense // intron // 15 /// ENST00000586291 // sense // exon // 2 /// ENST00000587404 // sense // intron // 1 /// OTTHUMT00000449200 // sense // intron // 15 /// OTTHUMT00000449201 // sense // intron // 1 /// OTTHUMT00000449202 // sense // exon // 2	---	miRBase
MIMAT0026482_st	hsa-miR-190a-3p	0.629236	0.194758	0.992346	-0.157931	1.12843	0.243716	0.932064	0.526733	1.64312	MIMAT0026482	miRNA	Homo sapiens	chr15:63116207-63116227 (+)	21	CUAUAUAUCAAACAUAUUCCU	ENST00000306829 // sense // intron // 51 /// ENST00000489129 // sense // intron // 22 /// ENST00000494733 // sense // intron // 27 /// ENST00000561311 // sense // intron // 53 /// OTTHUMT00000257878 // sense // intron // 53 /// OTTHUMT00000257879 // sense // intron // 22 /// OTTHUMT00000257881 // sense // intron // 27	---	miRBase
MIMAT0000440_st	hsa-miR-191-5p	0.625487	0.345397	0.992346	1.46826	2.17257	1.54653	1.41409	1.82752	3.82221	MIMAT0000440	miRNA	Homo sapiens	chr3:49058105-49058127 (-)	23	CAACGGAAUCCCAAAAGCAGCUG	ENST00000313778 // sense // intron // 1 /// ENST00000326912 // antisense // intron // 1 /// ENST00000440857 // sense // intron // 1 /// ENST00000492585 // sense // intron // 1 /// ENST00000496568 // sense // intron // 1 /// OTTHUMT00000345586 // sense // intron // 1 /// OTTHUMT00000345587 // sense // intron // 1 /// OTTHUMT00000345595 // sense // intron // 1 /// OTTHUMT00000345596 // sense // int…	hsa-mir-191 // chr3:49058051-49058142 (-) /// hsa-mir-425 // chr3:49057581-49057667 (-)	miRBase
MIMAT0007884_st	hsa-miR-1910-5p	-0.331571	0.42777	0.992346	3.84542	4.60338	5.25536	4.25403	4.02573	4.42969	MIMAT0007884	miRNA	Homo sapiens	chr16:85775275-85775295 (-)	21	CCAGUCCUGUGCCUGCCGCCU	ENST00000284245 // sense // intron // 1 /// ENST00000602675 // sense // intron // 1 /// ENST00000602719 // sense // intron // 1 /// ENST00000602758 // sense // intron // 1 /// ENST00000602766 // sense // intron // 1 /// ENST00000602914 // sense // intron // 1 /// OTTHUMT00000467249 // sense // intron // 1 /// OTTHUMT00000467250 // sense // intron // 1 /// OTTHUMT00000467252 // sense // intron // …	---	miRBase
MIMAT0007892_st	hsa-miR-1915-3p	0.180616	0.537649	0.992346	6.43643	6.65936	6.873	6.55852	7.00476	6.94736	MIMAT0007892	miRNA	Homo sapiens	chr10:21785505-21785524 (-)	20	CCCCAGGGCGACGCGGCGGG	ENST00000377113 // sense // intron // 1 /// OTTHUMT00000047130 // sense // intron // 1	---	miRBase
MIMAT0004614_st	hsa-miR-193a-5p	0.197873	0.572449	0.992346	0.680556	1.34069	1.58246	1.72009	1.26372	1.21351	MIMAT0004614	miRNA	Homo sapiens	chr17:29887035-29887056 (+)	22	UGGGUCUUUGCGGGCGAGAUGA	---	---	miRBase
MIMAT0004767_st	hsa-miR-193b-5p	0.300072	0.426482	0.992346	0.383386	1.13302	0.332181	0.69474	0.652171	1.40189	MIMAT0004767	miRNA	Homo sapiens	chr16:14397837-14397858 (+)	22	CGGGGUUUUGAGGGCGAGAUGA	ENST00000570945 // sense // intron // 1 /// ENST00000571639 // sense // intron // 1 /// OTTHUMT00000436878 // sense // intron // 1 /// OTTHUMT00000436879 // sense // intron // 1	hsa-mir-365a // chr16:14403142-14403228 (+) /// hsa-mir-193b // chr16:14397824-14397906 (+)	miRBase
MIMAT0004671_st	hsa-miR-194-3p	0.31819	0.424385	0.992346	1.4194	2.24834	1.07598	2.25495	1.74188	1.70146	MIMAT0004671	miRNA	Homo sapiens	chr11:64658840-64658861 (-)	22	CCAGUGGGGCUGCUGUUAUCUG	ENST00000413053 // sense // exon // 2 /// OTTHUMT00000143253 // sense // exon // 2	hsa-mir-192 // chr11:64658609-64658718 (-) /// hsa-mir-194-2 // chr11:64658827-64658911 (-) /// hsa-mir-6750 // chr11:64665835-64665909 (-)	miRBase
MIMAT0004615_st	hsa-miR-195-3p	-0.00526983	0.991145	0.998769	4.82325	5.33391	3.83328	5.17661	4.15914	4.63887	MIMAT0004615	miRNA	Homo sapiens	chr17:6920947-6920968 (-)	22	CCAAUAUUGGCUGUGCUGCUCC	ENST00000443997 // sense // intron // 1 /// ENST00000572453 // sense // exon // 1 /// ENST00000572547 // sense // intron // 1 /// OTTHUMT00000450298 // sense // intron // 1 /// OTTHUMT00000450299 // sense // intron // 1 /// OTTHUMT00000450300 // sense // exon // 1	hsa-mir-195 // chr17:6920934-6921020 (-) /// hsa-mir-497 // chr17:6921230-6921341 (-)	miRBase
MIMAT0022691_st	hsa-miR-197-5p	0.100132	0.730163	0.992346	3.63483	3.41523	3.22176	3.40059	3.35667	3.81496	MIMAT0022691	miRNA	Homo sapiens	chr1:110141523-110141545 (+)	23	CGGGUAGAGAGGGCAGUGGGAGG	---	---	miRBase
MIMAT0009447_st	hsa-miR-1972	-0.187066	0.542571	0.992346	4.591	5.15437	4.84661	4.54094	4.50762	4.98223	MIMAT0009447	miRNA	Homo sapiens	chr16:15104186-15104207 (-) /// chr16:70064296-70064317 (+)	22	UCAGGCCAGGCACAGUGGCUCA	ENST00000325823 // antisense // intron // 8 /// ENST00000396410 // antisense // intron // 8 /// ENST00000447912 // antisense // intron // 7 /// ENST00000450288 // antisense // intron // 7 /// ENST00000455313 // antisense // intron // 7 /// ENST00000535621 // antisense // intron // 8 /// ENST00000561930 // antisense // intron // 1 /// ENST00000562119 // antisense // intron // 4 /// ENST00000563679…	---	miRBase
MIMAT0000073_st	hsa-miR-19a-3p	0.304874	0.370746	0.992346	0.494317	-0.00897733	0.279024	0.494317	1.00936	0.17531	MIMAT0000073	miRNA	Homo sapiens	chr13:92003193-92003215 (+)	23	UGUGCAAAUCUAUGCAAAACUGA	ENST00000400282 // sense // intron // 3 /// ENST00000581816 // sense // exon // 3 /// ENST00000582141 // sense // exon // 2 /// OTTHUMT00000045448 // sense // intron // 3 /// OTTHUMT00000442497 // sense // exon // 2 /// OTTHUMT00000442498 // sense // exon // 3	hsa-mir-17 // chr13:92002859-92002942 (+) /// hsa-mir-18a // chr13:92003005-92003075 (+) /// hsa-mir-19a // chr13:92003145-92003226 (+) /// hsa-mir-19b-1 // chr13:92003446-92003532 (+) /// hsa-mir-20a // chr13:92003319-92003389 (+) /// hsa-mir-92a-1 // chr13:92003568-92003645 (+)	miRBase
MIMAT0000074_st	hsa-miR-19b-3p	0.165985	0.542183	0.992346	0.444723	0.39078	0.0944136	0.463635	0.371867	0.592368	MIMAT0000074	miRNA	Homo sapiens	chr13:92003499-92003521 (+) /// chrX:133303713-133303735 (-)	23	UGUGCAAAUCCAUGCAAAACUGA	ENST00000400282 // sense // intron // 3 /// ENST00000581816 // sense // exon // 3 /// ENST00000582141 // sense // exon // 2 /// OTTHUMT00000045448 // sense // intron // 3 /// OTTHUMT00000442497 // sense // exon // 2 /// OTTHUMT00000442498 // sense // exon // 3 /// ENST00000385077 // sense // exon // 1	hsa-mir-17 // chr13:92002859-92002942 (+) /// hsa-mir-18a // chr13:92003005-92003075 (+) /// hsa-mir-19a // chr13:92003145-92003226 (+) /// hsa-mir-19b-1 // chr13:92003446-92003532 (+) /// hsa-mir-20a // chr13:92003319-92003389 (+) /// hsa-mir-92a-1 // chr13:92003568-92003645 (+) /// hsa-mir-19b-2 // chrX:133303701-133303796 (-) /// hsa-mir-92a-2 // chrX:133303568-133303642 (-) /// hsa-mir-106a /…	miRBase
MIMAT0001620_st	hsa-miR-200a-5p	0.451879	0.346227	0.992346	0.731273	1.20852	0.770247	1.26132	0.556839	2.24753	MIMAT0001620	miRNA	Homo sapiens	chr1:1103258-1103279 (+)	22	CAUCUUACCGGACAGUGCUGGA	---	hsa-mir-200b // chr1:1102484-1102578 (+) /// hsa-mir-200a // chr1:1103243-1103332 (+) /// hsa-mir-429 // chr1:1104385-1104467 (+)	miRBase
MIMAT0004571_st	hsa-miR-200b-5p	0.549354	0.186252	0.992346	0.329354	1.01448	1.66852	1.44203	1.66852	1.54987	MIMAT0004571	miRNA	Homo sapiens	chr1:1102504-1102525 (+)	22	CAUCUUACUGGGCAGCAUUGGA	---	hsa-mir-200b // chr1:1102484-1102578 (+) /// hsa-mir-200a // chr1:1103243-1103332 (+) /// hsa-mir-429 // chr1:1104385-1104467 (+)	miRBase
MIMAT0002811_st	hsa-miR-202-3p	0.454794	0.308384	0.992346	-0.0619795	1.30268	0.427951	1.24795	0.55893	1.22616	MIMAT0002811	miRNA	Homo sapiens	chr10:135061042-135061061 (-)	20	AGAGGUAUAGGGCAUGGGAA	ENST00000300167 // sense // intron // 2 /// ENST00000553459 // sense // intron // 1 /// OTTHUMT00000409805 // sense // intron // 1 /// OTTHUMT00000409806 // sense // intron // 2	---	miRBase
MIMAT0002810_st	hsa-miR-202-5p	0.258162	0.549549	0.992346	0.103082	0.459782	1.55987	1.16874	0.938139	0.790349	MIMAT0002810	miRNA	Homo sapiens	chr10:135061076-135061097 (-)	22	UUCCUAUGCAUAUACUUCUUUG	ENST00000300167 // sense // intron // 2 /// ENST00000553459 // sense // intron // 1 /// OTTHUMT00000409805 // sense // intron // 1 /// OTTHUMT00000409806 // sense // intron // 2	---	miRBase
MIMAT0022693_st	hsa-miR-204-3p	0.597338	0.0906205	0.992346	0.250575	0.115416	0.611128	1.21575	0.51936	1.03402	MIMAT0022693	miRNA	Homo sapiens	chr9:73424909-73424929 (-)	21	GCUGGGAAGGCAAAGGGACGU	ENST00000357533 // sense // intron // 6 /// ENST00000358082 // sense // intron // 5 /// ENST00000360823 // sense // intron // 7 /// ENST00000361823 // sense // intron // 6 /// ENST00000377101 // sense // intron // 6 /// ENST00000377105 // sense // intron // 6 /// ENST00000377106 // sense // intron // 7 /// ENST00000377110 // sense // intron // 6 /// ENST00000377111 // sense // intron // 6 /// ENS…	---	miRBase
MIMAT0000462_st	hsa-miR-206	-0.478705	0.635482	0.992346	4.08009	2.33117	2.12091	4.21752	0.371867	2.50667	MIMAT0000462	miRNA	Homo sapiens	chr6:52009199-52009220 (+)	22	UGGAAUGUAAGGAAGUGUGUGG	---	hsa-mir-206 // chr6:52009147-52009232 (+) /// hsa-mir-133b // chr6:52013721-52013839 (+)	miRBase
MIMAT0000075_st	hsa-miR-20a-5p	0.22883	0.668123	0.992346	0.336607	1.45065	1.24296	1.01297	0.491473	2.21227	MIMAT0000075	miRNA	Homo sapiens	chr13:92003326-92003348 (+)	23	UAAAGUGCUUAUAGUGCAGGUAG	ENST00000400282 // sense // intron // 3 /// ENST00000581816 // sense // exon // 3 /// ENST00000582141 // sense // exon // 2 /// OTTHUMT00000045448 // sense // intron // 3 /// OTTHUMT00000442497 // sense // exon // 2 /// OTTHUMT00000442498 // sense // exon // 3	hsa-mir-17 // chr13:92002859-92002942 (+) /// hsa-mir-18a // chr13:92003005-92003075 (+) /// hsa-mir-19a // chr13:92003145-92003226 (+) /// hsa-mir-19b-1 // chr13:92003446-92003532 (+) /// hsa-mir-20a // chr13:92003319-92003389 (+) /// hsa-mir-92a-1 // chr13:92003568-92003645 (+)	miRBase
MIMAT0004752_st	hsa-miR-20b-3p	0.089556	0.787859	0.992346	0.222466	0.671184	1.17814	0.751245	0.918032	0.671184	MIMAT0004752	miRNA	Homo sapiens	chrX:133303843-133303864 (-)	22	ACUGUAGUAUGGGCACUUCCAG	---	hsa-mir-19b-2 // chrX:133303701-133303796 (-) /// hsa-mir-92a-2 // chrX:133303568-133303642 (-) /// hsa-mir-106a // chrX:133304228-133304308 (-) /// hsa-mir-363 // chrX:133303408-133303482 (-) /// hsa-mir-18b // chrX:133304071-133304141 (-) /// hsa-mir-20b // chrX:133303839-133303907 (-)	miRBase
MIMAT0009206_st	hsa-miR-2113	-0.665694	0.0419098	0.992346	1.22268	0.957564	0.839058	0.104838	0.442867	0.474512	MIMAT0009206	miRNA	Homo sapiens	chr6:98472462-98472482 (+)	21	AUUUGUGCUUGGCUCUGUCAC	---	---	miRBase
MIMAT0011158_st	hsa-miR-2115-5p	-0.3596	0.364774	0.992346	7.21032	7.19086	7.7995	6.78197	7.69172	6.64818	MIMAT0011158	miRNA	Homo sapiens	chr3:48357908-48357929 (-)	22	AGCUUCCAUGACUCCUGAUGGA	ENST00000434006 // sense // intron // 3 /// OTTHUMT00000346123 // sense // intron // 3	---	miRBase
MIMAT0000269_st	hsa-miR-212-3p	0.425263	0.131111	0.992346	0.613575	0.450934	0.463635	1.04036	0.952092	0.811488	MIMAT0000269	miRNA	Homo sapiens	chr17:1953584-1953604 (-)	21	UAACAGUCUCCAGUCACGGCC	---	hsa-mir-212 // chr17:1953565-1953674 (-) /// hsa-mir-132 // chr17:1953202-1953302 (-)	miRBase
MIMAT0022695_st	hsa-miR-212-5p	0.251109	0.499726	0.992346	0.79318	1.59883	1.37271	1.14659	1.99875	1.37271	MIMAT0022695	miRNA	Homo sapiens	chr17:1953622-1953644 (-)	23	ACCUUGGCUCUAGACUGCUUACU	---	hsa-mir-212 // chr17:1953565-1953674 (-) /// hsa-mir-132 // chr17:1953202-1953302 (-)	miRBase
MIMAT0004675_st	hsa-miR-219a-2-3p	-0.321866	0.460841	0.992346	0.395103	1.668	0.238452	0.395103	0.395103	0.545746	MIMAT0004675	miRNA	Homo sapiens	chr9:131154911-131154932 (-)	22	AGAAUUGUGGCUGGACAUCUGU	---	hsa-mir-219a-2 // chr9:131154897-131154993 (-) /// hsa-mir-219b // chr9:131154900-131154987 (+)	miRBase
MIMAT0000279_st	hsa-miR-222-3p	0.334453	0.253745	0.992346	0.790099	0.851175	0.542057	1.05413	1.2935	0.839058	MIMAT0000279	miRNA	Homo sapiens	chrX:45606442-45606462 (-)	21	AGCUACAUCUGGCUACUGGGU	ENST00000602461 // sense // intron // 1 /// OTTHUMT00000467990 // sense // intron // 1	hsa-mir-221 // chrX:45605585-45605694 (-) /// hsa-mir-222 // chrX:45606421-45606530 (-)	miRBase
MIMAT0011777_st	hsa-miR-2277-3p	-0.318298	0.490985	0.992346	0.523649	1.89724	1.2466	0.919163	0.376821	1.41661	MIMAT0011777	miRNA	Homo sapiens	chr5:92956416-92956436 (-)	21	UGACAGCGCCCUGCCUGGCUC	ENST00000395965 // sense // 3UTR // 11 /// ENST00000505869 // sense // 3UTR // 9 /// OTTHUMT00000254100 // sense // 3UTR // 11 /// OTTHUMT00000369882 // sense // 3UTR // 9	---	miRBase
MIMAT0017352_st	hsa-miR-2277-5p	-0.226858	0.642012	0.992346	2.00202	2.78318	3.49426	2.35471	3.17606	2.06812	MIMAT0017352	miRNA	Homo sapiens	chr5:92956454-92956477 (-)	24	AGCGCGGGCUGAGCGCUGCCAGUC	ENST00000395965 // sense // 3UTR // 11 /// ENST00000505869 // sense // 3UTR // 9 /// OTTHUMT00000254100 // sense // 3UTR // 11 /// OTTHUMT00000369882 // sense // 3UTR // 9	---	miRBase
MIMAT0011778_st	hsa-miR-2278	-0.253563	0.73215	0.992346	2.73149	3.04427	1.74885	3.51382	0.705586	2.5445	MIMAT0011778	miRNA	Homo sapiens	chr9:97572259-97572280 (+)	22	GAGAGCAGUGUGUGUUGCCUGG	ENST00000277198 // sense // intron // 5 /// ENST00000297979 // sense // intron // 5 /// ENST00000375315 // sense // intron // 4 /// ENST00000395357 // sense // intron // 2 /// ENST00000424143 // sense // intron // 4 /// ENST00000428313 // sense // intron // 4 /// OTTHUMT00000053197 // sense // intron // 5 /// OTTHUMT00000053199 // sense // intron // 5 /// OTTHUMT00000053201 // sense // intron // …	---	miRBase
MIMAT0019043_st	hsa-miR-2392	-0.529984	0.155563	0.992346	3.77692	3.45829	3.25119	3.30325	2.42196	3.17124	MIMAT0019043	miRNA	Homo sapiens	chr14:101280888-101280907 (+)	20	UAGGAUGGGGGUGAGAGGUG	ENST00000556407 // sense // intron // 1 /// OTTHUMT00000414682 // sense // intron // 1	---	miRBase
MIMAT0000078_st	hsa-miR-23a-3p	0.399335	0.193356	0.992346	4.50059	4.6987	4.71883	4.77624	4.97212	5.36776	MIMAT0000078	miRNA	Homo sapiens	chr19:13947409-13947429 (-)	21	AUCACAUUGCCAGGGAUUUCC	---	hsa-mir-23a // chr19:13947401-13947473 (-) /// hsa-mir-24-2 // chr19:13947101-13947173 (-) /// hsa-mir-27a // chr19:13947254-13947331 (-)	miRBase
MIMAT0004496_st	hsa-miR-23a-5p	0.318698	0.478246	0.992346	1.96749	0.709323	1.45684	1.86552	1.10155	2.12267	MIMAT0004496	miRNA	Homo sapiens	chr19:13947444-13947465 (-)	22	GGGGUUCCUGGGGAUGGGAUUU	---	hsa-mir-23a // chr19:13947401-13947473 (-) /// hsa-mir-24-2 // chr19:13947101-13947173 (-) /// hsa-mir-27a // chr19:13947254-13947331 (-)	miRBase
MIMAT0000418_st	hsa-miR-23b-3p	0.773299	0.185631	0.992346	1.94024	3.0356	2.47578	2.16893	3.59955	4.00304	MIMAT0000418	miRNA	Homo sapiens	chr9:97847547-97847567 (+)	21	AUCACAUUGCCAGGGAUUACC	ENST00000297979 // sense // intron // 14 /// ENST00000375315 // sense // intron // 15 /// ENST00000428313 // sense // intron // 15 /// ENST00000463372 // sense // intron // 5 /// ENST00000468164 // sense // intron // 4 /// ENST00000471978 // sense // intron // 5 /// ENST00000478473 // sense // intron // 6 /// OTTHUMT00000053196 // sense // intron // 5 /// OTTHUMT00000053197 // sense // intron // …	hsa-mir-24-1 // chr9:97848303-97848370 (+) /// hsa-mir-23b // chr9:97847490-97847586 (+) /// hsa-mir-27b // chr9:97847727-97847823 (+) /// hsa-mir-3074 // chr9:97848296-97848376 (-)	miRBase
MIMAT0004587_st	hsa-miR-23b-5p	-0.138313	0.736409	0.992346	-0.00354202	0.448404	1.35535	0.448404	0.219494	0.717378	MIMAT0004587	miRNA	Homo sapiens	chr9:97847509-97847530 (+)	22	UGGGUUCCUGGCAUGCUGAUUU	ENST00000297979 // sense // intron // 14 /// ENST00000375315 // sense // intron // 15 /// ENST00000428313 // sense // intron // 15 /// ENST00000463372 // sense // intron // 5 /// ENST00000468164 // sense // intron // 4 /// ENST00000471978 // sense // intron // 5 /// ENST00000478473 // sense // intron // 6 /// OTTHUMT00000053196 // sense // intron // 5 /// OTTHUMT00000053197 // sense // intron // …	hsa-mir-24-1 // chr9:97848303-97848370 (+) /// hsa-mir-23b // chr9:97847490-97847586 (+) /// hsa-mir-27b // chr9:97847727-97847823 (+) /// hsa-mir-3074 // chr9:97848296-97848376 (-)	miRBase
MIMAT0000080_st	hsa-miR-24-3p	-0.906132	0.0453856	0.992346	2.56584	3.85584	3.42615	2.57044	2.24631	2.31268	MIMAT0000080	miRNA	Homo sapiens	chr19:13947103-13947124 (-) /// chr9:97848346-97848367 (+)	22	UGGCUCAGUUCAGCAGGAACAG	ENST00000297979 // sense // intron // 14 /// ENST00000375315 // sense // intron // 15 /// ENST00000384885 // antisense // exon // 1 /// ENST00000428313 // sense // intron // 15 /// ENST00000463372 // sense // intron // 5 /// ENST00000468164 // sense // intron // 4 /// ENST00000471978 // sense // intron // 5 /// ENST00000478473 // sense // exon // 7 /// OTTHUMT00000053196 // sense // intron // 5 /…	hsa-mir-24-1 // chr9:97848303-97848370 (+) /// hsa-mir-23b // chr9:97847490-97847586 (+) /// hsa-mir-27b // chr9:97847727-97847823 (+) /// hsa-mir-3074 // chr9:97848296-97848376 (-) /// hsa-mir-23a // chr19:13947401-13947473 (-) /// hsa-mir-24-2 // chr19:13947101-13947173 (-) /// hsa-mir-27a // chr19:13947254-13947331 (-)	miRBase
MIMAT0000081_st	hsa-miR-25-3p	0.452225	0.245271	0.992346	-0.323698	0.568132	0.568132	0.367311	0.743126	1.0588	MIMAT0000081	miRNA	Homo sapiens	chr7:99691194-99691215 (-)	22	CAUUGCACUUGUCUCGGUCUGA	ENST00000303887 // sense // intron // 13 /// ENST00000343023 // sense // intron // 8 /// ENST00000354230 // sense // intron // 12 /// ENST00000485286 // sense // intron // 12 /// ENST00000489841 // sense // intron // 12 /// ENST00000491245 // sense // intron // 4 /// ENST00000493352 // sense // intron // 2 /// OTTHUMT00000336534 // sense // intron // 13 /// OTTHUMT00000336598 // sense // intron /…	hsa-mir-25 // chr7:99691183-99691266 (-) /// hsa-mir-93 // chr7:99691391-99691470 (-) /// hsa-mir-106b // chr7:99691616-99691697 (-)	miRBase
MIMAT0004498_st	hsa-miR-25-5p	0.185348	0.723517	0.992346	0.796979	1.96723	0.463635	1.60706	0.480817	1.69601	MIMAT0004498	miRNA	Homo sapiens	chr7:99691233-99691253 (-)	21	AGGCGGAGACUUGGGCAAUUG	ENST00000303887 // sense // intron // 13 /// ENST00000343023 // sense // intron // 8 /// ENST00000354230 // sense // intron // 12 /// ENST00000485286 // sense // intron // 12 /// ENST00000489841 // sense // intron // 12 /// ENST00000491245 // sense // intron // 4 /// ENST00000493352 // sense // intron // 2 /// OTTHUMT00000336534 // sense // intron // 13 /// OTTHUMT00000336598 // sense // intron /…	hsa-mir-25 // chr7:99691183-99691266 (-) /// hsa-mir-93 // chr7:99691391-99691470 (-) /// hsa-mir-106b // chr7:99691616-99691697 (-)	miRBase
MIMAT0000082_st	hsa-miR-26a-5p	0.736185	0.0662326	0.992346	0.901913	1.5605	1.76456	2.33102	1.74885	2.35566	MIMAT0000082	miRNA	Homo sapiens	chr12:58218441-58218462 (-) /// chr3:38010904-38010925 (+)	22	UUCAAGUAAUCCAGGAUAGGCU	ENST00000273179 // sense // intron // 5 /// ENST00000310189 // sense // intron // 4 /// ENST00000443503 // sense // intron // 4 /// ENST00000447745 // sense // intron // 2 /// ENST00000486978 // sense // intron // 5 /// OTTHUMT00000342392 // sense // intron // 5 /// OTTHUMT00000342393 // sense // intron // 5 /// OTTHUMT00000342394 // sense // intron // 4 /// OTTHUMT00000342397 // sense // intron …	---	miRBase
MIMAT0004500_st	hsa-miR-26b-3p	0.418991	0.164199	0.992346	0.63689	0.448423	0.63689	1.20842	1.07267	0.698083	MIMAT0004500	miRNA	Homo sapiens	chr2:219267415-219267436 (+)	22	CCUGUUCUCCAUUACUUGGCUC	ENST00000273062 // sense // intron // 4 /// ENST00000428361 // sense // intron // 4 /// ENST00000443891 // sense // intron // 4 /// ENST00000452977 // sense // intron // 4 /// ENST00000464255 // sense // intron // 4 /// ENST00000473420 // sense // intron // 4 /// ENST00000482272 // sense // intron // 3 /// ENST00000488627 // sense // intron // 4 /// ENST00000491064 // sense // intron // 4 /// ENS…	---	miRBase
MIMAT0004588_st	hsa-miR-27b-5p	0.175009	0.671397	0.992346	1.09281	1.3098	0.496229	1.70581	0.502297	1.21575	MIMAT0004588	miRNA	Homo sapiens	chr9:97847745-97847766 (+)	22	AGAGCUUAGCUGAUUGGUGAAC	ENST00000297979 // sense // intron // 14 /// ENST00000375315 // sense // intron // 15 /// ENST00000428313 // sense // intron // 15 /// ENST00000463372 // sense // intron // 5 /// ENST00000468164 // sense // intron // 4 /// ENST00000471978 // sense // intron // 5 /// ENST00000478473 // sense // intron // 6 /// OTTHUMT00000053196 // sense // intron // 5 /// OTTHUMT00000053197 // sense // intron // …	hsa-mir-24-1 // chr9:97848303-97848370 (+) /// hsa-mir-23b // chr9:97847490-97847586 (+) /// hsa-mir-27b // chr9:97847727-97847823 (+) /// hsa-mir-3074 // chr9:97848296-97848376 (-)	miRBase
MIMAT0013802_st	hsa-miR-2861	0.153869	0.621377	0.992346	6.51039	6.84125	6.14093	6.74913	6.40793	6.79712	MIMAT0013802	miRNA	Homo sapiens	chr9:130548250-130548268 (+)	19	GGGGCCUGGCGGUGGGCGG	ENST00000373265 // sense // 3UTR // 1 /// ENST00000421939 // sense // 3UTR // 1 /// ENST00000583311 // sense // exon // 1 /// OTTHUMT00000054239 // sense // 3UTR // 1	hsa-mir-2861 // chr9:130548197-130548286 (+) /// hsa-mir-3960 // chr9:130548112-130548202 (+)	miRBase
MIMAT0004679_st	hsa-miR-296-3p	0.374193	0.56695	0.992346	3.62415	2.95927	1.04917	2.88259	2.7219	3.15067	MIMAT0004679	miRNA	Homo sapiens	chr20:57392681-57392702 (-)	22	GAGGGUUGGGUGGAGGCUCUCC	ENST00000596276 // sense // exon // 1 /// OTTHUMT00000465468 // sense // exon // 1	hsa-mir-296 // chr20:57392670-57392749 (-) /// hsa-mir-298 // chr20:57393281-57393368 (-)	miRBase
MIMAT0004450_st	hsa-miR-297	-0.427175	0.312134	0.992346	7.59258	7.1866	6.61002	7.16698	6.11365	6.82703	MIMAT0004450	miRNA	Homo sapiens	chr4:111781780-111781800 (-)	21	AUGUAUGUGUGCAUGUGCAUG	---	---	miRBase
MIMAT0002890_st	hsa-miR-299-5p	0.0662762	0.802083	0.992346	0.383338	0.107659	0.460188	0.383338	0.383338	0.383338	MIMAT0002890	miRNA	Homo sapiens	chr14:101490137-101490158 (+)	22	UGGUUUACCGUCCCACAUACAU	ENST00000385016 // sense // exon // 1	hsa-mir-299 // chr14:101490131-101490193 (+) /// hsa-mir-379 // chr14:101488403-101488469 (+) /// hsa-mir-380 // chr14:101491354-101491414 (+) /// hsa-mir-323a // chr14:101492069-101492154 (+) /// hsa-mir-329-1 // chr14:101493122-101493201 (+) /// hsa-mir-329-2 // chr14:101493437-101493520 (+) /// hsa-mir-494 // chr14:101495971-101496051 (+) /// hsa-mir-495 // chr14:101500092-101500173 (+) /// hs…	miRBase
MIMAT0004903_st	hsa-miR-300	0.204952	0.552517	0.992346	0.332094	0.249825	0.501634	1.07316	0.0564147	0.568832	MIMAT0004903	miRNA	Homo sapiens	chr14:101507751-101507772 (+)	22	UAUACAAGGGCAGACUCUCUCU	---	hsa-mir-376c // chr14:101506027-101506092 (+) /// hsa-mir-376a-1 // chr14:101507119-101507186 (+) /// hsa-mir-381 // chr14:101512257-101512331 (+) /// hsa-mir-376b // chr14:101506773-101506872 (+) /// hsa-mir-495 // chr14:101500092-101500173 (+) /// hsa-mir-539 // chr14:101513658-101513735 (+) /// hsa-mir-544a // chr14:101514995-101515085 (+) /// hsa-mir-376a-2 // chr14:101506406-101506485 (+) //…	miRBase
MIMAT0019864_st	hsa-miR-3064-5p	-0.245042	0.791088	0.992346	5.59302	5.13331	2.6213	5.31101	2.87356	4.42793	MIMAT0019864	miRNA	Homo sapiens	chr17:62496935-62496955 (-)	21	UCUGGCUGUUGUGGUGUGCAA	ENST00000225792 // sense // intron // 11 /// ENST00000450599 // sense // intron // 10 /// ENST00000540698 // sense // intron // 10 /// ENST00000578491 // sense // exon // 5 /// ENST00000578758 // sense // intron // 2 /// ENST00000578804 // sense // intron // 11 /// ENST00000580026 // sense // intron // 2 /// ENST00000581130 // sense // exon // 1 /// ENST00000581230 // sense // exon // 11 /// ENST…	hsa-mir-3064 // chr17:62496892-62496957 (-) /// hsa-mir-5047 // chr17:62497332-62497431 (-)	miRBase
MIMAT0000089_st	hsa-miR-31-5p	0.183413	0.611501	0.992346	0.237812	0.330239	0.622147	0.00153024	0.656548	1.08236	MIMAT0000089	miRNA	Homo sapiens	chr9:21512157-21512177 (-)	21	AGGCAAGAUGCUGGCAUAGCU	ENST00000304425 // sense // intron // 1 /// OTTHUMT00000051910 // sense // intron // 1	---	miRBase
MIMAT0019198_st	hsa-miR-3120-5p	-0.341632	0.435373	0.992346	0.320692	1.50905	1.24096	1.24096	0.362711	0.442134	MIMAT0019198	miRNA	Homo sapiens	chr1:172107960-172107980 (+)	21	CCUGUCUGUGCCUGCUGUACA	ENST00000355305 // sense // intron // 15 /// ENST00000358155 // sense // intron // 14 /// ENST00000367731 // sense // intron // 14 /// ENST00000385214 // antisense // exon // 1 /// ENST00000520906 // sense // intron // 14 /// ENST00000523513 // sense // intron // 13 /// OTTHUMT00000084529 // sense // intron // 14 /// OTTHUMT00000084531 // sense // intron // 15 /// OTTHUMT00000378443 // sense // i…	hsa-mir-199a-2 // chr1:172113675-172113784 (-) /// hsa-mir-214 // chr1:172107938-172108047 (-) /// hsa-mir-3120 // chr1:172107948-172108028 (+)	miRBase
MIMAT0014983_st	hsa-miR-3121-3p	-0.772644	0.0193269	0.992346	0.940848	1.06866	1.3338	0.405617	0.250447	0.369319	MIMAT0014983	miRNA	Homo sapiens	chr1:180407458-180407479 (-)	22	UAAAUAGAGUAGGCAAAGGACA	ENST00000367595 // sense // intron // 3 /// OTTHUMT00000084998 // sense // intron // 3	---	miRBase
MIMAT0014986_st	hsa-miR-3124-5p	0.527511	0.28531	0.992346	1.19686	2.49299	2.70593	2.29844	2.57384	3.10604	MIMAT0014986	miRNA	Homo sapiens	chr1:249120582-249120602 (+)	21	UUCGCGGGCGAAGGCAAAGUC	ENST00000366472 // antisense // 5UTR // 1 /// OTTHUMT00000097140 // antisense // 5UTR // 1	---	miRBase
MIMAT0014991_st	hsa-miR-3128	1.13185	0.168746	0.992346	0.157176	2.61993	2.92235	3.41814	3.39543	2.28145	MIMAT0014991	miRNA	Homo sapiens	chr2:178120712-178120734 (-)	23	UCUGGCAAGUAAAAAACUCUCAU	ENST00000397062 // sense // intron // 1 /// ENST00000397063 // sense // intron // 1 /// ENST00000421929 // sense // intron // 1 /// ENST00000423513 // sense // intron // 1 /// ENST00000430047 // sense // intron // 1 /// ENST00000446151 // sense // intron // 1 /// ENST00000448782 // sense // intron // 1 /// ENST00000449627 // sense // intron // 1 /// ENST00000462023 // sense // intron // 1 /// ENS…	---	miRBase
MIMAT0014996_st	hsa-miR-3131	0.142144	0.757874	0.992346	1.19005	1.9067	0.780073	2.18997	0.938669	1.17462	MIMAT0014996	miRNA	Homo sapiens	chr2:219923447-219923469 (-)	23	UCGAGGACUGGUGGAAGGGCCUU	ENST00000295731 // sense // intron // 1 /// OTTHUMT00000336408 // sense // intron // 1	---	miRBase
MIMAT0018985_st	hsa-miR-3135b	0.247944	0.483162	0.992346	4.47554	4.15898	3.52506	4.51015	4.01843	4.37484	MIMAT0018985	miRNA	Homo sapiens	chr6:32717729-32717750 (-)	22	GGCUGGAGCGAGUGCAGUGGUG	---	---	miRBase
MIMAT0015003_st	hsa-miR-3136-5p	0.072295	0.791496	0.992346	0.321557	0.484077	0.0131526	0.302417	0.392309	0.340947	MIMAT0015003	miRNA	Homo sapiens	chr3:69098155-69098177 (-)	23	CUGACUGAAUAGGUAGGGUCAUU	ENST00000398559 // sense // intron // 1 /// ENST00000488010 // sense // intron // 1 /// ENST00000543976 // sense // intron // 1 /// ENST00000595925 // antisense // intron // 2 /// OTTHUMT00000352106 // sense // intron // 1 /// OTTHUMT00000352107 // sense // intron // 1 /// OTTHUMT00000461519 // antisense // intron // 2	---	miRBase
MIMAT0015010_st	hsa-miR-3141	-0.103227	0.764617	0.992346	5.38552	5.68266	5.22228	4.8793	5.8347	5.26678	MIMAT0015010	miRNA	Homo sapiens	chr5:153975605-153975623 (-)	19	GAGGGCGGGUGGAGGAGGA	---	---	miRBase
MIMAT0015019_st	hsa-miR-3147	-0.49182	0.429359	0.992346	3.10091	3.43687	3.23669	3.79155	1.37403	3.13343	MIMAT0015019	miRNA	Homo sapiens	chr7:57472736-57472759 (+)	24	GGUUGGGCAGUGAGGAGGGUGUGA	---	---	miRBase
MIMAT0015021_st	hsa-miR-3148	-0.652389	0.324718	0.992346	5.61976	4.7714	4.5462	5.2559	2.95448	4.76982	MIMAT0015021	miRNA	Homo sapiens	chr8:29814834-29814855 (-)	22	UGGAAAAAACUGGUGUGUGCUU	---	---	miRBase
MIMAT0015022_st	hsa-miR-3149	-0.939875	0.231207	0.992346	3.6284	3.30921	2.52286	3.6259	0.65379	2.36115	MIMAT0015022	miRNA	Homo sapiens	chr8:77879014-77879036 (-)	23	UUUGUAUGGAUAUGUGUGUGUAU	---	---	miRBase
MIMAT0015024_st	hsa-miR-3151-5p	0.0657619	0.880681	0.998769	0.839058	2.26226	1.0579	1.19105	1.74885	1.41661	MIMAT0015024	miRNA	Homo sapiens	chr8:104166851-104166871 (+)	21	GGUGGGGCAAUGGGAUCAGGU	ENST00000297574 // sense // intron // 1 /// ENST00000306391 // sense // intron // 1 /// ENST00000309982 // sense // intron // 1 /// ENST00000330955 // sense // intron // 1 /// ENST00000438105 // sense // intron // 1 /// ENST00000519507 // sense // intron // 1 /// OTTHUMT00000380255 // sense // intron // 1 /// OTTHUMT00000380256 // sense // intron // 1 /// OTTHUMT00000380257 // sense // intron // …	---	miRBase
MIMAT0015025_st	hsa-miR-3152-3p	0.320864	0.420501	0.992346	0.228339	1.26011	0.497751	1.1861	0.506538	1.25616	MIMAT0015025	miRNA	Homo sapiens	chr9:18573348-18573369 (+)	22	UGUGUUAGAAUAGGGGCAAUAA	ENST00000276935 // sense // intron // 3 /// ENST00000327883 // sense // intron // 3 /// ENST00000380548 // sense // intron // 3 /// ENST00000380566 // sense // intron // 3 /// ENST00000380570 // sense // intron // 3 /// ENST00000431052 // sense // intron // 3 /// OTTHUMT00000051800 // sense // intron // 3 /// OTTHUMT00000051801 // sense // intron // 3 /// OTTHUMT00000051802 // sense // intron // …	---	miRBase
MIMAT0015026_st	hsa-miR-3153	-0.183718	0.559087	0.992346	0.157436	0.408424	0.918932	0.408424	0.388886	0.136329	MIMAT0015026	miRNA	Homo sapiens	chr9:91927189-91927211 (+)	23	GGGGAAAGCGAGUAGGGACAUUU	ENST00000314355 // sense // intron // 1 /// OTTHUMT00000052988 // sense // intron // 1	---	miRBase
MIMAT0015028_st	hsa-miR-3154	-0.0764908	0.833935	0.992346	1.44493	0.463635	0.971332	1.2347	0.873981	0.541746	MIMAT0015028	miRNA	Homo sapiens	chr9:131007235-131007256 (-)	22	CAGAAGGGGAGUUGGGAGCAGA	ENST00000341179 // antisense // intron // 15 /// ENST00000372923 // antisense // intron // 15 /// ENST00000393594 // antisense // intron // 15 /// ENST00000441149 // antisense // intron // 14 /// ENST00000475805 // antisense // intron // 15 /// ENST00000479174 // antisense // intron // 2 /// ENST00000486160 // antisense // intron // 15 /// ENST00000493925 // antisense // intron // 2 /// OTTHUMT00…	hsa-mir-199b // chr9:131007000-131007109 (-) /// hsa-mir-3154 // chr9:131007226-131007309 (-)	miRBase
MIMAT0019210_st	hsa-miR-3157-3p	0.125017	0.827659	0.992346	2.06604	0.835041	0.765667	2.32936	1.19799	0.514458	MIMAT0019210	miRNA	Homo sapiens	chr10:97824078-97824099 (-)	22	CUGCCCUAGUCUAGCUGAAGCU	ENST00000416301 // sense // intron // 2 /// ENST00000427846 // sense // intron // 2 /// ENST00000451364 // sense // intron // 2 /// ENST00000452728 // sense // intron // 2 /// ENST00000454638 // sense // intron // 2 /// ENST00000458228 // sense // intron // 2 /// OTTHUMT00000049575 // sense // intron // 2 /// OTTHUMT00000049576 // sense // intron // 2 /// OTTHUMT00000049577 // sense // intron // …	---	miRBase
MIMAT0019211_st	hsa-miR-3158-5p	1.03984	0.0619772	0.992346	0.924316	2.17586	2.00179	2.97955	1.97944	3.26251	MIMAT0019211	miRNA	Homo sapiens	chr10:103361186-103361206 (+) /// chr10:103361222-103361242 (-)	21	CCUGCAGAGAGGAAGCCCUUC	ENST00000370147 // sense // intron // 4 /// ENST00000370148 // sense // intron // 4 /// ENST00000370151 // sense // intron // 4 /// ENST00000434727 // sense // intron // 3 /// ENST00000475443 // sense // intron // 2 /// OTTHUMT00000049958 // sense // intron // 4 /// OTTHUMT00000049959 // sense // intron // 4 /// OTTHUMT00000049961 // sense // intron // 3 /// OTTHUMT00000049962 // sense // intron …	hsa-mir-3158-1 // chr10:103361174-103361254 (+) /// hsa-mir-3158-2 // chr10:103361174-103361254 (-) /// hsa-mir-3158-1 // chr10:103361174-103361254 (+) /// hsa-mir-3158-2 // chr10:103361174-103361254 (-)	miRBase
MIMAT0015036_st	hsa-miR-3162-5p	0.454535	0.228822	0.992346	4.28817	4.20274	3.2658	4.3768	4.50214	4.24137	MIMAT0015036	miRNA	Homo sapiens	chr11:59362600-59362622 (-)	23	UUAGGGAGUAGAAGGGUGGGGAG	ENST00000263847 // sense // intron // 7 /// ENST00000525357 // sense // intron // 2 /// ENST00000528903 // sense // intron // 1 /// OTTHUMT00000394555 // sense // intron // 7 /// OTTHUMT00000394557 // sense // intron // 2 /// OTTHUMT00000394558 // sense // intron // 1	---	miRBase
MIMAT0015052_st	hsa-miR-3175	-0.369943	0.371661	0.992346	4.43092	4.49666	3.66342	3.98154	3.22112	4.27852	MIMAT0015052	miRNA	Homo sapiens	chr15:93447638-93447659 (+)	22	CGGGGAGAGAACGCAGUGACGU	ENST00000309818 // sense // intron // 2 /// ENST00000394196 // sense // intron // 2 /// ENST00000420239 // sense // intron // 2 /// ENST00000536619 // sense // 3UTR // 1 /// ENST00000556722 // sense // intron // 5 /// ENST00000556930 // sense // intron // 3 /// ENST00000557381 // sense // intron // 2 /// OTTHUMT00000313528 // sense // intron // 2 /// OTTHUMT00000415070 // sense // intron // 5 ///…	---	miRBase
MIMAT0015055_st	hsa-miR-3178	-0.330738	0.237559	0.992346	11.9687	12.1397	11.9298	11.4936	11.7346	11.8178	MIMAT0015055	miRNA	Homo sapiens	chr16:2581980-2581996 (-)	17	GGGGCGCGGCCGGAUCG	---	---	miRBase
MIMAT0018178_st	hsa-miR-3180	0.341291	0.54916	0.992346	1.24935	3.09839	1.7735	1.74885	3.01934	2.37693	MIMAT0018178	miRNA	Homo sapiens	chr16:2186077-2186095 (-) /// chr16:15248806-15248824 (-)	19	UGGGGCGGAGCUUCCGGAG	ENST00000552015 // antisense // exon // 1 /// OTTHUMT00000409550 // antisense // exon // 1	hsa-mir-3180-5 // chr16:2185978-2186130 (-) /// hsa-mir-4516 // chr16:2183120-2183205 (+)	miRBase
MIMAT0015058_st	hsa-miR-3180-3p	-0.961183	0.0371212	0.992346	2.56584	2.25538	3.13615	1.45978	2.28523	1.32881	MIMAT0015058	miRNA	Homo sapiens	chr16:15005138-15005159 (+) /// chr16:16403793-16403814 (+) /// chr16:18496046-18496067 (-)	22	UGGGGCGGAGCUUCCGGAGGCC	ENST00000548268 // antisense // exon // 1 /// OTTHUMT00000409540 // antisense // exon // 1 /// ENST00000546612 // antisense // exon // 1 /// ENST00000581748 // sense // exon // 1 /// OTTHUMT00000409530 // antisense // exon // 1 /// ENST00000549796 // antisense // exon // 1 /// OTTHUMT00000409525 // antisense // exon // 1	hsa-mir-3179-1 // chr16:14995365-14995448 (+) /// hsa-mir-3180-1 // chr16:15005077-15005170 (+) /// hsa-mir-3670-1 // chr16:15001574-15001638 (+) /// hsa-mir-3180-2 // chr16:16403736-16403823 (+) /// hsa-mir-3179-2 // chr16:16394016-16394099 (+) /// hsa-mir-3670-2 // chr16:16400227-16400291 (+) /// hsa-mir-3180-3 // chr16:18496035-18496128 (-) /// hsa-mir-3179-3 // chr16:18505751-18505834 (-)	miRBase
MIMAT0015065_st	hsa-miR-3185	-0.193331	0.695043	0.992346	1.69691	2.56584	3.05999	2.43796	1.50747	2.79732	MIMAT0015065	miRNA	Homo sapiens	chr17:46801808-46801830 (-)	23	AGAAGAAGGCGGUCGGUCUGCGG	ENST00000422730 // antisense // exon // 2 /// ENST00000432056 // antisense // exon // 2 /// OTTHUMT00000255115 // antisense // exon // 2 /// OTTHUMT00000255116 // antisense // exon // 2	---	miRBase
MIMAT0015069_st	hsa-miR-3187-3p	0.333118	0.434042	0.992346	1.56564	2.30547	0.901913	1.79084	1.73401	2.24753	MIMAT0015069	miRNA	Homo sapiens	chr19:813627-813646 (+)	20	UUGGCCAUGGGGCUGCGCGG	ENST00000359894 // antisense // exon // 7 /// ENST00000520876 // antisense // exon // 8 /// OTTHUMT00000379096 // antisense // exon // 8 /// OTTHUMT00000379097 // antisense // exon // 7	hsa-mir-3187 // chr19:813584-813653 (+) /// hsa-mir-4745 // chr19:804940-805001 (+)	miRBase
MIMAT0019216_st	hsa-miR-3187-5p	0.0570068	0.873189	0.998769	3.42789	2.98642	2.48639	3.14466	2.64667	3.28038	MIMAT0019216	miRNA	Homo sapiens	chr19:813590-813612 (+)	23	CCUGGGCAGCGUGUGGCUGAAGG	ENST00000359894 // antisense // exon // 7 /// ENST00000520876 // antisense // exon // 8 /// OTTHUMT00000379096 // antisense // exon // 8 /// OTTHUMT00000379097 // antisense // exon // 7	hsa-mir-3187 // chr19:813584-813653 (+) /// hsa-mir-4745 // chr19:804940-805001 (+)	miRBase
MIMAT0015070_st	hsa-miR-3188	-0.00769816	0.993987	0.998769	3.98953	4.22807	0.463635	3.21187	1.97944	3.46683	MIMAT0015070	miRNA	Homo sapiens	chr19:18392939-18392961 (+)	23	AGAGGCUUUGUGCGGAUACGGGG	ENST00000596186 // sense // exon // 1 /// OTTHUMT00000466320 // sense // exon // 1	---	miRBase
MIMAT0015071_st	hsa-miR-3189-3p	-0.494203	0.149697	0.992346	0.285589	1.10861	0.539025	0.263623	0.193706	-0.0067145	MIMAT0015071	miRNA	Homo sapiens	chr19:18497417-18497437 (+)	21	CCCUUGGGUCUGAUGGGGUAG	ENST00000252809 // sense // intron // 1 /// ENST00000595973 // sense // intron // 2 /// OTTHUMT00000466340 // sense // intron // 2	---	miRBase
MIMAT0015073_st	hsa-miR-3190-5p	0.0439438	0.918463	0.998769	0.193559	1.46431	1.12562	0.901913	1.44322	0.57019	MIMAT0015073	miRNA	Homo sapiens	chr19:47730212-47730231 (+)	20	UCUGGCCAGCUACGUCCCCA	ENST00000300880 // antisense // intron // 1 /// ENST00000341983 // antisense // intron // 1 /// ENST00000439096 // antisense // intron // 2 /// ENST00000449228 // antisense // intron // 2 /// ENST00000598636 // antisense // exon // 1 /// OTTHUMT00000466871 // antisense // intron // 2 /// OTTHUMT00000466872 // antisense // intron // 1 /// OTTHUMT00000466873 // antisense // intron // 1 /// OTTHUMT0…	hsa-mir-3190 // chr19:47730199-47730278 (+) /// hsa-mir-3191 // chr19:47730201-47730276 (-)	miRBase
MIMAT0015079_st	hsa-miR-3195	0.715518	0.0592808	0.992346	0.804464	1.24114	0.463635	1.25228	1.86452	1.53899	MIMAT0015079	miRNA	Homo sapiens	chr20:60639868-60639884 (+)	17	CGCGCCGGGCCCGGGUU	ENST00000252996 // antisense // exon // 1 /// ENST00000436129 // antisense // exon // 3 /// OTTHUMT00000079968 // antisense // exon // 1 /// OTTHUMT00000079969 // antisense // exon // 3	---	miRBase
MIMAT0015080_st	hsa-miR-3196	0.0995801	0.766249	0.992346	5.7206	6.27364	6.18261	5.72349	6.52216	6.22994	MIMAT0015080	miRNA	Homo sapiens	chr20:61870140-61870157 (+)	18	CGGGGCGGCAGGGGCCUC	ENST00000217169 // sense // intron // 4 /// ENST00000342412 // sense // intron // 4 /// ENST00000395306 // sense // intron // 2 /// OTTHUMT00000080113 // sense // intron // 4 /// OTTHUMT00000080114 // sense // intron // 4 /// OTTHUMT00000080115 // sense // intron // 2	---	miRBase
MIMAT0015082_st	hsa-miR-3197	-0.36709	0.283811	0.992346	7.89453	7.7334	8.25746	7.14602	7.91776	7.72033	MIMAT0015082	miRNA	Homo sapiens	chr21:42539491-42539513 (+)	23	GGAGGCGCAGGCUCGGAAAGGCG	---	---	miRBase
MIMAT0004505_st	hsa-miR-32-3p	-0.769626	0.264581	0.992346	2.61868	2.51044	0.66051	2.00467	1.16078	0.3153	MIMAT0004505	miRNA	Homo sapiens	chr9:111808511-111808532 (-)	22	CAAUUUAGUGUGUGUGAUAUUU	ENST00000374586 // sense // intron // 14 /// ENST00000413712 // sense // intron // 8 /// ENST00000491854 // sense // intron // 12 /// OTTHUMT00000053587 // sense // intron // 14 /// OTTHUMT00000053588 // sense // intron // 12 /// OTTHUMT00000356304 // sense // intron // 8	---	miRBase
MIMAT0000090_st	hsa-miR-32-5p	0.155955	0.656315	0.992346	0.478889	0.485866	0.924144	0.463635	0.548964	1.34416	MIMAT0000090	miRNA	Homo sapiens	chr9:111808552-111808573 (-)	22	UAUUGCACAUUACUAAGUUGCA	ENST00000374586 // sense // intron // 14 /// ENST00000413712 // sense // intron // 8 /// ENST00000491854 // sense // intron // 12 /// OTTHUMT00000053587 // sense // intron // 14 /// OTTHUMT00000053588 // sense // intron // 12 /// OTTHUMT00000356304 // sense // intron // 8	---	miRBase
MIMAT0015086_st	hsa-miR-3201	1.44728	0.0628573	0.992346	0.322137	2.45255	2.95535	3.30148	3.0109	3.75948	MIMAT0015086	miRNA	Homo sapiens	chr22:48670176-48670192 (+)	17	GGGAUAUGAAGAAAAAU	---	---	miRBase
MIMAT0000510_st	hsa-miR-320a	-0.118419	0.697097	0.992346	5.43399	4.86137	4.77773	5.06937	4.80439	4.84407	MIMAT0000510	miRNA	Homo sapiens	chr8:22102488-22102509 (-)	22	AAAAGCUGGGUUGAGAGGGCGA	---	---	miRBase
MIMAT0005792_st	hsa-miR-320b	-0.403576	0.512784	0.992346	4.63226	4.86248	4.47007	4.99068	2.81692	4.94648	MIMAT0005792	miRNA	Homo sapiens	chr1:117214409-117214430 (+) /// chr1:224444751-224444772 (-)	22	AAAAGCUGGGUUGAGAGGGCAA	ENST00000281701 // sense // intron // 18 /// ENST00000340871 // sense // intron // 16 /// ENST00000361463 // sense // intron // 16 /// ENST00000391875 // sense // intron // 17 /// ENST00000469075 // sense // intron // 17 /// ENST00000469968 // sense // intron // 16 /// ENST00000482491 // sense // intron // 16 /// ENST00000489194 // sense // intron // 1 /// ENST00000496393 // sense // intron // 2 …	---	miRBase
MIMAT0005793_st	hsa-miR-320c	-0.153775	0.559083	0.992346	4.78647	4.55847	4.59931	4.60541	4.43836	4.43916	MIMAT0005793	miRNA	Homo sapiens	chr18:19263520-19263539 (+) /// chr18:21901680-21901699 (+)	20	AAAAGCUGGGUUGAGAGGGU	ENST00000289119 // antisense // intron // 4 /// ENST00000577891 // antisense // intron // 4 /// ENST00000578270 // antisense // intron // 3 /// ENST00000579875 // antisense // intron // 3 /// ENST00000580981 // antisense // intron // 3 /// ENST00000584464 // antisense // intron // 3 /// OTTHUMT00000444757 // antisense // intron // 4 /// OTTHUMT00000444758 // antisense // intron // 3 /// OTTHUMT00…	---	miRBase
MIMAT0006764_st	hsa-miR-320d	0.936364	0.0741773	0.992346	1.93486	1.668	1.15083	2.87356	1.60578	3.08342	MIMAT0006764	miRNA	Homo sapiens	chr13:41301964-41301982 (-) /// chrX:140008337-140008355 (-)	19	AAAAGCUGGGUUGAGAGGA	---	---	miRBase
MIMAT0015072_st	hsa-miR-320e	-0.0971054	0.778288	0.992346	0.42642	1.26014	0.417751	0.612418	0.371867	0.828711	MIMAT0015072	miRNA	Homo sapiens	chr19:47212551-47212568 (-)	18	AAAGCUGGGUUGAGAAGG	ENST00000291281 // sense // intron // 3 /// ENST00000433867 // sense // intron // 4 /// ENST00000595132 // sense // intron // 3 /// ENST00000595515 // sense // intron // 4 /// ENST00000597641 // sense // intron // 2 /// ENST00000598633 // sense // intron // 4 /// ENST00000600194 // sense // intron // 2 /// ENST00000601605 // sense // intron // 2 /// ENST00000601806 // sense // intron // 4 /// OTT…	---	miRBase
MIMAT0001630_st	hsa-miR-323b-5p	-0.326569	0.38341	0.992346	1.48278	0.636149	0.847853	0.996703	0.20537	0.784999	MIMAT0001630	miRNA	Homo sapiens	chr14:101522570-101522592 (+)	23	AGGUUGUCCGUGGUGAGUUCGCA	---	hsa-mir-134 // chr14:101521024-101521096 (+) /// hsa-mir-154 // chr14:101526092-101526175 (+) /// hsa-mir-369 // chr14:101531935-101532004 (+) /// hsa-mir-377 // chr14:101528387-101528455 (+) /// hsa-mir-382 // chr14:101520643-101520718 (+) /// hsa-mir-409 // chr14:101531637-101531715 (+) /// hsa-mir-412 // chr14:101531784-101531874 (+) /// hsa-mir-410 // chr14:101532249-101532328 (+) /// hsa-mir…	miRBase
MIMAT0000762_st	hsa-miR-324-3p	-0.801513	0.294896	0.992346	3.96893	3.25748	1.99677	3.4317	1.00865	2.3783	MIMAT0000762	miRNA	Homo sapiens	chr17:7126627-7126646 (-)	20	ACUGCCCCAGGUGCUGCUGG	ENST00000322910 // antisense // intron // 10 /// ENST00000350303 // antisense // intron // 10 /// ENST00000356839 // antisense // intron // 11 /// ENST00000542255 // antisense // intron // 1 /// ENST00000543245 // antisense // intron // 12 /// ENST00000578579 // antisense // intron // 1 /// ENST00000578824 // antisense // intron // 1 /// ENST00000579425 // antisense // intron // 1 /// ENST0000057…	---	miRBase
MIMAT0000761_st	hsa-miR-324-5p	0.322581	0.443241	0.992346	-0.0538811	0.901913	0.479211	0.884009	0.146606	1.26437	MIMAT0000761	miRNA	Homo sapiens	chr17:7126661-7126683 (-)	23	CGCAUCCCCUAGGGCAUUGGUGU	ENST00000322910 // antisense // intron // 10 /// ENST00000350303 // antisense // intron // 10 /// ENST00000356839 // antisense // intron // 11 /// ENST00000542255 // antisense // intron // 1 /// ENST00000543245 // antisense // intron // 12 /// ENST00000578579 // antisense // intron // 1 /// ENST00000578824 // antisense // intron // 1 /// ENST00000579425 // antisense // intron // 1 /// ENST0000057…	---	miRBase
MIMAT0026486_st	hsa-miR-328-5p	-0.107923	0.762902	0.992346	6.08729	6.79131	6.24102	6.00718	6.01313	6.77553	MIMAT0026486	miRNA	Homo sapiens	chr16:67236270-67236292 (-)	23	GGGGGGGCAGGAGGGGCUCAGGG	ENST00000360833 // antisense // intron // 12 /// ENST00000393997 // antisense // intron // 13 /// ENST00000477898 // antisense // intron // 12 /// OTTHUMT00000257667 // antisense // intron // 12 /// OTTHUMT00000257668 // antisense // intron // 12 /// OTTHUMT00000257669 // antisense // intron // 13	---	miRBase
MIMAT0000765_st	hsa-miR-335-5p	0.339437	0.583015	0.992346	-0.0370403	1.83932	2.30167	1.49962	2.02182	1.60082	MIMAT0000765	miRNA	Homo sapiens	chr7:130135967-130135989 (+)	23	UCAAGAGCAAUAACGAAAAAUGU	ENST00000223215 // sense // intron // 2 /// ENST00000341441 // sense // intron // 2 /// ENST00000378576 // sense // intron // 2 /// ENST00000393187 // sense // intron // 2 /// ENST00000399874 // sense // intron // 2 /// ENST00000416162 // sense // intron // 2 /// ENST00000421001 // sense // intron // 2 /// ENST00000427521 // sense // intron // 2 /// ENST00000433159 // sense // intron // 2 /// ENS…	---	miRBase
MIMAT0000754_st	hsa-miR-337-3p	0.209247	0.465305	0.992346	0.691804	0.463635	0.414057	0.637861	0.546093	1.01328	MIMAT0000754	miRNA	Homo sapiens	chr14:101340890-101340911 (+)	22	CUCCUAUAUGAUGCCUUUCUUC	---	hsa-mir-127 // chr14:101349316-101349412 (+) /// hsa-mir-337 // chr14:101340830-101340922 (+) /// hsa-mir-431 // chr14:101347344-101347457 (+) /// hsa-mir-433 // chr14:101348223-101348315 (+) /// hsa-mir-493 // chr14:101335397-101335485 (+) /// hsa-mir-432 // chr14:101350820-101350913 (+) /// hsa-mir-665 // chr14:101341370-101341441 (+)	miRBase
MIMAT0004701_st	hsa-miR-338-5p	-0.949253	0.205524	0.992346	4.24711	4.00368	4.18069	4.16757	1.46796	3.94819	MIMAT0004701	miRNA	Homo sapiens	chr17:79099723-79099744 (-)	22	AACAAUAUCCUGGUGCUGAGUG	ENST00000326724 // sense // intron // 7 /// ENST00000374792 // sense // intron // 7 /// ENST00000390137 // antisense // exon // 1 /// ENST00000417379 // sense // intron // 6 /// ENST00000572339 // sense // intron // 5 /// ENST00000573469 // sense // intron // 1 /// OTTHUMT00000256055 // sense // intron // 7 /// OTTHUMT00000256056 // sense // intron // 6 /// OTTHUMT00000439038 // sense // intron /…	hsa-mir-338 // chr17:79099683-79099749 (-) /// hsa-mir-657 // chr17:79099076-79099173 (-) /// hsa-mir-1250 // chr17:79106996-79107108 (-) /// hsa-mir-3065 // chr17:79099677-79099755 (+)	miRBase
MIMAT0000753_st	hsa-miR-342-3p	0.183056	0.62995	0.992346	0.355652	1.27049	1.42349	0.927182	1.47693	1.19468	MIMAT0000753	miRNA	Homo sapiens	chr14:100576052-100576074 (+)	23	UCUCACACAGAAAUCGCACCCGU	ENST00000392920 // sense // intron // 3 /// ENST00000402714 // sense // intron // 3 /// ENST00000544450 // sense // intron // 3 /// ENST00000553875 // sense // intron // 4 /// ENST00000554045 // sense // intron // 3 /// ENST00000555706 // sense // intron // 4 /// ENST00000557153 // sense // intron // 3 /// ENST00000557384 // sense // intron // 2 /// OTTHUMT00000413958 // sense // intron // 3 /// …	hsa-mir-342 // chr14:100575992-100576090 (+) /// hsa-mir-151b // chr14:100575756-100575851 (-)	miRBase
MIMAT0022698_st	hsa-miR-345-3p	0.522564	0.355759	0.992346	1.20294	0.746328	0.289769	1.96988	0.108723	1.72813	MIMAT0022698	miRNA	Homo sapiens	chr14:100774249-100774270 (+)	22	GCCCUGAACGAGGGGUCUGGAG	---	---	miRBase
MIMAT0000773_st	hsa-miR-346	0.541874	0.204089	0.992346	0.852915	1.29937	0.348379	1.96559	0.924185	1.23651	MIMAT0000773	miRNA	Homo sapiens	chr10:88024504-88024526 (-)	23	UGUCUGCCCGCAUGCCUGCCUCU	ENST00000327946 // sense // intron // 2 /// ENST00000464741 // sense // intron // 2 /// OTTHUMT00000049147 // sense // intron // 2 /// OTTHUMT00000049148 // sense // intron // 2	---	miRBase
MIMAT0004676_st	hsa-miR-34b-3p	0.145672	0.576312	0.992346	0.0522654	0.0522654	0.0561524	0.119462	0.354442	0.123796	MIMAT0004676	miRNA	Homo sapiens	chr11:111383712-111383733 (+)	22	CAAUCACUAACUCCACUGCCAU	---	hsa-mir-34b // chr11:111383663-111383746 (+) /// hsa-mir-34c // chr11:111384164-111384240 (+)	miRBase
MIMAT0000703_st	hsa-miR-361-5p	-0.480994	0.219723	0.992346	0.607094	1.51823	0.329641	0.338309	0.335361	0.338309	MIMAT0000703	miRNA	Homo sapiens	chrX:85158686-85158707 (-)	22	UUAUCAGAAUCUCCAGGGGUAC	ENST00000357749 // sense // intron // 9 /// ENST00000467744 // sense // intron // 2 /// ENST00000537751 // sense // intron // 6 /// OTTHUMT00000057396 // sense // intron // 9 /// OTTHUMT00000057399 // sense // intron // 2	---	miRBase
MIMAT0017987_st	hsa-miR-3610	0.260701	0.383239	0.992346	0.283023	0.701327	0.831959	0.667358	0.949855	0.981198	MIMAT0017987	miRNA	Homo sapiens	chr8:117886979-117886998 (-)	20	GAAUCGGAAAGGAGGCGCCG	ENST00000297338 // sense // 5UTR // 1 /// ENST00000521487 // antisense // exon // 1 /// OTTHUMT00000381184 // sense // 5UTR // 1 /// OTTHUMT00000381194 // antisense // exon // 1	---	miRBase
MIMAT0017991_st	hsa-miR-3613-3p	0.833022	0.311524	0.992346	5.97021	8.41448	9.2068	8.37026	8.92686	8.79344	MIMAT0017991	miRNA	Homo sapiens	chr13:50570562-50570585 (-)	24	ACAAAAAAAAAAGCCCAACCCUUC	ENST00000442421 // antisense // intron // 1 /// OTTHUMT00000044949 // antisense // intron // 1	---	miRBase
MIMAT0017990_st	hsa-miR-3613-5p	-2.295	0.190687	0.992346	8.02328	2.04032	1.24684	1.53134	1.47749	1.41661	MIMAT0017990	miRNA	Homo sapiens	chr13:50570601-50570622 (-)	22	UGUUGUACUUUUUUUUUUGUUC	ENST00000442421 // antisense // intron // 1 /// OTTHUMT00000044949 // antisense // intron // 1	---	miRBase
MIMAT0019219_st	hsa-miR-3619-3p	0.67177	0.137676	0.992346	1.72711	2.18012	0.782309	2.52594	2.15076	2.02815	MIMAT0019219	miRNA	Homo sapiens	chr22:46486970-46486991 (+)	22	GGGACCAUCCUGCCUGCUGUGG	ENST00000360737 // sense // intron // 1 /// ENST00000381051 // sense // intron // 1 /// ENST00000435439 // sense // intron // 1 /// ENST00000443490 // sense // intron // 1 /// OTTHUMT00000316781 // sense // intron // 1 /// OTTHUMT00000316782 // sense // intron // 1 /// OTTHUMT00000316783 // sense // intron // 1 /// OTTHUMT00000316787 // sense // intron // 1	---	miRBase
MIMAT0017999_st	hsa-miR-3619-5p	-0.570898	0.11398	0.992346	3.07682	3.78061	3.89535	3.10604	2.78491	3.14914	MIMAT0017999	miRNA	Homo sapiens	chr22:46486939-46486960 (+)	22	UCAGCAGGCAGGCUGGUGCAGC	ENST00000360737 // sense // intron // 1 /// ENST00000381051 // sense // intron // 1 /// ENST00000435439 // sense // intron // 1 /// ENST00000443490 // sense // intron // 1 /// OTTHUMT00000316781 // sense // intron // 1 /// OTTHUMT00000316782 // sense // intron // 1 /// OTTHUMT00000316783 // sense // intron // 1 /// OTTHUMT00000316787 // sense // intron // 1	---	miRBase
MIMAT0022967_st	hsa-miR-3620-5p	-0.245911	0.419131	0.992346	6.92466	7.44804	7.03901	6.88231	6.6596	7.13208	MIMAT0022967	miRNA	Homo sapiens	chr1:228284986-228285007 (+)	22	GUGGGCUGGGCUGGGCUGGGCC	ENST00000272102 // sense // intron // 2 /// ENST00000469235 // sense // intron // 2 /// ENST00000470558 // sense // intron // 2 /// ENST00000470670 // sense // exon // 2 /// ENST00000473949 // sense // intron // 3 /// ENST00000477451 // sense // intron // 2 /// ENST00000477821 // sense // exon // 2 /// ENST00000478336 // sense // intron // 2 /// ENST00000478424 // sense // intron // 2 /// ENST000…	---	miRBase
MIMAT0018002_st	hsa-miR-3621	-0.101489	0.819529	0.992346	2.94707	4.57926	3.99904	3.63415	3.75339	3.83337	MIMAT0018002	miRNA	Homo sapiens	chr9:140063688-140063707 (-)	20	CGCGGGUCGGGGUCUGCAGG	ENST00000371542 // sense // intron // 1 /// ENST00000568665 // sense // intron // 2 /// OTTHUMT00000055307 // sense // intron // 1 /// OTTHUMT00000431926 // sense // intron // 2	---	miRBase
MIMAT0018005_st	hsa-miR-3622b-5p	0.68978	0.100454	0.992346	0.769938	0.769938	0.15399	1.46251	0.63732	1.66337	MIMAT0018005	miRNA	Homo sapiens	chr8:27559243-27559262 (-)	20	AGGCAUGGGAGGUCAGGUGA	OTTHUMT00000423049 // antisense // exon // 1	hsa-mir-3622a // chr8:27559194-27559276 (+) /// hsa-mir-3622b // chr8:27559190-27559284 (-)	miRBase
MIMAT0018065_st	hsa-miR-3646	0.1932	0.556533	0.992346	0.235264	1.05883	0.636937	1.07908	0.790751	0.640803	MIMAT0018065	miRNA	Homo sapiens	chr20:43036817-43036838 (+)	22	AAAAUGAAAUGAGCCCAGCCCA	ENST00000316099 // sense // intron // 3 /// ENST00000316673 // sense // intron // 3 /// ENST00000372920 // sense // intron // 4 /// ENST00000415691 // sense // intron // 3 /// ENST00000443598 // sense // intron // 3 /// ENST00000457232 // sense // intron // 3 /// OTTHUMT00000079362 // sense // intron // 3 /// OTTHUMT00000079363 // sense // intron // 3 /// OTTHUMT00000079364 // sense // intron // …	---	miRBase
MIMAT0018068_st	hsa-miR-3648	-0.548546	0.46541	0.992346	4.30357	5.09577	6.80555	3.84395	5.65505	5.06025	MIMAT0018068	miRNA	Homo sapiens	chr21:9825859-9825879 (+)	21	AGCCGCGGGGAUCGCCGAGGG	---	hsa-mir-3648 // chr21:9825832-9826011 (+) /// hsa-mir-3687 // chr21:9826203-9826263 (+)	miRBase
MIMAT0018072_st	hsa-miR-3652	0.79973	0.167864	0.992346	0.63689	2.3067	0.953822	2.56429	1.37635	2.35597	MIMAT0018072	miRNA	Homo sapiens	chr12:104324203-104324220 (+)	18	CGGCUGGAGGUGUGAGGA	ENST00000299767 // sense // 3UTR // 1 /// ENST00000540297 // sense // 3UTR // 1 /// ENST00000548462 // sense // exon // 1 /// ENST00000548622 // sense // exon // 1 /// ENST00000549334 // sense // intron // 1 /// OTTHUMT00000407348 // sense // intron // 1 /// OTTHUMT00000407349 // sense // 3UTR // 1 /// OTTHUMT00000407350 // sense // exon // 1 /// OTTHUMT00000407351 // sense // 3UTR // 1 /// OTTHU…	---	miRBase
MIMAT0018075_st	hsa-miR-3655	-0.227525	0.56214	0.992346	0.763724	1.48987	0.539356	0.672874	0.265943	1.17155	MIMAT0018075	miRNA	Homo sapiens	chr5:140027429-140027449 (+)	21	GCUUGUCGCUGCGGUGUUGCU	ENST00000417647 // sense // 3UTR // 1 /// ENST00000503332 // sense // 3UTR // 1 /// ENST00000507593 // sense // 3UTR // 1 /// ENST00000508301 // sense // 3UTR // 1 /// ENST00000513256 // sense // intron // 1 /// OTTHUMT00000372897 // sense // 3UTR // 1 /// OTTHUMT00000372901 // sense // intron // 1 /// OTTHUMT00000372904 // sense // 3UTR // 1 /// OTTHUMT00000372905 // sense // 3UTR // 1 /// OTTHU…	---	miRBase
MIMAT0018076_st	hsa-miR-3656	0.0839236	0.841391	0.992346	6.95203	7.37012	6.08209	7.14548	6.43999	7.07054	MIMAT0018076	miRNA	Homo sapiens	chr11:118889702-118889718 (+)	17	GGCGGGUGCGGGGGUGG	ENST00000359005 // sense // 3UTR // 1 /// ENST00000434101 // sense // 3UTR // 1 /// ENST00000447216 // sense // exon // 1 /// ENST00000525079 // sense // 3UTR // 1 /// ENST00000525303 // sense // 3UTR // 1 /// ENST00000527680 // sense // exon // 1 /// ENST00000528230 // sense // 3UTR // 1 /// ENST00000531290 // sense // exon // 1 /// ENST00000533012 // sense // 3UTR // 1 /// ENST00000533058 // se…	---	miRBase
MIMAT0009199_st	hsa-miR-365a-5p	-0.581075	0.109168	0.992346	2.67646	2.24753	2.68905	2.39623	1.56433	1.90925	MIMAT0009199	miRNA	Homo sapiens	chr16:14403157-14403179 (+)	23	AGGGACUUUUGGGGGCAGAUGUG	ENST00000570945 // sense // intron // 1 /// ENST00000571639 // sense // intron // 1 /// OTTHUMT00000436878 // sense // intron // 1 /// OTTHUMT00000436879 // sense // intron // 1	hsa-mir-365a // chr16:14403142-14403228 (+) /// hsa-mir-193b // chr16:14397824-14397906 (+)	miRBase
MIMAT0022833_st	hsa-miR-365b-5p	0.0692881	0.924479	0.998769	1.38009	0.625323	3.4304	1.40468	2.52047	1.71852	MIMAT0022833	miRNA	Homo sapiens	chr17:29902458-29902479 (+)	22	AGGGACUUUCAGGGGCAGCUGU	ENST00000412403 // sense // 3UTR // 3 /// OTTHUMT00000256194 // sense // 3UTR // 3	hsa-mir-365b // chr17:29902430-29902540 (+) /// hsa-mir-4725 // chr17:29902288-29902377 (+)	miRBase
MIMAT0018085_st	hsa-miR-3663-3p	0.302285	0.277133	0.992346	6.323	6.23556	6.3132	6.81053	6.54606	6.42202	MIMAT0018085	miRNA	Homo sapiens	chr10:118927206-118927228 (-)	23	UGAGCACCACACAGGCCGGGCGC	ENST00000419373 // sense // intron // 1 /// OTTHUMT00000050558 // sense // intron // 1	---	miRBase
MIMAT0018084_st	hsa-miR-3663-5p	-0.579287	0.370592	0.992346	3.56239	3.8184	1.77238	2.95087	1.68061	2.78384	MIMAT0018084	miRNA	Homo sapiens	chr10:118927245-118927265 (-)	21	GCUGGUCUGCGUGGUGCUCGG	ENST00000419373 // sense // intron // 1 /// OTTHUMT00000050558 // sense // intron // 1	---	miRBase
MIMAT0018087_st	hsa-miR-3665	0.335037	0.218063	0.992346	7.57649	7.79084	7.60951	7.92365	8.03119	8.02711	MIMAT0018087	miRNA	Homo sapiens	chr13:78272210-78272227 (-)	18	AGCAGGUGCGGGGCGGCG	ENST00000422114 // antisense // intron // 1 /// ENST00000466548 // antisense // 3UTR // 1 /// OTTHUMT00000045346 // antisense // intron // 1 /// OTTHUMT00000355018 // antisense // 3UTR // 1	---	miRBase
MIMAT0018104_st	hsa-miR-3679-5p	0.273559	0.696791	0.992346	3.82533	4.05036	1.93521	4.11334	2.48116	4.03707	MIMAT0018104	miRNA	Homo sapiens	chr2:134884701-134884723 (+)	23	UGAGGAUAUGGCAGGGAAGGGGA	ENST00000409645 // sense // intron // 1 /// ENST00000468758 // sense // intron // 1 /// ENST00000481801 // sense // intron // 1 /// OTTHUMT00000254584 // sense // intron // 1 /// OTTHUMT00000332272 // sense // intron // 1 /// OTTHUMT00000332273 // sense // intron // 1	---	miRBase
MIMAT0018110_st	hsa-miR-3682-3p	-0.0149646	0.977267	0.998769	1.00154	1.48395	1.11719	2.16833	0.134062	1.2554	MIMAT0018110	miRNA	Homo sapiens	chr2:54076273-54076293 (-)	21	UGAUGAUACAGGUGGAGGUAG	ENST00000352846 // sense // intron // 1 /// ENST00000406625 // sense // intron // 1 /// ENST00000459916 // sense // intron // 1 /// ENST00000498475 // sense // intron // 1 /// OTTHUMT00000324080 // sense // intron // 1 /// OTTHUMT00000324161 // sense // intron // 1 /// OTTHUMT00000326159 // sense // intron // 1	---	miRBase
MIMAT0018118_st	hsa-miR-3689a-3p	-0.447309	0.415168	0.992346	0.839058	1.97839	0.747047	1.59882	-0.0604526	0.684192	MIMAT0018118	miRNA	Homo sapiens	chr9:137741340-137741361 (-)	22	CUGGGAGGUGUGAUAUCGUGGU	---	hsa-mir-3689a // chr9:137741333-137741410 (-) /// hsa-mir-3689b // chr9:137741971-137742118 (-) /// hsa-mir-3689c // chr9:137741144-137741215 (-) /// hsa-mir-3689d-1 // chr9:137741455-137741528 (-) /// hsa-mir-3689d-2 // chr9:137742123-137742202 (-) /// hsa-mir-3689e // chr9:137742416-137742487 (-) /// hsa-mir-3689f // chr9:137742588-137742653 (-)	miRBase
MIMAT0018117_st	hsa-miR-3689a-5p	0.337972	0.240769	0.992346	0.347314	0.227747	0.621847	0.907307	0.667955	0.635563	MIMAT0018117	miRNA	Homo sapiens	chr9:137741380-137741401 (-)	22	UGUGAUAUCAUGGUUCCUGGGA	---	hsa-mir-3689a // chr9:137741333-137741410 (-) /// hsa-mir-3689b // chr9:137741971-137742118 (-) /// hsa-mir-3689c // chr9:137741144-137741215 (-) /// hsa-mir-3689d-1 // chr9:137741455-137741528 (-) /// hsa-mir-3689d-2 // chr9:137742123-137742202 (-) /// hsa-mir-3689e // chr9:137742416-137742487 (-) /// hsa-mir-3689f // chr9:137742588-137742653 (-)	miRBase
MIMAT0018181_st	hsa-miR-3689b-3p	-0.130857	0.766418	0.992346	1.4743	1.05845	0.370107	1.27243	0.15109	1.08677	MIMAT0018181	miRNA	Homo sapiens	chr9:137742012-137742033 (-)	22	CUGGGAGGUGUGAUAUUGUGGU	---	hsa-mir-3689a // chr9:137741333-137741410 (-) /// hsa-mir-3689b // chr9:137741971-137742118 (-) /// hsa-mir-3689c // chr9:137741144-137741215 (-) /// hsa-mir-3689d-1 // chr9:137741455-137741528 (-) /// hsa-mir-3689d-2 // chr9:137742123-137742202 (-) /// hsa-mir-3689e // chr9:137742416-137742487 (-) /// hsa-mir-3689f // chr9:137742588-137742653 (-)	miRBase
MIMAT0018180_st	hsa-miR-3689b-5p	0.337972	0.240769	0.992346	0.347314	0.227747	0.621847	0.907307	0.667955	0.635563	MIMAT0018180	miRNA	Homo sapiens	chr9:137742052-137742073 (-)	22	UGUGAUAUCAUGGUUCCUGGGA	---	hsa-mir-3689a // chr9:137741333-137741410 (-) /// hsa-mir-3689b // chr9:137741971-137742118 (-) /// hsa-mir-3689c // chr9:137741144-137741215 (-) /// hsa-mir-3689d-1 // chr9:137741455-137741528 (-) /// hsa-mir-3689d-2 // chr9:137742123-137742202 (-) /// hsa-mir-3689e // chr9:137742416-137742487 (-) /// hsa-mir-3689f // chr9:137742588-137742653 (-)	miRBase
MIMAT0019007_st	hsa-miR-3689c	-0.130857	0.766418	0.992346	1.4743	1.05845	0.370107	1.27243	0.15109	1.08677	MIMAT0019007	miRNA	Homo sapiens	chr9:137741148-137741169 (-)	22	CUGGGAGGUGUGAUAUUGUGGU	---	hsa-mir-3689a // chr9:137741333-137741410 (-) /// hsa-mir-3689b // chr9:137741971-137742118 (-) /// hsa-mir-3689c // chr9:137741144-137741215 (-) /// hsa-mir-3689d-1 // chr9:137741455-137741528 (-) /// hsa-mir-3689d-2 // chr9:137742123-137742202 (-) /// hsa-mir-3689e // chr9:137742416-137742487 (-) /// hsa-mir-3689f // chr9:137742588-137742653 (-)	miRBase
MIMAT0019009_st	hsa-miR-3689e	0.337972	0.240769	0.992346	0.347314	0.227747	0.621847	0.907307	0.667955	0.635563	MIMAT0019009	miRNA	Homo sapiens	chr9:137742460-137742481 (-)	22	UGUGAUAUCAUGGUUCCUGGGA	---	hsa-mir-3689a // chr9:137741333-137741410 (-) /// hsa-mir-3689b // chr9:137741971-137742118 (-) /// hsa-mir-3689c // chr9:137741144-137741215 (-) /// hsa-mir-3689d-1 // chr9:137741455-137741528 (-) /// hsa-mir-3689d-2 // chr9:137742123-137742202 (-) /// hsa-mir-3689e // chr9:137742416-137742487 (-) /// hsa-mir-3689f // chr9:137742588-137742653 (-)	miRBase
MIMAT0019010_st	hsa-miR-3689f	-1.22427	0.0529168	0.992346	1.25863	3.01468	1.68156	0.834626	0.0944136	1.35302	MIMAT0019010	miRNA	Homo sapiens	chr9:137742629-137742650 (-)	22	UGUGAUAUCGUGCUUCCUGGGA	---	hsa-mir-3689a // chr9:137741333-137741410 (-) /// hsa-mir-3689b // chr9:137741971-137742118 (-) /// hsa-mir-3689c // chr9:137741144-137741215 (-) /// hsa-mir-3689d-1 // chr9:137741455-137741528 (-) /// hsa-mir-3689d-2 // chr9:137742123-137742202 (-) /// hsa-mir-3689e // chr9:137742416-137742487 (-) /// hsa-mir-3689f // chr9:137742588-137742653 (-)	miRBase
MIMAT0004687_st	hsa-miR-371a-5p	0.542974	0.153245	0.992346	0.3565	0.88694	0.901913	0.88694	1.09916	1.78818	MIMAT0004687	miRNA	Homo sapiens	chr19:54290934-54290953 (+)	20	ACUCAAACUGUGGGGGCACU	ENST00000595160 // antisense // exon // 2 /// OTTHUMT00000465677 // antisense // exon // 2	hsa-mir-371a // chr19:54290929-54290995 (+) /// hsa-mir-372 // chr19:54291144-54291210 (+) /// hsa-mir-373 // chr19:54291959-54292027 (+) /// hsa-mir-371b // chr19:54290931-54290996 (-)	miRBase
MIMAT0019892_st	hsa-miR-371b-5p	0.507517	0.271255	0.992346	0.397283	1.45769	0.322348	1.47344	0.626776	1.59966	MIMAT0019892	miRNA	Homo sapiens	chr19:54290969-54290990 (-)	22	ACUCAAAAGAUGGCGGCACUUU	ENST00000362161 // antisense // exon // 1 /// ENST00000595160 // sense // exon // 2 /// OTTHUMT00000465677 // sense // exon // 2	hsa-mir-371a // chr19:54290929-54290995 (+) /// hsa-mir-372 // chr19:54291144-54291210 (+) /// hsa-mir-373 // chr19:54291959-54292027 (+) /// hsa-mir-371b // chr19:54290931-54290996 (-)	miRBase
MIMAT0022923_st	hsa-miR-376b-5p	0.28747	0.353408	0.992346	0.548622	0.272943	0.167981	0.315275	0.952092	0.584589	MIMAT0022923	miRNA	Homo sapiens	chr14:101506796-101506817 (+)	22	CGUGGAUAUUCCUUCUAUGUUU	---	hsa-mir-376c // chr14:101506027-101506092 (+) /// hsa-mir-376a-1 // chr14:101507119-101507186 (+) /// hsa-mir-381 // chr14:101512257-101512331 (+) /// hsa-mir-376b // chr14:101506773-101506872 (+) /// hsa-mir-495 // chr14:101500092-101500173 (+) /// hsa-mir-539 // chr14:101513658-101513735 (+) /// hsa-mir-544a // chr14:101514995-101515085 (+) /// hsa-mir-376a-2 // chr14:101506406-101506485 (+) //…	miRBase
MIMAT0000730_st	hsa-miR-377-3p	0.318292	0.388844	0.992346	0.22362	0.224911	-0.0287075	-0.09172	0.424477	1.04194	MIMAT0000730	miRNA	Homo sapiens	chr14:101528431-101528452 (+)	22	AUCACACAAAGGCAACUUUUGU	ENST00000362145 // sense // exon // 1	hsa-mir-134 // chr14:101521024-101521096 (+) /// hsa-mir-154 // chr14:101526092-101526175 (+) /// hsa-mir-369 // chr14:101531935-101532004 (+) /// hsa-mir-377 // chr14:101528387-101528455 (+) /// hsa-mir-382 // chr14:101520643-101520718 (+) /// hsa-mir-409 // chr14:101531637-101531715 (+) /// hsa-mir-412 // chr14:101531784-101531874 (+) /// hsa-mir-410 // chr14:101532249-101532328 (+) /// hsa-mir…	miRBase
MIMAT0018984_st	hsa-miR-378h	0.552015	0.317783	0.992346	2.57155	3.52342	4.31569	3.32462	4.50071	4.24137	MIMAT0018984	miRNA	Homo sapiens	chr5:154209026-154209046 (+)	21	ACUGGACUUGGUGUCAGAUGG	ENST00000326080 // antisense // intron // 5 /// ENST00000423554 // antisense // intron // 5 /// ENST00000517938 // antisense // intron // 4 /// ENST00000518651 // antisense // intron // 4 /// ENST00000519258 // antisense // intron // 1 /// ENST00000519501 // antisense // intron // 5 /// ENST00000520581 // antisense // intron // 3 /// ENST00000520968 // antisense // intron // 5 /// ENST00000521518…	---	miRBase
MIMAT0000737_st	hsa-miR-382-5p	0.137423	0.660145	0.992346	0.517578	0.458907	0.28116	0.289948	0.367139	1.01283	MIMAT0000737	miRNA	Homo sapiens	chr14:101520653-101520674 (+)	22	GAAGUUGUUCGUGGUGGAUUCG	ENST00000385009 // antisense // exon // 1	hsa-mir-134 // chr14:101521024-101521096 (+) /// hsa-mir-154 // chr14:101526092-101526175 (+) /// hsa-mir-377 // chr14:101528387-101528455 (+) /// hsa-mir-381 // chr14:101512257-101512331 (+) /// hsa-mir-382 // chr14:101520643-101520718 (+) /// hsa-mir-485 // chr14:101521756-101521828 (+) /// hsa-mir-487a // chr14:101518783-101518862 (+) /// hsa-mir-496 // chr14:101526910-101527011 (+) /// hsa-mi…	miRBase
MIMAT0018179_st	hsa-miR-3907	-0.016655	0.966795	0.998769	5.09963	5.52556	4.74692	5.52679	4.43005	5.3653	MIMAT0018179	miRNA	Homo sapiens	chr7:151130612-151130633 (-)	22	AGGUGCUCCAGGCUGGCUCACA	ENST00000337323 // sense // intron // 3 /// ENST00000462809 // sense // intron // 2 /// ENST00000465549 // antisense // intron // 1 /// ENST00000476631 // sense // intron // 3 /// ENST00000478106 // sense // intron // 1 /// ENST00000491928 // sense // intron // 2 /// OTTHUMT00000348552 // antisense // intron // 1 /// OTTHUMT00000348553 // sense // intron // 3 /// OTTHUMT00000348554 // sense // in…	---	miRBase
MIMAT0018184_st	hsa-miR-3910	0.448339	0.415483	0.992346	0.340719	0.86334	1.62031	0.901913	2.3938	0.873677	MIMAT0018184	miRNA	Homo sapiens	chr9:94398595-94398614 (+) /// chr9:94398559-94398578 (-)	20	AAAGGCAUAAAACCAAGACA	ENST00000375715 // antisense // intron // 12 /// OTTHUMT00000053041 // antisense // intron // 12 /// ENST00000375715 // sense // intron // 12 /// ENST00000580936 // antisense // exon // 1 /// OTTHUMT00000053041 // sense // intron // 12	hsa-mir-3910-1 // chr9:94398533-94398643 (+) /// hsa-mir-3910-2 // chr9:94398546-94398627 (-) /// hsa-mir-3910-1 // chr9:94398533-94398643 (+) /// hsa-mir-3910-2 // chr9:94398546-94398627 (-)	miRBase
MIMAT0018185_st	hsa-miR-3911	0.371398	0.284826	0.992346	0.842169	0.487077	0.162646	0.901913	0.48842	1.21575	MIMAT0018185	miRNA	Homo sapiens	chr9:130453042-130453063 (-)	22	UGUGUGGAUCCUGGAGGAGGCA	ENST00000373299 // antisense // 3UTR // 19 /// ENST00000373302 // antisense // exon // 20 /// ENST00000481942 // antisense // intron // 6 /// OTTHUMT00000054228 // antisense // exon // 20 /// OTTHUMT00000054229 // antisense // 3UTR // 19 /// OTTHUMT00000054231 // antisense // intron // 6	---	miRBase
MIMAT0018186_st	hsa-miR-3912-3p	0.564138	0.0916647	0.992346	-0.243159	0.349697	0.345363	0.653206	0.901255	0.589855	MIMAT0018186	miRNA	Homo sapiens	chr5:170813682-170813702 (-)	21	UAACGCAUAAUAUGGACAUGU	---	---	miRBase
MIMAT0018191_st	hsa-miR-3917	0.364671	0.531053	0.992346	1.91537	0.36807	0.553829	1.78556	0.36807	1.77765	MIMAT0018191	miRNA	Homo sapiens	chr1:26232875-26232894 (-)	20	GCUCGGACUGAGCAGGUGGG	ENST00000357865 // sense // intron // 1 /// ENST00000426559 // sense // intron // 1 /// ENST00000455785 // sense // intron // 1 /// ENST00000465604 // sense // intron // 1 /// OTTHUMT00000019355 // sense // intron // 1 /// OTTHUMT00000019356 // sense // intron // 1 /// OTTHUMT00000019357 // sense // intron // 1 /// OTTHUMT00000385768 // sense // intron // 1	---	miRBase
MIMAT0018196_st	hsa-miR-3921	0.194495	0.769382	0.992346	1.72717	2.526	3.12956	3.18779	3.49866	1.27978	MIMAT0018196	miRNA	Homo sapiens	chr3:99683169-99683191 (-)	23	UCUCUGAGUACCAUAUGCCUUGU	ENST00000331335 // sense // intron // 1 /// ENST00000354552 // sense // intron // 1 /// ENST00000398326 // sense // intron // 1 /// ENST00000421999 // antisense // intron // 1 /// ENST00000463526 // antisense // intron // 1 /// ENST00000491299 // antisense // intron // 1 /// ENST00000496116 // antisense // intron // 1 /// OTTHUMT00000353060 // antisense // intron // 1 /// OTTHUMT00000353061 // an…	---	miRBase
MIMAT0018202_st	hsa-miR-3927-3p	0.369818	0.228823	0.992346	0.31913	-0.0952837	0.342994	0.342994	0.530956	0.802345	MIMAT0018202	miRNA	Homo sapiens	chr9:112273760-112273781 (-)	22	CAGGUAGAUAUUUGAUAGGCAU	---	---	miRBase
MIMAT0019229_st	hsa-miR-3940-5p	0.0399189	0.88843	0.998769	5.91301	6.15813	5.90518	6.04978	5.75542	6.29087	MIMAT0019229	miRNA	Homo sapiens	chr19:6416481-6416500 (-)	20	GUGGGUUGGGGCGGGCUCUG	ENST00000398148 // sense // intron // 14 /// ENST00000595223 // sense // intron // 2 /// OTTHUMT00000453305 // sense // intron // 14 /// OTTHUMT00000453308 // sense // intron // 2	---	miRBase
MIMAT0018358_st	hsa-miR-3942-5p	-0.575504	0.0845365	0.992346	1.14341	0.901913	1.26871	0.380531	0.311762	0.895228	MIMAT0018358	miRNA	Homo sapiens	chr15:35664522-35664543 (-)	22	AAGCAAUACUGUUACCUGAAAU	ENST00000256538 // sense // intron // 8 /// ENST00000558266 // sense // intron // 5 /// ENST00000558973 // sense // intron // 3 /// ENST00000560386 // sense // intron // 3 /// OTTHUMT00000251973 // sense // intron // 8 /// OTTHUMT00000417824 // sense // intron // 3 /// OTTHUMT00000418012 // sense // intron // 3 /// OTTHUMT00000418013 // sense // intron // 5	---	miRBase
MIMAT0018360_st	hsa-miR-3944-3p	-0.526065	0.152469	0.992346	4.26384	4.58598	3.76634	4.03707	3.40111	3.59979	MIMAT0018360	miRNA	Homo sapiens	chr10:135185083-135185105 (-)	23	UUCGGGCUGGCCUGCUGCUCCGG	ENST00000368547 // sense // intron // 1 /// OTTHUMT00000051156 // sense // intron // 1	---	miRBase
MIMAT0018361_st	hsa-miR-3945	-0.129386	0.809687	0.992346	0.102609	0.57617	1.88033	0.163536	1.28512	0.722292	MIMAT0018361	miRNA	Homo sapiens	chr4:185772220-185772242 (-)	23	AGGGCAUAGGAGAGGGUUGAUAU	ENST00000510284 // sense // intron // 1 /// ENST00000511703 // sense // intron // 1 /// OTTHUMT00000361376 // sense // intron // 1 /// OTTHUMT00000361377 // sense // intron // 1	---	miRBase
MIMAT0019337_st	hsa-miR-3960	0.110013	0.670177	0.992346	8.54611	8.58588	8.44834	8.53214	8.64715	8.73108	MIMAT0019337	miRNA	Homo sapiens	chr9:130548158-130548177 (+)	20	GGCGGCGGCGGAGGCGGGGG	ENST00000373265 // sense // 3UTR // 1 /// ENST00000421939 // sense // 3UTR // 1 /// OTTHUMT00000054239 // sense // 3UTR // 1	hsa-mir-2861 // chr9:130548197-130548286 (+) /// hsa-mir-3960 // chr9:130548112-130548202 (+)	miRBase
MIMAT0001639_st	hsa-miR-409-3p	-0.304138	0.404849	0.992346	-0.215925	0.526292	0.871312	0.191752	0.15707	-0.0795565	MIMAT0001639	miRNA	Homo sapiens	chr14:101531683-101531704 (+)	22	GAAUGUUGCUCGGUGAACCCCU	---	hsa-mir-154 // chr14:101526092-101526175 (+) /// hsa-mir-369 // chr14:101531935-101532004 (+) /// hsa-mir-377 // chr14:101528387-101528455 (+) /// hsa-mir-409 // chr14:101531637-101531715 (+) /// hsa-mir-412 // chr14:101531784-101531874 (+) /// hsa-mir-410 // chr14:101532249-101532328 (+) /// hsa-mir-485 // chr14:101521756-101521828 (+) /// hsa-mir-496 // chr14:101526910-101527011 (+) /// hsa-mir…	miRBase
MIMAT0003339_st	hsa-miR-421	0.402555	0.218119	0.992346	0.0234935	-0.00832689	0.0637957	0.901913	0.206711	0.178004	MIMAT0003339	miRNA	Homo sapiens	chrX:73438227-73438249 (-)	23	AUCAACAGACAUUAAUUGGGCGC	ENST00000602420 // sense // intron // 4 /// ENST00000602812 // sense // intron // 5 /// ENST00000603037 // sense // intron // 1 /// ENST00000603672 // sense // intron // 5 /// OTTHUMT00000467491 // sense // intron // 5 /// OTTHUMT00000467492 // sense // intron // 4 /// OTTHUMT00000468297 // sense // intron // 5 /// OTTHUMT00000468301 // sense // intron // 1	hsa-mir-421 // chrX:73438212-73438296 (-) /// hsa-mir-374b // chrX:73438382-73438453 (-) /// hsa-mir-374c // chrX:73438384-73438453 (+)	miRBase
MIMAT0004748_st	hsa-miR-423-5p	-0.159038	0.711203	0.992346	2.0342	3.36591	2.65483	2.3471	3.00506	2.22566	MIMAT0004748	miRNA	Homo sapiens	chr17:28444113-28444135 (+)	23	UGAGGGGCAGAGAGCGAGACUUU	ENST00000247026 // sense // intron // 1 /// ENST00000394826 // sense // intron // 1 /// ENST00000467446 // sense // exon // 1 /// ENST00000475652 // sense // intron // 1 /// ENST00000479218 // sense // intron // 1 /// ENST00000540900 // sense // intron // 2 /// ENST00000577289 // sense // intron // 1 /// ENST00000582938 // antisense // intron // 1 /// ENST00000583301 // sense // intron // 1 /// E…	hsa-mir-423 // chr17:28444097-28444190 (+) /// hsa-mir-3184 // chr17:28444104-28444178 (-)	miRBase
MIMAT0016882_st	hsa-miR-4253	-0.208961	0.5956	0.992346	1.72359	2.53237	2.23089	2.16777	1.33728	2.35492	MIMAT0016882	miRNA	Homo sapiens	chr1:23189662-23189679 (-)	18	AGGGCAUGUCCAGGGGGU	ENST00000374627 // antisense // 3UTR // 4 /// ENST00000374630 // antisense // 3UTR // 4 /// ENST00000374632 // antisense // 3UTR // 4 /// ENST00000400191 // antisense // 3UTR // 4 /// ENST00000465676 // antisense // exon // 2 /// ENST00000544305 // antisense // 3UTR // 4 /// OTTHUMT00000008059 // antisense // 3UTR // 4 /// OTTHUMT00000008060 // antisense // 3UTR // 4 /// OTTHUMT00000008061 // ant…	---	miRBase
MIMAT0016879_st	hsa-miR-4258	-0.0979881	0.821071	0.992346	0.573415	1.03961	1.60519	1.67986	0.670981	0.573415	MIMAT0016879	miRNA	Homo sapiens	chr1:154948179-154948195 (+)	17	CCCCGCCACCGCCUUGG	ENST00000308987 // sense // intron // 1 /// ENST00000368436 // sense // intron // 1 /// ENST00000368439 // sense // intron // 1 /// ENST00000473344 // sense // intron // 1 /// ENST00000474215 // sense // intron // 1 /// ENST00000477676 // sense // intron // 1 /// OTTHUMT00000091078 // sense // intron // 1 /// OTTHUMT00000091079 // sense // intron // 1 /// OTTHUMT00000091080 // sense // intron // …	---	miRBase
MIMAT0016881_st	hsa-miR-4260	0.174717	0.554619	0.992346	0.3484	0.903557	0.721154	0.981463	0.894889	0.62091	MIMAT0016881	miRNA	Homo sapiens	chr1:209796827-209796845 (-)	19	CUUGGGGCAUGGAGUCCCA	ENST00000356082 // sense // intron // 16 /// ENST00000367030 // sense // intron // 16 /// ENST00000391911 // sense // intron // 15 /// OTTHUMT00000088525 // sense // intron // 16 /// OTTHUMT00000088726 // sense // intron // 16	---	miRBase
MIMAT0016900_st	hsa-miR-4270	0.441587	0.428008	0.992346	5.21659	5.66394	4.0636	6.04636	4.62492	5.5976	MIMAT0016900	miRNA	Homo sapiens	chr3:15537786-15537805 (-)	20	UCAGGGAGUCAGGGGAGGGC	ENST00000383781 // sense // intron // 1 /// ENST00000383785 // sense // intron // 1 /// ENST00000383786 // sense // intron // 1 /// ENST00000383787 // sense // intron // 1 /// ENST00000383788 // sense // intron // 1 /// ENST00000435459 // sense // intron // 1 /// ENST00000603808 // sense // intron // 1 /// ENST00000605797 // sense // intron // 1 /// OTTHUMT00000343575 // sense // intron // 1 /// …	---	miRBase
MIMAT0016907_st	hsa-miR-4281	0.153272	0.640419	0.992346	7.62213	7.93993	7.06926	7.5664	7.63652	7.88822	MIMAT0016907	miRNA	Homo sapiens	chr5:176056450-176056467 (-)	18	GGGUCCCGGGGAGGGGGG	ENST00000310112 // sense // intron // 3 /// ENST00000393693 // sense // intron // 2 /// ENST00000506696 // sense // intron // 2 /// ENST00000508006 // sense // intron // 1 /// ENST00000510387 // sense // intron // 2 /// OTTHUMT00000253152 // sense // intron // 3 /// OTTHUMT00000372169 // sense // intron // 2 /// OTTHUMT00000372170 // sense // intron // 2 /// OTTHUMT00000372171 // sense // intron …	---	miRBase
MIMAT0016914_st	hsa-miR-4283	0.0903613	0.777859	0.992346	-0.107304	0.557841	0.508704	0.425788	0.656386	0.148151	MIMAT0016914	miRNA	Homo sapiens	chr7:57023545-57023561 (-) /// chr7:63081478-63081494 (+)	17	UGGGGCUCAGCGAGUUU	---	---	miRBase
MIMAT0016917_st	hsa-miR-4287	0.614106	0.0621098	0.992346	-0.0536518	-0.0460347	0.204215	0.633525	0.36446	0.948859	MIMAT0016917	miRNA	Homo sapiens	chr8:27743605-27743623 (-)	19	UCUCCCUUGAGGGCACUUU	ENST00000354914 // sense // intron // 7 /// ENST00000380385 // sense // intron // 6 /// OTTHUMT00000255223 // sense // intron // 7 /// OTTHUMT00000376443 // sense // intron // 6	---	miRBase
MIMAT0016919_st	hsa-miR-4292	0.206447	0.632168	0.992346	0.925964	1.28652	1.69928	1.72479	0.742055	2.06425	MIMAT0016919	miRNA	Homo sapiens	chr9:139725448-139725465 (+)	18	CCCCUGGGCCGGCCUUGG	ENST00000311502 // sense // intron // 5 /// ENST00000357466 // sense // intron // 5 /// ENST00000371663 // sense // intron // 5 /// ENST00000371671 // sense // intron // 5 /// ENST00000371675 // sense // intron // 5 /// ENST00000425121 // sense // intron // 3 /// ENST00000432842 // sense // intron // 5 /// ENST00000436380 // sense // intron // 4 /// ENST00000461992 // sense // intron // 2 /// ENS…	---	miRBase
MIMAT0016845_st	hsa-miR-4296	0.842267	0.0804121	0.992346	-0.103576	0.71422	0.473213	0.481881	1.81935	1.30943	MIMAT0016845	miRNA	Homo sapiens	chr10:126721413-126721429 (-)	17	AUGUGGGCUCAGGCUCA	ENST00000337195 // sense // intron // 3 /// ENST00000411419 // sense // intron // 3 /// ENST00000460976 // sense // intron // 2 /// ENST00000494626 // sense // intron // 3 /// ENST00000531469 // sense // intron // 3 /// OTTHUMT00000050900 // sense // intron // 3 /// OTTHUMT00000050901 // sense // intron // 3 /// OTTHUMT00000050902 // sense // intron // 3 /// OTTHUMT00000050903 // sense // intron …	---	miRBase
MIMAT0016852_st	hsa-miR-4298	0.136598	0.722483	0.992346	3.8837	3.95328	3.20916	4.11883	3.22528	4.11182	MIMAT0016852	miRNA	Homo sapiens	chr11:1880735-1880756 (-)	22	CUGGGACAGGAGGAGGAGGCAG	ENST00000311604 // antisense // intron // 1 /// OTTHUMT00000034045 // antisense // intron // 1	---	miRBase
MIMAT0016851_st	hsa-miR-4299	-0.240193	0.404916	0.992346	0.552144	0.374754	0.792233	0.283359	0.552144	0.16305	MIMAT0016851	miRNA	Homo sapiens	chr11:11678208-11678225 (-)	18	GCUGGUGACAUGAGAGGC	---	---	miRBase
MIMAT0016868_st	hsa-miR-4314	0.134456	0.636543	0.992346	0.517998	0.0916705	0.0828832	0.205106	0.371867	0.518946	MIMAT0016868	miRNA	Homo sapiens	chr17:7991384-7991401 (+)	18	CUCUGGGAAAUGGGACAG	---	---	miRBase
MIMAT0002814_st	hsa-miR-432-5p	-0.102091	0.787374	0.992346	0.103082	0.810882	0.0557112	0.639342	-0.306956	0.331018	MIMAT0002814	miRNA	Homo sapiens	chr14:101350833-101350855 (+)	23	UCUUGGAGUAGGUCAUUGGGUGG	ENST00000534062 // antisense // exon // 1 /// OTTHUMT00000395127 // antisense // exon // 1	hsa-mir-127 // chr14:101349316-101349412 (+) /// hsa-mir-136 // chr14:101351039-101351120 (+) /// hsa-mir-337 // chr14:101340830-101340922 (+) /// hsa-mir-431 // chr14:101347344-101347457 (+) /// hsa-mir-433 // chr14:101348223-101348315 (+) /// hsa-mir-432 // chr14:101350820-101350913 (+) /// hsa-mir-665 // chr14:101341370-101341441 (+)	miRBase
MIMAT0016873_st	hsa-miR-4322	-0.237032	0.682838	0.992346	1.80414	2.107	2.52259	2.81808	0.650047	2.2545	MIMAT0016873	miRNA	Homo sapiens	chr19:10341131-10341151 (+)	21	CUGUGGGCUCAGCGCGUGGGG	ENST00000588952 // antisense // intron // 1 /// ENST00000590320 // antisense // intron // 1 /// ENST00000592342 // antisense // intron // 1 /// OTTHUMT00000451185 // antisense // intron // 1 /// OTTHUMT00000451187 // antisense // intron // 1 /// OTTHUMT00000451194 // antisense // intron // 1	---	miRBase
MIMAT0016889_st	hsa-miR-4327	0.402823	0.190938	0.992346	0.371867	0.666231	0.562804	1.22136	0.637841	0.950166	MIMAT0016889	miRNA	Homo sapiens	chr21:31747668-31747686 (-)	19	GGCUUGCAUGGGGGACUGG	---	---	miRBase
MIMAT0016924_st	hsa-miR-4330	1.12706	0.103902	0.992346	0.797127	1.63306	1.91514	1.27953	3.5734	2.87356	MIMAT0016924	miRNA	Homo sapiens	chrX:150336770-150336788 (+)	19	CCUCAGAUCAGAGCCUUGC	---	---	miRBase
MIMAT0018929_st	hsa-miR-4417	-0.099263	0.80824	0.992346	1.58338	1.71288	0.819797	1.8296	0.728029	1.26064	MIMAT0018929	miRNA	Homo sapiens	chr1:5624142-5624159 (+)	18	GGUGGGCUUCCCGGAGGG	---	---	miRBase
MIMAT0018931_st	hsa-miR-4419a	0.36824	0.187297	0.992346	0.104983	0.39794	0.241553	0.559866	0.568677	0.720653	MIMAT0018931	miRNA	Homo sapiens	chr1:23384373-23384389 (-)	17	UGAGGGAGGAGACUGCA	ENST00000356634 // antisense // intron // 7 /// ENST00000400181 // antisense // intron // 8 /// ENST00000427154 // sense // intron // 1 /// ENST00000542151 // antisense // intron // 8 /// OTTHUMT00000008880 // antisense // intron // 7 /// OTTHUMT00000008881 // antisense // intron // 8 /// OTTHUMT00000008884 // sense // intron // 1	---	miRBase
MIMAT0018936_st	hsa-miR-4423-3p	0.556509	0.214021	0.992346	0.124794	1.49146	1.01236	1.05975	1.74885	1.48955	MIMAT0018936	miRNA	Homo sapiens	chr1:85599525-85599545 (+)	21	AUAGGCACCAAAAAGCAACAA	---	---	miRBase
MIMAT0018943_st	hsa-miR-4428	0.396938	0.148547	0.992346	0.720686	0.810164	0.801495	1.20883	1.07895	1.23538	MIMAT0018943	miRNA	Homo sapiens	chr1:237634464-237634485 (+)	22	CAAGGAGACGGGAACAUGGAGC	ENST00000360064 // sense // intron // 18 /// ENST00000366574 // sense // intron // 17 /// ENST00000542537 // sense // intron // 16 /// OTTHUMT00000095402 // sense // intron // 17	---	miRBase
MIMAT0018944_st	hsa-miR-4429	-0.00220544	0.994289	0.998769	3.12471	3.52534	3.35874	3.52534	2.92603	3.55081	MIMAT0018944	miRNA	Homo sapiens	chr2:11680778-11680797 (-)	20	AAAAGCUGGGCUGAGAGGCG	ENST00000263834 // antisense // intron // 1 /// ENST00000381486 // antisense // intron // 1 /// OTTHUMT00000280490 // antisense // intron // 1 /// OTTHUMT00000280491 // antisense // intron // 1	---	miRBase
MIMAT0018945_st	hsa-miR-4430	0.0533762	0.90297	0.998769	3.93817	4.20274	2.77526	3.52168	3.51864	4.03598	MIMAT0018945	miRNA	Homo sapiens	chr2:33643586-33643603 (+)	18	AGGCUGGAGUGAGCGGAG	---	---	miRBase
MIMAT0018949_st	hsa-miR-4433-3p	-0.0029771	0.996453	0.998769	5.12726	5.42896	3.80068	5.50734	3.49752	5.34312	MIMAT0018949	miRNA	Homo sapiens	chr2:64567943-64567963 (+)	21	ACAGGAGUGGGGGUGGGACAU	ENST00000424119 // antisense // intron // 1 /// OTTHUMT00000327291 // antisense // intron // 1	hsa-mir-4433 // chr2:64567893-64567973 (+) /// hsa-mir-4433b // chr2:64567881-64567982 (-)	miRBase
MIMAT0030414_st	hsa-miR-4433b-3p	0.00387237	0.992166	0.998769	5.86141	6.47803	5.36224	6.22282	5.44393	6.04654	MIMAT0030414	miRNA	Homo sapiens	chr2:64567903-64567923 (-)	21	CAGGAGUGGGGGGUGGGACGU	ENST00000424119 // sense // intron // 1 /// OTTHUMT00000327291 // sense // intron // 1	hsa-mir-4433 // chr2:64567893-64567973 (+) /// hsa-mir-4433b // chr2:64567881-64567982 (-)	miRBase
MIMAT0030413_st	hsa-miR-4433b-5p	-0.0862081	0.770344	0.992346	1.06799	0.783828	0.990507	1.21575	0.600801	0.767148	MIMAT0030413	miRNA	Homo sapiens	chr2:64567943-64567963 (-)	21	AUGUCCCACCCCCACUCCUGU	ENST00000424119 // sense // intron // 1 /// OTTHUMT00000327291 // sense // intron // 1	hsa-mir-4433 // chr2:64567893-64567973 (+) /// hsa-mir-4433b // chr2:64567881-64567982 (-)	miRBase
MIMAT0018952_st	hsa-miR-4436a	0.128964	0.702709	0.992346	0.0777068	0.855958	0.901913	0.901913	0.502212	0.818344	MIMAT0018952	miRNA	Homo sapiens	chr2:89111939-89111959 (+)	21	GCAGGACAGGCAGAAGUGGAU	ENST00000452230 // antisense // intron // 2 /// OTTHUMT00000323493 // antisense // intron // 2	---	miRBase
MIMAT0019940_st	hsa-miR-4436b-5p	0.568018	0.302914	0.992346	3.24346	4.40168	2.3094	4.08027	3.85625	3.72207	MIMAT0019940	miRNA	Homo sapiens	chr2:110844067-110844088 (-) /// chr2:111042442-111042463 (+)	22	GUCCACUUCUGCCUGCCCUGCC	ENST00000272462 // sense // intron // 3 /// ENST00000424988 // sense // intron // 4 /// ENST00000427178 // sense // intron // 1 /// OTTHUMT00000253921 // sense // intron // 3 /// OTTHUMT00000338105 // sense // intron // 1 /// OTTHUMT00000338106 // sense // intron // 4 /// ENST00000568189 // sense // intron // 3 /// OTTHUMT00000431537 // sense // intron // 3	---	miRBase
MIMAT0018958_st	hsa-miR-4440	-0.41605	0.208012	0.992346	8.83447	9.02729	8.54612	8.5843	7.98819	8.58723	MIMAT0018958	miRNA	Homo sapiens	chr2:239990525-239990546 (-)	22	UGUCGUGGGGCUUGCUGGCUUG	ENST00000345617 // sense // intron // 22 /// ENST00000494800 // sense // intron // 1 /// ENST00000543185 // sense // intron // 16 /// OTTHUMT00000257174 // sense // intron // 22 /// OTTHUMT00000326233 // sense // intron // 1	---	miRBase
MIMAT0018961_st	hsa-miR-4443	0.113976	0.809326	0.992346	7.42127	7.22787	5.83628	7.2469	6.70621	6.87423	MIMAT0018961	miRNA	Homo sapiens	chr3:48238062-48238078 (+)	17	UUGGAGGCGUGGGUUUU	---	---	miRBase
MIMAT0018964_st	hsa-miR-4445-3p	0.860645	0.0513529	0.992346	0.0141332	0.812964	1.00742	1.10042	1.42553	1.89049	MIMAT0018964	miRNA	Homo sapiens	chr3:109321718-109321738 (+)	21	CACGGCAAAAGAAACAAUCCA	---	---	miRBase
MIMAT0018965_st	hsa-miR-4446-3p	0.820162	0.0706016	0.992346	0.600571	1.30035	0.563524	2.23863	1.07822	1.60808	MIMAT0018965	miRNA	Homo sapiens	chr3:113313765-113313786 (+)	22	CAGGGCUGGCAGUGACAUGGGU	ENST00000264852 // sense // intron // 10 /// ENST00000393830 // sense // intron // 10 /// ENST00000480746 // sense // intron // 1 /// ENST00000488390 // sense // intron // 3 /// OTTHUMT00000317564 // sense // intron // 10 /// OTTHUMT00000317567 // sense // intron // 3 /// OTTHUMT00000354232 // sense // intron // 1	---	miRBase
MIMAT0018966_st	hsa-miR-4447	-0.397079	0.366502	0.992346	1.75539	0.652956	0.325162	0.783452	0.335925	0.422898	MIMAT0018966	miRNA	Homo sapiens	chr3:116569136-116569152 (-)	17	GGUGGGGGCUGUUGUUU	ENST00000474851 // sense // intron // 2 /// ENST00000539563 // sense // intron // 1 /// OTTHUMT00000354805 // sense // intron // 2	---	miRBase
MIMAT0018968_st	hsa-miR-4449	0.328684	0.422644	0.992346	2.95415	2.72168	1.63214	2.85659	2.72168	2.71575	MIMAT0018968	miRNA	Homo sapiens	chr4:53578887-53578908 (+)	22	CGUCCCGGGGCUGCGCGAGGCA	ENST00000411630 // sense // intron // 1 /// ENST00000441504 // sense // intron // 1 /// OTTHUMT00000336530 // sense // intron // 1 /// OTTHUMT00000336532 // sense // intron // 1	---	miRBase
MIMAT0018974_st	hsa-miR-4452	-0.246707	0.462667	0.992346	0.239554	0.463635	-0.140319	-0.493949	0.129223	0.187475	MIMAT0018974	miRNA	Homo sapiens	chr4:87463638-87463660 (-)	23	UUGAAUUCUUGGCCUUAAGUGAU	ENST00000502302 // sense // intron // 1 /// ENST00000512046 // sense // intron // 1 /// ENST00000513186 // sense // intron // 1 /// ENST00000513839 // sense // intron // 1 /// OTTHUMT00000361713 // sense // intron // 1 /// OTTHUMT00000361717 // sense // intron // 1 /// OTTHUMT00000361718 // sense // intron // 1 /// OTTHUMT00000361719 // sense // intron // 1	---	miRBase
MIMAT0018976_st	hsa-miR-4454	1.04987	0.052041	0.992346	4.28814	3.88636	5.48026	5.31656	6.0021	5.48572	MIMAT0018976	miRNA	Homo sapiens	chr4:164014759-164014778 (-)	20	GGAUCCGAGUCACGGCACCA	---	---	miRBase
MIMAT0018977_st	hsa-miR-4455	-0.283774	0.546376	0.992346	3.49669	2.98826	2.16875	3.00901	1.9316	2.86177	MIMAT0018977	miRNA	Homo sapiens	chr4:185859575-185859591 (-)	17	AGGGUGUGUGUGUUUUU	---	---	miRBase
MIMAT0018980_st	hsa-miR-4458	-0.193923	0.638573	0.992346	0.739243	1.13698	0.330131	1.03475	-0.149402	0.739243	MIMAT0018980	miRNA	Homo sapiens	chr5:8461046-8461064 (+)	19	AGAGGUAGGUGUGGAAGAA	---	---	miRBase
MIMAT0018981_st	hsa-miR-4459	-0.309375	0.368927	0.992346	6.05269	5.94197	5.7442	5.92597	5.0542	5.83056	MIMAT0018981	miRNA	Homo sapiens	chr5:53371390-53371411 (-)	22	CCAGGAGGCGGAGGAGGUGGAG	ENST00000502271 // sense // intron // 4 /// ENST00000504924 // sense // intron // 4 /// ENST00000507646 // sense // intron // 4 /// ENST00000510591 // sense // intron // 4 /// OTTHUMT00000368429 // sense // intron // 4 /// OTTHUMT00000368430 // sense // intron // 4 /// OTTHUMT00000368431 // sense // intron // 4 /// OTTHUMT00000368432 // sense // intron // 4	---	miRBase
MIMAT0018986_st	hsa-miR-4462	0.00293876	0.994468	0.998769	5.88867	6.0233	5.23257	6.01674	4.96997	6.16665	MIMAT0018986	miRNA	Homo sapiens	chr6:37523142-37523164 (-)	23	UGACACGGAGGGUGGCUUGGGAA	---	---	miRBase
MIMAT0018987_st	hsa-miR-4463	0.15607	0.776483	0.992346	6.09645	6.13684	4.55724	6.24677	5.02066	5.9913	MIMAT0018987	miRNA	Homo sapiens	chr6:76138162-76138178 (+)	17	GAGACUGGGGUGGGGCC	ENST00000237172 // antisense // intron // 1 /// ENST00000393004 // antisense // intron // 1 /// OTTHUMT00000041263 // antisense // intron // 1	---	miRBase
MIMAT0018993_st	hsa-miR-4466	-0.0738335	0.788538	0.992346	7.41582	7.80518	7.7078	7.40456	7.59686	7.70589	MIMAT0018993	miRNA	Homo sapiens	chr6:157100844-157100861 (-)	18	GGGUGCGGGCCGGCGGGG	ENST00000275248 // antisense // intron // 1 /// ENST00000346085 // antisense // intron // 1 /// ENST00000350026 // antisense // intron // 1 /// ENST00000367148 // antisense // intron // 1 /// ENST00000414678 // antisense // intron // 1 /// OTTHUMT00000042827 // antisense // intron // 1 /// OTTHUMT00000042831 // antisense // intron // 1 /// OTTHUMT00000372723 // antisense // intron // 1	---	miRBase
MIMAT0018994_st	hsa-miR-4467	0.280737	0.533817	0.992346	1.88058	3.17683	2.84999	2.40605	3.39344	2.95012	MIMAT0018994	miRNA	Homo sapiens	chr7:102111919-102111940 (+)	22	UGGCGGCGGUAGUUAUGGGCUU	ENST00000292616 // sense // intron // 11 /// ENST00000468175 // sense // intron // 2 /// ENST00000473880 // sense // exon // 7 /// OTTHUMT00000349493 // sense // intron // 11 /// OTTHUMT00000349494 // sense // exon // 7 /// OTTHUMT00000349501 // sense // intron // 2	hsa-mir-4467 // chr7:102111916-102111978 (+) /// hsa-mir-5090 // chr7:102106189-102106273 (+)	miRBase
MIMAT0018999_st	hsa-miR-4472	-0.308498	0.541093	0.992346	0.948644	2.26845	1.55639	2.08903	0.694872	1.06409	MIMAT0018999	miRNA	Homo sapiens	chr12:116866099-116866116 (-) /// chr8:143257757-143257774 (+)	18	GGUGGGGGGUGUUGUUUU	---	---	miRBase
MIMAT0019001_st	hsa-miR-4474-3p	-0.162956	0.5798	0.992346	0.310034	0.347486	0.6925	-0.0130674	0.410584	0.463635	MIMAT0019001	miRNA	Homo sapiens	chr9:20502275-20502296 (-)	22	UUGUGGCUGGUCAUGAGGCUAA	ENST00000355930 // sense // intron // 2 /// ENST00000380338 // sense // intron // 2 /// ENST00000429426 // sense // intron // 2 /// ENST00000475957 // sense // intron // 2 /// OTTHUMT00000051872 // sense // intron // 2 /// OTTHUMT00000051879 // sense // intron // 2	---	miRBase
MIMAT0019003_st	hsa-miR-4476	0.23211	0.481267	0.992346	0.517578	0.0897153	0.253678	0.927594	0.526733	0.102976	MIMAT0019003	miRNA	Homo sapiens	chr9:36893463-36893484 (-)	22	CAGGAAGGAUUUAGGGACAGGC	ENST00000358127 // sense // intron // 7 /// ENST00000377840 // sense // intron // 6 /// ENST00000377847 // sense // intron // 7 /// ENST00000377852 // sense // intron // 7 /// ENST00000377853 // sense // intron // 7 /// ENST00000414447 // sense // intron // 6 /// ENST00000446742 // sense // intron // 6 /// ENST00000520154 // sense // intron // 6 /// ENST00000520281 // sense // intron // 6 /// ENS…	---	miRBase
MIMAT0019006_st	hsa-miR-4478	-0.0362361	0.948123	0.998769	1.49151	0.759119	0.81879	0.833345	0.0167124	2.11065	MIMAT0019006	miRNA	Homo sapiens	chr9:124882426-124882442 (-)	17	GAGGCUGAGCUGAGGAG	---	---	miRBase
MIMAT0019015_st	hsa-miR-4481	-0.47809	0.312563	0.992346	4.33956	4.02821	2.92508	3.58267	2.77274	3.50317	MIMAT0019015	miRNA	Homo sapiens	chr10:12695180-12695196 (-)	17	GGAGUGGGCUGGUGGUU	ENST00000378845 // antisense // intron // 2 /// ENST00000378847 // antisense // intron // 2 /// ENST00000487696 // antisense // intron // 1 /// OTTHUMT00000046820 // antisense // intron // 2 /// OTTHUMT00000046821 // antisense // intron // 2 /// OTTHUMT00000046822 // antisense // intron // 1	---	miRBase
MIMAT0020958_st	hsa-miR-4482-3p	-0.521221	0.197504	0.992346	1.1374	1.12494	0.169703	0.673949	0.169703	0.0247284	MIMAT0020958	miRNA	Homo sapiens	chr10:106028099-106028120 (-)	22	UUUCUAUUUCUCAGUGGGGCUC	ENST00000583050 // sense // exon // 1	---	miRBase
MIMAT0019018_st	hsa-miR-4484	-0.130091	0.688951	0.992346	10.6743	10.9775	10.3023	10.4039	10.2802	10.8798	MIMAT0019018	miRNA	Homo sapiens	chr10:127508372-127508391 (+)	20	AAAAGGCGGGAGAAGCCCCA	ENST00000368774 // antisense // intron // 1 /// ENST00000368778 // antisense // intron // 1 /// ENST00000368797 // antisense // intron // 1 /// ENST00000420761 // antisense // intron // 1 /// OTTHUMT00000050929 // antisense // intron // 1 /// OTTHUMT00000050931 // antisense // intron // 1 /// OTTHUMT00000050932 // antisense // intron // 1 /// OTTHUMT00000050934 // antisense // intron // 1	---	miRBase
MIMAT0019020_st	hsa-miR-4486	-0.0292179	0.942027	0.998769	6.19279	6.69936	5.95848	6.60907	5.55581	6.59809	MIMAT0019020	miRNA	Homo sapiens	chr11:19596861-19596877 (+)	17	GCUGGGCGAGGCUGGCA	ENST00000360655 // sense // intron // 1 /// OTTHUMT00000389876 // sense // intron // 1	---	miRBase
MIMAT0019021_st	hsa-miR-4487	0.131522	0.661502	0.992346	4.88657	4.43097	4.5286	4.98096	4.82003	4.43972	MIMAT0019021	miRNA	Homo sapiens	chr11:47422574-47422592 (+)	19	AGAGCUGGCUGAAGGGCAG	ENST00000532340 // antisense // intron // 2 /// ENST00000532943 // antisense // intron // 2 /// OTTHUMT00000395647 // antisense // intron // 2 /// OTTHUMT00000395648 // antisense // intron // 2	---	miRBase
MIMAT0019022_st	hsa-miR-4488	0.115404	0.687388	0.992346	6.82424	7.34872	7.21995	7.09712	7.38016	7.26183	MIMAT0019022	miRNA	Homo sapiens	chr11:61276071-61276088 (+)	18	AGGGGGCGGGCUCCGGCG	---	---	miRBase
MIMAT0019025_st	hsa-miR-4490	-0.0411508	0.924873	0.998769	-0.128704	0.774754	1.47765	0.774754	0.566861	0.658629	MIMAT0019025	miRNA	Homo sapiens	chr11:90288953-90288974 (-)	22	UCUGGUAAGAGAUUUGGGCAUA	ENST00000561596 // antisense // intron // 2 /// ENST00000562245 // antisense // intron // 2 /// ENST00000562678 // antisense // intron // 2 /// ENST00000563681 // antisense // intron // 2 /// OTTHUMT00000421420 // antisense // intron // 2 /// OTTHUMT00000421430 // antisense // intron // 2 /// OTTHUMT00000421431 // antisense // intron // 2 /// OTTHUMT00000421432 // antisense // intron // 2	---	miRBase
MIMAT0019027_st	hsa-miR-4492	-0.000979438	0.997607	0.998769	4.95849	5.33578	5.52166	4.88696	5.64456	5.28148	MIMAT0019027	miRNA	Homo sapiens	chr11:118781474-118781490 (+)	17	GGGGCUGGGCGCGCGCC	ENST00000334801 // antisense // 5UTR // 1 /// ENST00000526143 // antisense // intron // 1 /// ENST00000530293 // antisense // intron // 1 /// ENST00000532899 // antisense // intron // 1 /// OTTHUMT00000389653 // antisense // 5UTR // 1 /// OTTHUMT00000389654 // antisense // intron // 1 /// OTTHUMT00000389658 // antisense // intron // 1 /// OTTHUMT00000389660 // antisense // intron // 1	---	miRBase
MIMAT0019032_st	hsa-miR-4497	0.184196	0.700659	0.992346	7.88268	8.69483	7.1242	7.91915	7.70665	8.6285	MIMAT0019032	miRNA	Homo sapiens	chr12:110271155-110271171 (+)	17	CUCCGGGACGGCUGGGC	ENST00000261740 // antisense // intron // 1 /// ENST00000346520 // antisense // intron // 1 /// ENST00000392719 // antisense // intron // 1 /// ENST00000538125 // antisense // intron // 1 /// OTTHUMT00000403271 // antisense // intron // 1 /// OTTHUMT00000403272 // antisense // intron // 1	---	miRBase
MIMAT0019033_st	hsa-miR-4498	0.14178	0.82342	0.992346	1.41551	3.59604	3.76525	3.10652	2.85337	3.24224	MIMAT0019033	miRNA	Homo sapiens	chr12:120593277-120593298 (-)	22	UGGGCUGGCAGGGCAAGUGCUG	ENST00000300648 // sense // intron // 29 /// ENST00000548132 // sense // intron // 1 /// ENST00000551920 // sense // intron // 3 /// OTTHUMT00000403592 // sense // intron // 29 /// OTTHUMT00000403595 // sense // intron // 1 /// OTTHUMT00000403596 // sense // intron // 3	---	miRBase
MIMAT0019035_st	hsa-miR-4499	-0.0939478	0.74493	0.992346	0.367138	0.342334	0.333665	0.313195	0.539543	-0.0914437	MIMAT0019035	miRNA	Homo sapiens	chr13:21007969-21007985 (-)	17	AAGACUGAGAGGAGGGA	ENST00000298248 // sense // intron // 4 /// ENST00000382812 // sense // intron // 5 /// ENST00000480748 // sense // intron // 2 /// OTTHUMT00000044071 // sense // intron // 4 /// OTTHUMT00000044072 // sense // intron // 5 /// OTTHUMT00000044073 // sense // intron // 2	---	miRBase
MIMAT0019038_st	hsa-miR-4502	-0.0647406	0.901984	0.998769	5.75311	5.21072	4.26123	5.76615	4.30939	4.9553	MIMAT0019038	miRNA	Homo sapiens	chr13:115039360-115039381 (+)	22	GCUGAUGAUGAUGGUGCUGAAG	---	---	miRBase
MIMAT0019041_st	hsa-miR-4505	0.188135	0.516205	0.992346	5.32483	5.48908	5.05177	5.47695	5.25973	5.69341	MIMAT0019041	miRNA	Homo sapiens	chr14:74225452-74225469 (+)	18	AGGCUGGGCUGGGACGGA	ENST00000286523 // antisense // intron // 1 /// ENST00000394071 // antisense // intron // 1 /// ENST00000435371 // antisense // intron // 1 /// ENST00000486739 // antisense // intron // 2 /// OTTHUMT00000317793 // antisense // intron // 1 /// OTTHUMT00000317794 // antisense // intron // 1 /// OTTHUMT00000317799 // antisense // intron // 2	---	miRBase
MIMAT0019042_st	hsa-miR-4506	-0.262654	0.57908	0.992346	1.41661	1.27049	0.46017	0.933338	-0.0133714	1.43934	MIMAT0019042	miRNA	Homo sapiens	chr14:94414579-94414598 (-)	20	AAAUGGGUGGUCUGAGGCAA	ENST00000315988 // sense // intron // 4 /// ENST00000555019 // sense // intron // 6 /// ENST00000555507 // sense // intron // 4 /// ENST00000556337 // sense // intron // 2 /// OTTHUMT00000412844 // sense // intron // 6 /// OTTHUMT00000412845 // sense // intron // 4 /// OTTHUMT00000412847 // sense // intron // 4 /// OTTHUMT00000412848 // sense // intron // 2	---	miRBase
MIMAT0019044_st	hsa-miR-4507	-0.129139	0.66497	0.992346	6.2578	6.60803	6.32339	6.29262	5.94948	6.5597	MIMAT0019044	miRNA	Homo sapiens	chr14:106324294-106324313 (-)	20	CUGGGUUGGGCUGGGCUGGG	ENST00000581318 // sense // exon // 1	hsa-mir-4507 // chr14:106324293-106324344 (-) /// hsa-mir-4537 // chr14:106325653-106325722 (-) /// hsa-mir-4538 // chr14:106324334-106324411 (-) /// hsa-mir-4539 // chr14:106323682-106323741 (-)	miRBase
MIMAT0019045_st	hsa-miR-4508	-0.708996	0.040777	0.992346	8.09664	7.44238	7.64363	7.11018	6.87367	7.07182	MIMAT0019045	miRNA	Homo sapiens	chr15:23807254-23807270 (-)	17	GCGGGGCUGGGCGCGCG	---	---	miRBase
MIMAT0004909_st	hsa-miR-450b-5p	0.809135	0.0712906	0.992346	1.38963	1.41566	1.12288	1.68374	2.90551	1.76633	MIMAT0004909	miRNA	Homo sapiens	chrX:133674261-133674282 (-)	22	UUUUGCAAUAUGUUCCUGAAUA	---	hsa-mir-424 // chrX:133680644-133680741 (-) /// hsa-mir-450a-1 // chrX:133674371-133674461 (-) /// hsa-mir-450a-2 // chrX:133674538-133674637 (-) /// hsa-mir-503 // chrX:133680358-133680428 (-) /// hsa-mir-542 // chrX:133675371-133675467 (-) /// hsa-mir-450b // chrX:133674215-133674292 (-)	miRBase
MIMAT0019050_st	hsa-miR-4513	-0.00811428	0.977349	0.998769	0.94539	0.371548	0.681886	0.533019	0.670013	0.771449	MIMAT0019050	miRNA	Homo sapiens	chr15:75081064-75081085 (-)	22	AGACUGACGGCUGGAGGCCCAU	ENST00000220003 // antisense // intron // 1 /// ENST00000439220 // antisense // intron // 2 /// ENST00000563894 // antisense // intron // 1 /// ENST00000567123 // antisense // intron // 1 /// ENST00000567571 // antisense // intron // 1 /// ENST00000569462 // antisense // intron // 1 /// OTTHUMT00000286398 // antisense // intron // 1 /// OTTHUMT00000421491 // antisense // intron // 2 /// OTTHUMT00…	---	miRBase
MIMAT0019053_st	hsa-miR-4516	0.278597	0.361533	0.992346	7.93896	7.72051	7.42522	8.14534	7.68791	8.08723	MIMAT0019053	miRNA	Homo sapiens	chr16:2183121-2183137 (+)	17	GGGAGAAGGGUCGGGGC	ENST00000262304 // antisense // intron // 1 /// ENST00000423118 // antisense // intron // 1 /// OTTHUMT00000341688 // antisense // intron // 1 /// OTTHUMT00000341689 // antisense // intron // 1	hsa-mir-3180-5 // chr16:2185978-2186130 (-) /// hsa-mir-4516 // chr16:2183120-2183205 (+)	miRBase
MIMAT0019055_st	hsa-miR-4518	0.815567	0.0790074	0.992346	0.442455	1.48528	0.9866	2.38556	1.34149	1.63399	MIMAT0019055	miRNA	Homo sapiens	chr16:30515289-30515314 (+)	26	GCUCAGGGAUGAUAACUGUGCUGAGA	ENST00000356798 // sense // intron // 17 /// ENST00000358164 // sense // intron // 15 /// ENST00000433423 // sense // intron // 4 /// ENST00000563615 // sense // intron // 2 /// ENST00000568926 // sense // intron // 3 /// ENST00000568987 // sense // intron // 2 /// OTTHUMT00000434508 // sense // intron // 17 /// OTTHUMT00000434511 // sense // intron // 15 /// OTTHUMT00000434512 // sense // intron…	---	miRBase
MIMAT0001631_st	hsa-miR-451a	0.579075	0.0952361	0.992346	0.714944	0.912258	1.15144	1.8893	1.46646	1.16011	MIMAT0001631	miRNA	Homo sapiens	chr17:27188421-27188442 (-)	22	AAACCGUUACCAUUACUGAGUU	ENST00000582320 // sense // exon // 1 /// OTTHUMT00000446722 // sense // exon // 1	hsa-mir-144 // chr17:27188551-27188636 (-) /// hsa-mir-451a // chr17:27188387-27188458 (-) /// hsa-mir-451b // chr17:27188389-27188456 (+) /// hsa-mir-4732 // chr17:27188673-27188748 (-)	miRBase
MIMAT0019064_st	hsa-miR-4525	0.282757	0.563556	0.992346	1.11841	2.23084	1.60816	1.21575	1.86331	2.72663	MIMAT0019064	miRNA	Homo sapiens	chr17:80626157-80626177 (-)	21	GGGGGGAUGUGCAUGCUGGUU	ENST00000269347 // sense // intron // 2 /// ENST00000538809 // sense // intron // 1 /// ENST00000571554 // sense // intron // 1 /// ENST00000571995 // sense // intron // 1 /// ENST00000572603 // sense // intron // 1 /// OTTHUMT00000439007 // sense // intron // 1 /// OTTHUMT00000439009 // sense // intron // 2 /// OTTHUMT00000439014 // sense // intron // 1 /// OTTHUMT00000439017 // sense // intron …	---	miRBase
MIMAT0019068_st	hsa-miR-4529-3p	1.1043	0.0865395	0.992346	1.20562	0.746363	2.05278	2.11672	3.54189	1.65907	MIMAT0019068	miRNA	Homo sapiens	chr18:53146501-53146521 (+)	21	AUUGGACUGCUGAUGGCCCGU	ENST00000354452 // antisense // intron // 3 /// ENST00000356073 // antisense // intron // 3 /// ENST00000398339 // antisense // intron // 4 /// ENST00000537578 // antisense // intron // 2 /// ENST00000540999 // antisense // intron // 2 /// ENST00000543082 // antisense // intron // 1 /// ENST00000562543 // antisense // intron // 3 /// ENST00000562847 // antisense // intron // 3 /// ENST00000563824…	---	miRBase
MIMAT0019069_st	hsa-miR-4530	-0.882748	0.0265317	0.992346	4.90043	4.02414	4.70156	3.68623	3.47934	3.81231	MIMAT0019069	miRNA	Homo sapiens	chr19:39900269-39900286 (-)	18	CCCAGCAGGACGGGAGCG	---	---	miRBase
MIMAT0019071_st	hsa-miR-4532	0.100774	0.767471	0.992346	10.4862	10.59	10.1626	10.9791	10.0371	10.525	MIMAT0019071	miRNA	Homo sapiens	chr20:56470455-56470471 (+)	17	CCCCGGGGAGCCCGGCG	---	---	miRBase
MIMAT0019072_st	hsa-miR-4533	-0.0482492	0.905111	0.998769	0.703451	1.25513	0.81685	1.21553	0.115659	1.2995	MIMAT0019072	miRNA	Homo sapiens	chr20:59053177-59053198 (+)	22	UGGAAGGAGGUUGCCGGACGCU	ENST00000437035 // sense // intron // 4 /// OTTHUMT00000079949 // sense // intron // 4	---	miRBase
MIMAT0019073_st	hsa-miR-4534	0.136741	0.835448	0.992346	1.63272	2.9745	1.18075	2.69135	0.889178	2.61767	MIMAT0019073	miRNA	Homo sapiens	chr22:38384836-38384852 (+)	17	GGAUGGAGGAGGGGUCU	ENST00000333418 // sense // intron // 1 /// ENST00000405557 // sense // intron // 4 /// ENST00000407936 // sense // intron // 5 /// ENST00000427034 // sense // intron // 1 /// OTTHUMT00000321578 // sense // intron // 5 /// OTTHUMT00000321579 // sense // intron // 4 /// OTTHUMT00000321580 // sense // intron // 1 /// OTTHUMT00000321581 // sense // intron // 1	---	miRBase
MIMAT0019075_st	hsa-miR-4535	0.321261	0.548972	0.992346	2.84135	4.30357	4.49638	4.1574	3.6732	4.77447	MIMAT0019075	miRNA	Homo sapiens	chr22:49176143-49176159 (+)	17	GUGGACCUGGCUGGGAC	ENST00000336769 // sense // intron // 3 /// OTTHUMT00000317503 // sense // intron // 3	---	miRBase
MIMAT0019081_st	hsa-miR-4538	-0.414126	0.484605	0.992346	3.65767	4.414	2.24753	3.51034	2.57465	2.99183	MIMAT0019081	miRNA	Homo sapiens	chr14:106324390-106324411 (-)	22	GAGCUUGGAUGAGCUGGGCUGA	---	hsa-mir-4507 // chr14:106324293-106324344 (-) /// hsa-mir-4537 // chr14:106325653-106325722 (-) /// hsa-mir-4538 // chr14:106324334-106324411 (-) /// hsa-mir-4539 // chr14:106323682-106323741 (-)	miRBase
MIMAT0019082_st	hsa-miR-4539	0.295808	0.577442	0.992346	3.70102	5.64411	4.73342	5.26398	4.53588	5.16611	MIMAT0019082	miRNA	Homo sapiens	chr14:106323682-106323703 (-)	22	GCUGAACUGGGCUGAGCUGGGC	---	hsa-mir-4507 // chr14:106324293-106324344 (-) /// hsa-mir-4537 // chr14:106325653-106325722 (-) /// hsa-mir-4538 // chr14:106324334-106324411 (-) /// hsa-mir-4539 // chr14:106323682-106323741 (-)	miRBase
MIMAT0004784_st	hsa-miR-455-3p	0.307903	0.40166	0.992346	4.52065	4.43165	4.87842	4.86452	5.47337	4.41654	MIMAT0004784	miRNA	Homo sapiens	chr9:116971767-116971787 (+)	21	GCAGUCCAUGGGCAUAUACAC	ENST00000356083 // sense // intron // 10 /// ENST00000451716 // sense // intron // 5 /// ENST00000494090 // sense // intron // 7 /// OTTHUMT00000053763 // sense // intron // 10 /// OTTHUMT00000053764 // sense // intron // 7 /// OTTHUMT00000053766 // sense // intron // 5	---	miRBase
MIMAT0022977_st	hsa-miR-4632-5p	-0.356409	0.349528	0.992346	6.03997	6.04061	5.6415	5.91115	4.89225	5.84946	MIMAT0022977	miRNA	Homo sapiens	chr1:12251770-12251792 (+)	23	GAGGGCAGCGUGGGUGUGGCGGA	ENST00000376259 // sense // intron // 3 /// ENST00000492361 // sense // intron // 2 /// ENST00000536782 // sense // intron // 3 /// OTTHUMT00000005133 // sense // intron // 3 /// OTTHUMT00000005134 // sense // intron // 2	---	miRBase
MIMAT0019691_st	hsa-miR-4634	0.457902	0.321653	0.992346	2.0651	3.06237	3.39428	3.00763	3.84554	3.04228	MIMAT0019691	miRNA	Homo sapiens	chr5:174178746-174178764 (+)	19	CGGCGCGACCGGCCCGGGG	ENST00000502684 // sense // intron // 1 /// OTTHUMT00000371782 // sense // intron // 1	---	miRBase
MIMAT0019692_st	hsa-miR-4635	1.14382	0.134777	0.992346	0.693731	0.463635	1.96071	1.49256	3.64037	1.41661	MIMAT0019692	miRNA	Homo sapiens	chr5:1063019-1063039 (-)	21	UCUUGAAGUCAGAACCCGCAA	ENST00000264930 // sense // intron // 20 /// ENST00000513223 // sense // intron // 5 /// ENST00000514994 // sense // intron // 1 /// OTTHUMT00000366446 // sense // intron // 20 /// OTTHUMT00000366450 // sense // intron // 5 /// OTTHUMT00000366451 // sense // intron // 1	---	miRBase
MIMAT0019695_st	hsa-miR-4638-5p	0.198394	0.563625	0.992346	0.713334	1.07389	0.821866	1.46761	0.526733	1.20992	MIMAT0019695	miRNA	Homo sapiens	chr5:180649612-180649632 (-)	21	ACUCGGCUGCGGUGGACAAGU	ENST00000515499 // antisense // 3UTR // 1 /// OTTHUMT00000372937 // antisense // 3UTR // 1	---	miRBase
MIMAT0019699_st	hsa-miR-4640-5p	0.382917	0.589459	0.992346	1.23297	3.17313	2.97295	3.19634	1.66857	3.66288	MIMAT0019699	miRNA	Homo sapiens	chr6:30858668-30858690 (+)	23	UGGGCCAGGGAGCAGCUGGUGGG	ENST00000324771 // sense // intron // 6 /// ENST00000376567 // sense // intron // 3 /// ENST00000376568 // sense // intron // 4 /// ENST00000376569 // sense // intron // 5 /// ENST00000376570 // sense // intron // 6 /// ENST00000376575 // sense // intron // 6 /// ENST00000396342 // sense // intron // 4 /// ENST00000418800 // sense // intron // 4 /// ENST00000421124 // sense // intron // 4 /// ENS…	---	miRBase
MIMAT0019702_st	hsa-miR-4642	0.606171	0.140073	0.992346	0.515871	0.968076	1.76691	1.8417	1.59912	1.62854	MIMAT0019702	miRNA	Homo sapiens	chr6:44403387-44403408 (+)	22	AUGGCAUCGUCCCCUGGUGGCU	ENST00000371477 // sense // intron // 14 /// OTTHUMT00000040743 // sense // intron // 14	---	miRBase
MIMAT0019704_st	hsa-miR-4644	-0.453947	0.209641	0.992346	0.216191	0.535198	1.20208	0.289103	0.0134237	0.289103	MIMAT0019704	miRNA	Homo sapiens	chr6:170639901-170639923 (+)	23	UGGAGAGAGAAAAGAGACAGAAG	ENST00000252510 // sense // intron // 2 /// ENST00000366751 // sense // intron // 4 /// ENST00000476287 // sense // intron // 4 /// ENST00000537664 // sense // intron // 4 /// ENST00000540480 // sense // intron // 4 /// OTTHUMT00000043259 // sense // intron // 4 /// OTTHUMT00000043261 // sense // intron // 4	---	miRBase
MIMAT0019707_st	hsa-miR-4646-5p	0.394963	0.398558	0.992346	1.49955	1.8339	1.2221	2.53427	0.996855	2.20932	MIMAT0019707	miRNA	Homo sapiens	chr6:31668847-31668868 (-)	22	ACUGGGAAGAGGAGCUGAGGGA	ENST00000375842 // sense // intron // 3 /// ENST00000395952 // sense // intron // 3 /// ENST00000440843 // sense // intron // 1 /// ENST00000461287 // sense // intron // 5 /// ENST00000468037 // sense // intron // 3 /// ENST00000477462 // sense // intron // 1 /// ENST00000482224 // sense // intron // 2 /// ENST00000492084 // sense // intron // 3 /// ENST00000495769 // sense // intron // 2 /// ENS…	---	miRBase
MIMAT0019709_st	hsa-miR-4647	-1.07888	0.0758659	0.992346	3.8837	4.12224	3.1734	3.56838	1.63191	2.74242	MIMAT0019709	miRNA	Homo sapiens	chr6:44221990-44222012 (-)	23	GAAGAUGGUGCUGUGCUGAGGAA	ENST00000393810 // sense // 3UTR // 3 /// ENST00000393812 // sense // 3UTR // 4 /// ENST00000495706 // sense // exon // 3 /// OTTHUMT00000040723 // sense // exon // 3 /// OTTHUMT00000040724 // sense // 3UTR // 4 /// OTTHUMT00000040725 // sense // 3UTR // 3	---	miRBase
MIMAT0019711_st	hsa-miR-4649-5p	0.543699	0.121559	0.992346	3.78837	4.5777	4.29475	4.60962	4.66364	5.01866	MIMAT0019711	miRNA	Homo sapiens	chr7:44150450-44150473 (+)	24	UGGGCGAGGGGUGGGCUCUCAGAG	ENST00000223357 // sense // intron // 12 /// ENST00000434445 // sense // 3UTR // 2 /// ENST00000450684 // sense // 3UTR // 1 /// OTTHUMT00000250993 // sense // intron // 12 /// OTTHUMT00000339661 // sense // 3UTR // 1 /// OTTHUMT00000339687 // sense // 3UTR // 2	---	miRBase
MIMAT0019715_st	hsa-miR-4651	0.196129	0.621855	0.992346	5.46775	5.72966	4.48857	5.43214	5.19647	5.64576	MIMAT0019715	miRNA	Homo sapiens	chr7:75544524-75544543 (+)	20	CGGGGUGGGUGAGGUCGGGC	ENST00000394893 // sense // intron // 1 /// ENST00000412521 // sense // 3UTR // 1 /// ENST00000414186 // sense // 3UTR // 1 /// ENST00000419840 // sense // intron // 1 /// ENST00000421059 // sense // 3UTR // 1 /// ENST00000439963 // sense // intron // 1 /// ENST00000448410 // sense // intron // 1 /// ENST00000453773 // sense // intron // 1 /// ENST00000461988 // sense // intron // 1 /// ENST00000…	---	miRBase
MIMAT0019720_st	hsa-miR-4654	-0.291854	0.467041	0.992346	0.519363	1.52076	0.901913	1.22915	0.371867	0.465458	MIMAT0019720	miRNA	Homo sapiens	chr1:162126906-162126927 (+)	22	UGUGGGAUCUGGAGGCAUCUGG	ENST00000361897 // sense // intron // 2 /// ENST00000430120 // sense // intron // 2 /// ENST00000530878 // sense // intron // 2 /// OTTHUMT00000060555 // sense // intron // 2 /// OTTHUMT00000382762 // sense // intron // 2 /// OTTHUMT00000382763 // sense // intron // 2	---	miRBase
MIMAT0019721_st	hsa-miR-4655-5p	0.469013	0.385534	0.992346	1.94899	3.90421	3.34725	3.5013	3.25181	3.85437	MIMAT0019721	miRNA	Homo sapiens	chr7:1883859-1883880 (-)	22	CACCGGGGAUGGCAGAGGGUCG	ENST00000265854 // sense // intron // 17 /// ENST00000318959 // antisense // intron // 1 /// ENST00000399654 // sense // intron // 18 /// ENST00000402221 // antisense // intron // 1 /// ENST00000402746 // sense // intron // 16 /// ENST00000406869 // sense // intron // 18 /// ENST00000450235 // sense // intron // 5 /// ENST00000481633 // sense // intron // 1 /// OTTHUMT00000322869 // sense // intr…	---	miRBase
MIMAT0019723_st	hsa-miR-4656	0.267298	0.366029	0.992346	3.30726	3.59769	3.27879	3.46102	3.96072	3.56389	MIMAT0019723	miRNA	Homo sapiens	chr7:4828239-4828261 (-)	23	UGGGCUGAGGGCAGGAGGCCUGU	ENST00000348624 // antisense // intron // 12 /// ENST00000401897 // antisense // intron // 12 /// ENST00000469614 // antisense // exon // 1 /// ENST00000477454 // antisense // intron // 3 /// ENST00000477680 // antisense // intron // 10 /// ENST00000496303 // antisense // intron // 12 /// OTTHUMT00000323771 // antisense // intron // 12 /// OTTHUMT00000323772 // antisense // intron // 10 /// OTTHU…	---	miRBase
MIMAT0019724_st	hsa-miR-4657	-0.0717685	0.845282	0.992346	0.220529	1.18859	0.0944136	0.297864	0.526733	0.463635	MIMAT0019724	miRNA	Homo sapiens	chr7:44921377-44921399 (-)	23	AAUGUGGAAGUGGUCUGAGGCAU	ENST00000395699 // sense // 3UTR // 1 /// OTTHUMT00000251332 // sense // 3UTR // 1	---	miRBase
MIMAT0019735_st	hsa-miR-4663	-0.13056	0.848976	0.992346	3.41605	1.5947	1.02468	2.30989	1.03187	2.30199	MIMAT0019735	miRNA	Homo sapiens	chr8:124228071-124228094 (-)	24	AGCUGAGCUCCAUGGACGUGCAGU	---	---	miRBase
MIMAT0019739_st	hsa-miR-4665-5p	-0.287982	0.435158	0.992346	2.32146	3.42836	2.76485	2.76485	2.38092	2.50495	MIMAT0019739	miRNA	Homo sapiens	chr9:6007835-6007857 (+)	23	CUGGGGGACGCGUGAGCGCGAGC	ENST00000513355 // antisense // 5UTR // 1 /// OTTHUMT00000400996 // antisense // 5UTR // 1	---	miRBase
MIMAT0019743_st	hsa-miR-4667-5p	0.518132	0.131547	0.992346	0.901913	1.0584	0.871912	1.32579	1.1215	1.93933	MIMAT0019743	miRNA	Homo sapiens	chr9:35608093-35608114 (+)	22	ACUGGGGAGCAGAAGGAGAACC	ENST00000336395 // sense // intron // 7 /// ENST00000463897 // sense // intron // 2 /// ENST00000467424 // sense // intron // 3 /// ENST00000480077 // sense // intron // 1 /// ENST00000498522 // sense // intron // 6 /// OTTHUMT00000052314 // sense // intron // 7 /// OTTHUMT00000052315 // sense // intron // 6 /// OTTHUMT00000052316 // sense // intron // 3 /// OTTHUMT00000052317 // sense // intron …	---	miRBase
MIMAT0019745_st	hsa-miR-4668-5p	1.02062	0.174785	0.992346	6.44052	8.52926	9.29808	8.9701	9.36035	8.99929	MIMAT0019745	miRNA	Homo sapiens	chr9:114694380-114694402 (+)	23	AGGGAAAAAAAAAAGGAUUUGUC	ENST00000374279 // sense // intron // 7 /// OTTHUMT00000053661 // sense // intron // 7	---	miRBase
MIMAT0019749_st	hsa-miR-4669	-0.102306	0.843575	0.992346	1.09341	2.60156	2.25145	1.72864	1.30613	2.60473	MIMAT0019749	miRNA	Homo sapiens	chr9:137271295-137271316 (+)	22	UGUGUCCGGGAAGUGGAGGAGG	ENST00000356384 // sense // intron // 2 /// ENST00000481739 // sense // intron // 1 /// ENST00000484822 // sense // intron // 2 /// OTTHUMT00000054948 // sense // intron // 2 /// OTTHUMT00000054949 // sense // intron // 1 /// OTTHUMT00000054950 // sense // intron // 2	---	miRBase
MIMAT0019754_st	hsa-miR-4672	0.0684951	0.805601	0.992346	0.220264	0.250728	0.463635	0.632774	0.16522	0.342119	MIMAT0019754	miRNA	Homo sapiens	chr9:130631704-130631724 (-)	21	UUACACAGCUGGACAGAGGCA	ENST00000223836 // sense // intron // 4 /// ENST00000373156 // sense // intron // 5 /// ENST00000373176 // sense // intron // 5 /// ENST00000413016 // sense // intron // 2 /// ENST00000476274 // sense // intron // 6 /// ENST00000550143 // sense // intron // 2 /// ENST00000550992 // sense // intron // 5 /// OTTHUMT00000054307 // sense // intron // 5 /// OTTHUMT00000054309 // sense // intron // 5 /…	---	miRBase
MIMAT0019756_st	hsa-miR-4674	-1.31487	0.0360608	0.992346	3.27533	4.30373	4.30357	1.668	2.87356	3.39647	MIMAT0019756	miRNA	Homo sapiens	chr9:139440634-139440654 (-)	21	CUGGGCUCGGGACGCGCGGCU	ENST00000429224 // antisense // exon // 1 /// OTTHUMT00000055084 // antisense // exon // 1	---	miRBase
MIMAT0019767_st	hsa-miR-4682	0.623281	0.0771823	0.992346	0.828343	0.00843292	0.610419	1.18195	1.0818	1.05329	MIMAT0019767	miRNA	Homo sapiens	chr10:121718034-121718056 (+)	23	UCUGAGUUCCUGGAGCCUGGUCU	---	---	miRBase
MIMAT0019770_st	hsa-miR-4684-3p	0.117408	0.670707	0.992346	0.517578	0.892149	0.522927	0.908699	0.72517	0.651009	MIMAT0019770	miRNA	Homo sapiens	chr1:23046059-23046080 (+)	22	UGUUGCAAGUCGGUGGAGACGU	ENST00000374630 // sense // intron // 1 /// ENST00000374632 // sense // intron // 1 /// ENST00000400191 // sense // intron // 1 /// ENST00000544305 // sense // intron // 1 /// OTTHUMT00000008059 // sense // intron // 1 /// OTTHUMT00000008060 // sense // intron // 1 /// OTTHUMT00000008061 // sense // intron // 1	---	miRBase
MIMAT0019771_st	hsa-miR-4685-5p	-0.0414176	0.936036	0.998769	1.43428	2.46605	3.37934	2.72127	2.07389	2.36026	MIMAT0019771	miRNA	Homo sapiens	chr10:100191089-100191114 (-)	26	CCCAGGGCUUGGAGUGGGGCAAGGUU	ENST00000325103 // sense // intron // 6 /// ENST00000338546 // sense // intron // 6 /// ENST00000361490 // sense // intron // 6 /// ENST00000414009 // sense // intron // 1 /// ENST00000467246 // sense // intron // 6 /// ENST00000470095 // sense // intron // 1 /// ENST00000478087 // sense // intron // 1 /// ENST00000480020 // sense // intron // 5 /// ENST00000498219 // sense // intron // 5 /// OTT…	---	miRBase
MIMAT0019773_st	hsa-miR-4686	0.0162525	0.961285	0.998769	0.517578	1.14349	1.14744	1.16592	0.54786	1.14349	MIMAT0019773	miRNA	Homo sapiens	chr11:2194302-2194324 (+)	23	UAUCUGCUGGGCUUUCUGGUGUU	---	---	miRBase
MIMAT0019775_st	hsa-miR-4687-3p	0.0908793	0.776731	0.992346	7.33062	7.09507	6.56217	7.24522	6.83781	7.17747	MIMAT0019775	miRNA	Homo sapiens	chr11:3877343-3877363 (+)	21	UGGCUGUUGGAGGGGGCAGGC	ENST00000300737 // sense // 3UTR // 1 /// ENST00000525403 // sense // intron // 1 /// OTTHUMT00000257196 // sense // 3UTR // 1 /// OTTHUMT00000383059 // sense // intron // 1	---	miRBase
MIMAT0019777_st	hsa-miR-4688	0.427319	0.332102	0.992346	0.330102	1.57524	1.56137	1.21575	1.79197	1.74094	MIMAT0019777	miRNA	Homo sapiens	chr11:46398006-46398027 (+)	22	UAGGGGCAGCAGAGGACCUGGG	ENST00000318201 // sense // intron // 22 /// ENST00000343674 // sense // intron // 23 /// ENST00000395574 // sense // intron // 23 /// ENST00000421244 // sense // intron // 23 /// ENST00000454345 // sense // intron // 24 /// ENST00000456247 // sense // intron // 23 /// ENST00000524984 // sense // intron // 23 /// ENST00000527911 // sense // intron // 23 /// ENST00000528173 // sense // intron // 2…	---	miRBase
MIMAT0019778_st	hsa-miR-4689	0.574608	0.348176	0.992346	4.27529	4.46557	2.72211	4.88535	3.51681	4.78465	MIMAT0019778	miRNA	Homo sapiens	chr1:5922771-5922792 (-)	22	UUGAGGAGACAUGGUGGGGGCC	---	---	miRBase
MIMAT0019779_st	hsa-miR-4690-5p	-0.114057	0.747231	0.992346	3.81343	4.4834	4.66233	4.43035	3.81143	4.37521	MIMAT0019779	miRNA	Homo sapiens	chr11:65403781-65403802 (+)	22	GAGCAGGCGAGGCUGGGCUGAA	ENST00000355703 // sense // intron // 33 /// ENST00000439247 // sense // intron // 13 /// OTTHUMT00000390321 // sense // intron // 33 /// OTTHUMT00000390324 // sense // intron // 13	---	miRBase
MIMAT0019789_st	hsa-miR-4695-3p	0.229429	0.694849	0.992346	0.274057	2.61239	1.09658	1.68697	1.41661	1.56773	MIMAT0019789	miRNA	Homo sapiens	chr1:19209698-19209719 (-)	22	UGAUCUCACCGCUGCCUCCUUC	ENST00000290597 // sense // intron // 6 /// ENST00000375341 // sense // intron // 6 /// ENST00000432718 // sense // intron // 5 /// ENST00000454547 // sense // intron // 2 /// ENST00000494072 // sense // intron // 14 /// ENST00000538309 // sense // intron // 6 /// ENST00000538839 // sense // intron // 6 /// OTTHUMT00000006954 // sense // intron // 6 /// OTTHUMT00000006955 // sense // intron // 6 …	---	miRBase
MIMAT0019788_st	hsa-miR-4695-5p	0.053765	0.854935	0.994373	3.74055	4.31483	4.06607	3.91889	4.06078	4.30308	MIMAT0019788	miRNA	Homo sapiens	chr1:19209744-19209765 (-)	22	CAGGAGGCAGUGGGCGAGCAGG	ENST00000290597 // sense // intron // 6 /// ENST00000375341 // sense // intron // 6 /// ENST00000432718 // sense // intron // 5 /// ENST00000454547 // sense // intron // 2 /// ENST00000494072 // sense // intron // 14 /// ENST00000538309 // sense // intron // 6 /// ENST00000538839 // sense // intron // 6 /// OTTHUMT00000006954 // sense // intron // 6 /// OTTHUMT00000006955 // sense // intron // 6 …	---	miRBase
MIMAT0019793_st	hsa-miR-4698	-0.18955	0.489105	0.992346	0.394809	0.648783	0.388308	0.394809	0.371867	0.0965743	MIMAT0019793	miRNA	Homo sapiens	chr12:47581643-47581665 (+)	23	UCAAAAUGUAGAGGAAGACCCCA	ENST00000546455 // sense // intron // 2 /// OTTHUMT00000405079 // sense // intron // 2	---	miRBase
MIMAT0019796_st	hsa-miR-4700-5p	-0.468358	0.337188	0.992346	1.16525	1.27049	-0.094059	-0.215925	0.371867	0.780659	MIMAT0019796	miRNA	Homo sapiens	chr12:121161005-121161026 (+)	22	UCUGGGGAUGAGGACAGUGUGU	ENST00000344651 // sense // exon // 5 /// ENST00000544939 // antisense // intron // 1 /// OTTHUMT00000402857 // sense // exon // 5 /// OTTHUMT00000402860 // antisense // intron // 1	---	miRBase
MIMAT0019799_st	hsa-miR-4701-3p	-0.546275	0.353338	0.992346	6.43389	5.78783	4.89048	6.00347	4.26382	5.20609	MIMAT0019799	miRNA	Homo sapiens	chr12:49165763-49165782 (-)	20	AUGGGUGAUGGGUGUGGUGU	ENST00000307885 // sense // intron // 17 /// ENST00000357869 // sense // intron // 16 /// ENST00000547260 // sense // intron // 4 /// ENST00000548351 // sense // intron // 4 /// ENST00000550422 // sense // intron // 17 /// ENST00000552099 // sense // intron // 5 /// OTTHUMT00000408860 // sense // intron // 4 /// OTTHUMT00000408862 // sense // intron // 17 /// OTTHUMT00000408863 // sense // intron…	---	miRBase
MIMAT0019803_st	hsa-miR-4704-5p	0.197054	0.605799	0.992346	0.638916	1.16362	0.582579	1.02086	0.419865	1.53555	MIMAT0019803	miRNA	Homo sapiens	chr13:66792391-66792412 (+)	22	GACACUAGGCAUGUGAGUGAUU	---	---	miRBase
MIMAT0019806_st	hsa-miR-4706	-0.0322746	0.909205	0.998769	4.8029	5.16751	5.06107	5.04062	4.72292	5.17111	MIMAT0019806	miRNA	Homo sapiens	chr14:65511415-65511439 (+)	25	AGCGGGGAGGAAGUGGGCGCUGCUU	ENST00000246166 // sense // intron // 9 /// ENST00000341653 // antisense // intron // 3 /// ENST00000447296 // sense // intron // 11 /// ENST00000448390 // sense // intron // 7 /// ENST00000542227 // sense // intron // 10 /// ENST00000549987 // sense // intron // 11 /// ENST00000552941 // sense // intron // 10 /// ENST00000554334 // sense // intron // 7 /// OTTHUMT00000286387 // antisense // intr…	---	miRBase
MIMAT0019807_st	hsa-miR-4707-5p	0.0439841	0.896401	0.998769	4.84529	5.68669	5.56614	5.15975	5.63539	5.43494	MIMAT0019807	miRNA	Homo sapiens	chr14:23426207-23426229 (-)	23	GCCCCGGCGCGGGCGGGUUCUGG	ENST00000206474 // sense // 5UTR // 1 /// ENST00000342454 // sense // 5UTR // 1 /// ENST00000347758 // sense // 5UTR // 1 /// ENST00000397409 // sense // 5UTR // 1 /// ENST00000490506 // sense // 5UTR // 1 /// ENST00000541587 // sense // 5UTR // 1 /// ENST00000553794 // sense // exon // 1 /// ENST00000554349 // sense // exon // 1 /// ENST00000554406 // sense // 5UTR // 1 /// ENST00000554516 // se…	---	miRBase
MIMAT0019810_st	hsa-miR-4708-3p	0.471417	0.193823	0.992346	0.371867	1.01073	1.18302	1.58226	1.41063	0.986979	MIMAT0019810	miRNA	Homo sapiens	chr14:65801841-65801862 (-)	22	AGCAAGGCGGCAUCUCUCUGAU	---	---	miRBase
MIMAT0019809_st	hsa-miR-4708-5p	-0.465761	0.421756	0.992346	0.701527	1.42018	2.90612	1.47344	0.941347	1.21575	MIMAT0019809	miRNA	Homo sapiens	chr14:65801873-65801893 (-)	21	AGAGAUGCCGCCUUGCUCCUU	---	---	miRBase
MIMAT0019812_st	hsa-miR-4709-3p	0.162763	0.697193	0.992346	1.30716	0.926162	1.04034	1.95519	0.499594	1.30716	MIMAT0019812	miRNA	Homo sapiens	chr14:74946838-74946860 (-)	23	UUGAAGAGGAGGUGCUCUGUAGC	ENST00000238633 // sense // 3UTR // 5 /// ENST00000434013 // sense // intron // 4 /// ENST00000541064 // sense // 3UTR // 4 /// ENST00000553490 // sense // exon // 5 /// ENST00000554482 // sense // 3UTR // 4 /// ENST00000555619 // sense // 3UTR // 5 /// ENST00000556009 // sense // 3UTR // 5 /// ENST00000557510 // sense // 3UTR // 4 /// OTTHUMT00000412344 // sense // intron // 4 /// OTTHUMT0000041…	---	miRBase
MIMAT0019815_st	hsa-miR-4710	-0.571759	0.229586	0.992346	4.71371	4.83695	4.25118	4.5851	3.11654	4.38492	MIMAT0019815	miRNA	Homo sapiens	chr14:105144060-105144077 (-)	18	GGGUGAGGGCAGGUGGUU	---	---	miRBase
MIMAT0019827_st	hsa-miR-4716-3p	0.198046	0.562846	0.992346	0.639261	1.0915	0.323747	1.21575	0.531837	0.901058	MIMAT0019827	miRNA	Homo sapiens	chr15:49461276-49461297 (-)	22	AAGGGGGAAGGAAACAUGGAGA	ENST00000327171 // antisense // intron // 1 /// ENST00000558775 // antisense // intron // 2 /// ENST00000559040 // antisense // intron // 1 /// ENST00000559883 // antisense // intron // 2 /// ENST00000559963 // antisense // intron // 2 /// ENST00000560654 // antisense // intron // 2 /// ENST00000561074 // antisense // intron // 1 /// OTTHUMT00000417847 // antisense // intron // 2 /// OTTHUMT00000…	---	miRBase
MIMAT0019830_st	hsa-miR-4717-3p	0.0665043	0.822009	0.992346	4.84547	5.40517	5.15155	5.35022	4.95402	5.29747	MIMAT0019830	miRNA	Homo sapiens	chr16:2324662-2324682 (+)	21	ACACAUGGGUGGCUGUGGCCU	---	hsa-mir-940 // chr16:2321748-2321841 (+) /// hsa-mir-3677 // chr16:2320714-2320773 (+) /// hsa-mir-4717 // chr16:2324621-2324692 (+)	miRBase
MIMAT0019833_st	hsa-miR-4720-5p	0.153676	0.841106	0.992346	0.252905	2.36694	1.60903	0.932465	3.00192	0.75553	MIMAT0019833	miRNA	Homo sapiens	chr16:81418626-81418647 (+)	22	CCUGGCAUAUUUGGUAUAACUU	ENST00000568107 // sense // exon // 1 /// OTTHUMT00000431707 // sense // exon // 1	---	miRBase
MIMAT0019835_st	hsa-miR-4721	1.03076	0.320031	0.992346	5.20881	5.30963	1.47172	4.94238	4.82003	5.32003	MIMAT0019835	miRNA	Homo sapiens	chr16:28855248-28855269 (-)	22	UGAGGGCUCCAGGUGACGGUGG	ENST00000313511 // sense // intron // 8 /// ENST00000565012 // sense // 3UTR // 7 /// ENST00000569217 // sense // intron // 1 /// OTTHUMT00000214140 // sense // intron // 8 /// OTTHUMT00000432662 // sense // intron // 1 /// OTTHUMT00000433580 // sense // 3UTR // 7	---	miRBase
MIMAT0019837_st	hsa-miR-4722-3p	-0.264184	0.64995	0.992346	1.1005	2.56007	2.79438	1.24023	2.70701	1.71515	MIMAT0019837	miRNA	Homo sapiens	chr16:88782686-88782707 (-)	22	ACCUGCCAGCACCUCCCUGCAG	ENST00000301015 // sense // intron // 48 /// ENST00000327397 // sense // intron // 7 /// ENST00000419505 // sense // intron // 7 /// ENST00000472168 // sense // intron // 2 /// ENST00000484567 // sense // intron // 4 /// OTTHUMT00000345699 // sense // intron // 48 /// OTTHUMT00000345701 // sense // intron // 7 /// OTTHUMT00000345702 // sense // intron // 4 /// OTTHUMT00000345711 // sense // intro…	---	miRBase
MIMAT0019844_st	hsa-miR-4725-3p	0.438569	0.216562	0.992346	1.92884	2.47242	1.74885	2.39623	2.86525	2.20433	MIMAT0019844	miRNA	Homo sapiens	chr17:29902345-29902366 (+)	22	UGGGGAAGGCGUCAGUGUCGGG	ENST00000412403 // sense // intron // 2 /// OTTHUMT00000256194 // sense // intron // 2	hsa-mir-365b // chr17:29902430-29902540 (+) /// hsa-mir-4725 // chr17:29902288-29902377 (+)	miRBase
MIMAT0019845_st	hsa-miR-4726-5p	0.106484	0.797699	0.992346	2.00113	2.67658	2.3848	2.85964	1.68749	2.83482	MIMAT0019845	miRNA	Homo sapiens	chr17:36875944-36875966 (+)	23	AGGGCCAGAGGAGCCUGGAGUGG	ENST00000325718 // sense // intron // 13 /// ENST00000471200 // sense // intron // 3 /// ENST00000494578 // sense // intron // 1 /// ENST00000579499 // antisense // intron // 1 /// OTTHUMT00000256799 // sense // intron // 13 /// OTTHUMT00000256801 // sense // intron // 1 /// OTTHUMT00000256802 // sense // intron // 3 /// OTTHUMT00000442306 // antisense // intron // 1	---	miRBase
MIMAT0019848_st	hsa-miR-4727-3p	0.0810882	0.882524	0.998769	0.161504	0.291214	1.93698	1.34278	0.347485	0.942691	MIMAT0019848	miRNA	Homo sapiens	chr17:36982124-36982145 (+)	22	AUAGUGGGAAGCUGGCAGAUUC	---	---	miRBase
MIMAT0019849_st	hsa-miR-4728-5p	-0.248391	0.589455	0.992346	4.20861	4.92664	4.71712	4.70565	3.4749	4.92665	MIMAT0019849	miRNA	Homo sapiens	chr17:37882749-37882771 (+)	23	UGGGAGGGGAGAGGCAGCAAGCA	ENST00000269571 // sense // intron // 23 /// ENST00000406381 // sense // intron // 25 /// ENST00000445658 // sense // intron // 17 /// ENST00000540147 // sense // intron // 23 /// ENST00000541774 // sense // intron // 23 /// ENST00000578373 // sense // intron // 23 /// ENST00000584450 // sense // intron // 23 /// ENST00000584601 // sense // intron // 27 /// OTTHUMT00000445614 // sense // intron /…	---	miRBase
MIMAT0019855_st	hsa-miR-4732-5p	0.465454	0.121716	0.992346	1.41597	1.41597	1.10816	1.74885	1.60817	1.97944	MIMAT0019855	miRNA	Homo sapiens	chr17:27188718-27188740 (-)	23	UGUAGAGCAGGGAGCAGGAAGCU	ENST00000582320 // sense // exon // 1 /// OTTHUMT00000446722 // sense // exon // 1	hsa-mir-144 // chr17:27188551-27188636 (-) /// hsa-mir-451a // chr17:27188387-27188458 (-) /// hsa-mir-451b // chr17:27188389-27188456 (+) /// hsa-mir-4732 // chr17:27188673-27188748 (-)	miRBase
MIMAT0019859_st	hsa-miR-4734	0.614684	0.0724885	0.992346	3.80126	3.98621	4.08	4.26515	4.97082	4.47554	MIMAT0019859	miRNA	Homo sapiens	chr17:36858523-36858544 (-)	22	GCUGCGGGCUGCGGUCAGGGCG	---	---	miRBase
MIMAT0019861_st	hsa-miR-4735-3p	-0.00380433	0.988982	0.998769	0.256742	-0.0324801	0.357827	0.0474891	0.364513	0.158675	MIMAT0019861	miRNA	Homo sapiens	chr1:196551547-196551567 (-)	21	AAAGGUGCUCAAAUUAGACAU	ENST00000294725 // sense // intron // 1 /// ENST00000367431 // sense // intron // 1 /// ENST00000367433 // sense // intron // 1 /// ENST00000451324 // sense // intron // 1 /// OTTHUMT00000086418 // sense // intron // 1 /// OTTHUMT00000086419 // sense // intron // 1	---	miRBase
MIMAT0019868_st	hsa-miR-4739	0.254147	0.413011	0.992346	6.92816	7.00616	6.55052	7.0483	6.80079	7.3982	MIMAT0019868	miRNA	Homo sapiens	chr17:77681025-77681049 (-)	25	AAGGGAGGAGGAGCGGAGGGGCCCU	---	---	miRBase
MIMAT0019870_st	hsa-miR-4740-3p	0.613097	0.42096	0.992346	1.03946	2.4239	2.85809	3.08149	3.78124	1.29801	MIMAT0019870	miRNA	Homo sapiens	chr17:79374516-79374537 (-)	22	GCCCGAGAGGAUCCGUCCCUGC	ENST00000307745 // antisense // intron // 1 /// ENST00000572324 // antisense // intron // 1 /// OTTHUMT00000439903 // antisense // intron // 1	---	miRBase
MIMAT0019871_st	hsa-miR-4741	0.589905	0.381141	0.992346	3.13678	3.34178	0.902205	3.28873	2.78142	3.08034	MIMAT0019871	miRNA	Homo sapiens	chr18:20513370-20513392 (+)	23	CGGGCUGUCCGGAGGGGUCGGCU	ENST00000327155 // sense // 3UTR // 1 /// ENST00000577588 // sense // intron // 4 /// ENST00000578831 // antisense // intron // 1 /// ENST00000579124 // sense // intron // 2 /// ENST00000581819 // sense // intron // 2 /// ENST00000582354 // sense // intron // 3 /// ENST00000583700 // sense // intron // 4 /// OTTHUMT00000254699 // sense // 3UTR // 1 /// OTTHUMT00000446381 // sense // intron // 4 /…	---	miRBase
MIMAT0019874_st	hsa-miR-4743-5p	0.378354	0.236967	0.992346	1.34424	1.97944	1.6463	1.80649	2.03709	2.26146	MIMAT0019874	miRNA	Homo sapiens	chr18:46196973-46196995 (+)	23	UGGCCGGAUGGGACAGGAGGCAU	ENST00000256413 // sense // intron // 5 /// ENST00000382998 // sense // intron // 6 /// ENST00000587752 // sense // intron // 5 /// ENST00000589585 // sense // intron // 4 /// OTTHUMT00000255907 // sense // intron // 5 /// OTTHUMT00000448918 // sense // intron // 6 /// OTTHUMT00000448921 // sense // intron // 5 /// OTTHUMT00000449285 // sense // intron // 4	---	miRBase
MIMAT0019878_st	hsa-miR-4745-5p	0.116166	0.742428	0.992346	5.07398	5.59106	4.80667	4.84019	5.3631	5.61692	MIMAT0019878	miRNA	Homo sapiens	chr19:804941-804963 (+)	23	UGAGUGGGGCUCCCGGGACGGCG	ENST00000349038 // sense // intron // 7 /// ENST00000350092 // sense // intron // 2 /// ENST00000356948 // sense // intron // 7 /// ENST00000394601 // sense // intron // 7 /// ENST00000585956 // sense // intron // 2 /// ENST00000586944 // sense // intron // 7 /// ENST00000587136 // sense // exon // 1 /// ENST00000587191 // sense // intron // 2 /// ENST00000592113 // sense // intron // 3 /// ENST0…	hsa-mir-3187 // chr19:813584-813653 (+) /// hsa-mir-4745 // chr19:804940-805001 (+)	miRBase
MIMAT0019882_st	hsa-miR-4747-5p	0.437949	0.186856	0.992346	0.180676	0.221727	-0.41401	0.180676	0.526733	0.594831	MIMAT0019882	miRNA	Homo sapiens	chr19:4932699-4932720 (+)	22	AGGGAAGGAGGCUUGGUCUUAG	ENST00000262952 // sense // intron // 4 /// ENST00000398240 // sense // intron // 3 /// ENST00000543616 // sense // intron // 4 /// ENST00000587187 // sense // intron // 4 /// ENST00000587870 // sense // intron // 1 /// ENST00000591699 // sense // intron // 3 /// ENST00000591733 // sense // intron // 4 /// ENST00000592200 // sense // intron // 4 /// ENST00000592666 // sense // intron // 4 /// OTT…	---	miRBase
MIMAT0019885_st	hsa-miR-4749-5p	0.418624	0.293234	0.992346	3.72928	4.74342	4.87996	4.66975	4.88595	5.05283	MIMAT0019885	miRNA	Homo sapiens	chr19:50357850-50357871 (+)	22	UGCGGGGACAGGCCAGGGCAUC	ENST00000221557 // sense // intron // 2 /// ENST00000391842 // sense // intron // 2 /// ENST00000594151 // sense // intron // 2 /// ENST00000594165 // sense // intron // 2 /// ENST00000594640 // sense // intron // 2 /// ENST00000598325 // sense // intron // 2 /// ENST00000598632 // sense // intron // 2 /// ENST00000599732 // sense // intron // 2 /// ENST00000600603 // sense // intron // 2 /// ENS…	---	miRBase
MIMAT0019887_st	hsa-miR-4750-5p	-0.137538	0.743061	0.992346	4.18509	4.01607	2.98232	4.00896	3.22943	3.53248	MIMAT0019887	miRNA	Homo sapiens	chr19:50391434-50391455 (+)	22	CUCGGGCGGAGGUGGUUGAGUG	ENST00000221543 // sense // intron // 15 /// ENST00000535102 // sense // intron // 14 /// ENST00000594984 // sense // exon // 10 /// ENST00000596243 // sense // intron // 13 /// ENST00000600354 // sense // intron // 2 /// OTTHUMT00000466404 // sense // intron // 15 /// OTTHUMT00000466405 // sense // intron // 14 /// OTTHUMT00000466410 // sense // intron // 13 /// OTTHUMT00000466411 // sense // ex…	---	miRBase
MIMAT0019900_st	hsa-miR-4756-3p	0.0442012	0.887726	0.998769	0.0410333	0.706677	0.776321	0.472508	0.698009	0.486119	MIMAT0019900	miRNA	Homo sapiens	chr20:52684957-52684978 (-)	22	CCAGAGAUGGUUGCCUUCCUAU	ENST00000371435 // sense // intron // 1 /// ENST00000371440 // sense // intron // 1 /// ENST00000395961 // sense // intron // 1 /// ENST00000411563 // sense // intron // 1 /// OTTHUMT00000079766 // sense // intron // 1 /// OTTHUMT00000259203 // sense // intron // 1	---	miRBase
MIMAT0019903_st	hsa-miR-4758-5p	-0.61933	0.0960356	0.992346	5.00362	5.43191	5.48372	4.68471	4.25371	5.12285	MIMAT0019903	miRNA	Homo sapiens	chr20:60907590-60907612 (-)	23	GUGAGUGGGAGCCGGUGGGGCUG	ENST00000252999 // sense // intron // 27 /// OTTHUMT00000080014 // sense // intron // 27	---	miRBase
MIMAT0019913_st	hsa-miR-4763-3p	0.0405755	0.909903	0.998769	6.00571	6.39679	5.49733	6.28022	5.58837	6.15297	MIMAT0019913	miRNA	Homo sapiens	chr22:46509504-46509527 (+)	24	AGGCAGGGGCUGGUGCUGGGCGGG	ENST00000360737 // sense // exon // 5 /// OTTHUMT00000316781 // sense // exon // 5	hsa-let-7a-3 // chr22:46508629-46508702 (+) /// hsa-let-7b // chr22:46509566-46509648 (+) /// hsa-mir-4763 // chr22:46509446-46509537 (+)	miRBase
MIMAT0019922_st	hsa-miR-4769-5p	-0.346158	0.437024	0.992346	2.48301	1.37588	1.21177	1.28742	0.952092	1.79267	MIMAT0019922	miRNA	Homo sapiens	chrX:47446835-47446858 (+)	24	GGUGGGAUGGAGAGAAGGUAUGAG	ENST00000295987 // antisense // intron // 5 /// ENST00000340666 // antisense // intron // 5 /// OTTHUMT00000056445 // antisense // intron // 5 /// OTTHUMT00000056446 // antisense // intron // 5	---	miRBase
MIMAT0019926_st	hsa-miR-4772-5p	0.363322	0.235902	0.992346	0.166079	0.283359	0.27469	0.283359	0.587884	0.94285	MIMAT0019926	miRNA	Homo sapiens	chr2:103048760-103048781 (+)	22	UGAUCAGGCAAAAUUGCAGACU	ENST00000264260 // sense // intron // 5 /// ENST00000409369 // sense // intron // 3 /// OTTHUMT00000253291 // sense // intron // 5 /// OTTHUMT00000329495 // sense // intron // 3	---	miRBase
MIMAT0019932_st	hsa-miR-4776-5p	0.43704	0.254025	0.992346	1.32397	2.3862	1.54497	1.92941	2.3491	2.28775	MIMAT0019932	miRNA	Homo sapiens	chr2:213790990-213791011 (+) /// chr2:213791030-213791051 (-)	22	GUGGACCAGGAUGGCAAGGGCU	ENST00000415387 // antisense // intron // 1 /// OTTHUMT00000337265 // antisense // intron // 1 /// ENST00000415387 // sense // intron // 1 /// OTTHUMT00000337265 // sense // intron // 1	hsa-mir-4776-1 // chr2:213790981-213791060 (+) /// hsa-mir-4776-2 // chr2:213790981-213791060 (-) /// hsa-mir-4776-1 // chr2:213790981-213791060 (+) /// hsa-mir-4776-2 // chr2:213790981-213791060 (-)	miRBase
MIMAT0019947_st	hsa-miR-4783-3p	-0.298017	0.561008	0.992346	2.90462	3.8184	2.49904	3.12142	1.92827	3.27832	MIMAT0019947	miRNA	Homo sapiens	chr2:128181122-128181144 (-)	23	CCCCGGUGUUGGGGCGCGUCUGC	ENST00000234071 // antisense // intron // 6 /// ENST00000402125 // antisense // intron // 1 /// ENST00000409048 // antisense // intron // 4 /// ENST00000422777 // antisense // intron // 5 /// ENST00000442644 // antisense // intron // 6 /// ENST00000453608 // antisense // intron // 5 /// ENST00000464089 // antisense // intron // 1 /// OTTHUMT00000254385 // antisense // intron // 6 /// OTTHUMT00000…	---	miRBase
MIMAT0019948_st	hsa-miR-4784	0.446663	0.225233	0.992346	0.802639	0.38917	0.725828	1.51491	0.52696	1.21575	MIMAT0019948	miRNA	Homo sapiens	chr2:132248781-132248800 (-)	20	UGAGGAGAUGCUGGGACUGA	ENST00000309451 // sense // intron // 2 /// ENST00000410036 // sense // intron // 2 /// ENST00000427024 // sense // intron // 2 /// ENST00000445782 // sense // intron // 2 /// ENST00000488586 // sense // intron // 1 /// ENST00000491265 // sense // exon // 2 /// OTTHUMT00000331811 // sense // intron // 2 /// OTTHUMT00000331812 // sense // intron // 2 /// OTTHUMT00000331813 // sense // intron // 2 …	---	miRBase
MIMAT0019955_st	hsa-miR-4786-3p	0.257523	0.572789	0.992346	0.89589	1.71907	2.53952	1.93124	1.76925	2.22655	MIMAT0019955	miRNA	Homo sapiens	chr2:240882440-240882461 (-)	22	UGAAGCCAGCUCUGGUCUGGGC	ENST00000419408 // sense // intron // 4 /// OTTHUMT00000326148 // sense // intron // 4	---	miRBase
MIMAT0019956_st	hsa-miR-4787-5p	0.0954111	0.714141	0.992346	7.56525	7.66297	7.75084	7.63844	7.75787	7.86898	MIMAT0019956	miRNA	Homo sapiens	chr3:50712524-50712545 (+)	22	GCGGGGGUGGCGGCGGCAUCCC	---	---	miRBase
MIMAT0019963_st	hsa-miR-4791	0.0309476	0.905321	0.998769	0.425821	0.425821	0.56401	0.425821	0.656853	0.425821	MIMAT0019963	miRNA	Homo sapiens	chr3:19356399-19356416 (-)	18	UGGAUAUGAUGACUGAAA	ENST00000328405 // antisense // intron // 3 /// ENST00000452398 // antisense // intron // 3 /// OTTHUMT00000252139 // antisense // intron // 3 /// OTTHUMT00000339563 // antisense // intron // 3	---	miRBase
MIMAT0019966_st	hsa-miR-4793-3p	-0.39386	0.249215	0.992346	8.73077	8.77661	8.22325	8.42051	7.76989	8.35866	MIMAT0019966	miRNA	Homo sapiens	chr3:48681634-48681656 (-)	23	UCUGCACUGUGAGUUGGCUGGCU	ENST00000164024 // sense // intron // 27 /// ENST00000544264 // sense // intron // 28 /// OTTHUMT00000257523 // sense // intron // 27	---	miRBase
MIMAT0019972_st	hsa-miR-4797-5p	-0.101927	0.773733	0.992346	0.800004	1.33886	1.50999	1.57359	0.725237	1.04424	MIMAT0019972	miRNA	Homo sapiens	chr3:197020790-197020810 (-)	21	GACAGAGUGCCACUUACUGAA	ENST00000314062 // sense // intron // 3 /// ENST00000346964 // sense // intron // 3 /// ENST00000357674 // sense // intron // 3 /// ENST00000392380 // sense // intron // 3 /// ENST00000392381 // sense // intron // 3 /// ENST00000392382 // sense // intron // 3 /// ENST00000412364 // sense // intron // 2 /// ENST00000419227 // sense // intron // 3 /// ENST00000419354 // sense // intron // 3 /// ENS…	---	miRBase
MIMAT0019978_st	hsa-miR-4800-5p	0.219048	0.653337	0.992346	1.88546	1.51003	0.156472	1.14948	1.41827	1.64136	MIMAT0019978	miRNA	Homo sapiens	chr4:2251854-2251874 (-)	21	AGUGGACCGAGGAAGGAAGGA	ENST00000337190 // sense // 3UTR // 6 /// ENST00000513372 // sense // exon // 3 /// OTTHUMT00000206519 // sense // 3UTR // 6 /// OTTHUMT00000357529 // sense // exon // 3	---	miRBase
MIMAT0019980_st	hsa-miR-4801	-0.161506	0.540961	0.992346	0.165852	0.232375	0.468568	0.139598	0.139598	0.103082	MIMAT0019980	miRNA	Homo sapiens	chr4:37243533-37243554 (-)	22	UACACAAGAAAACCAAGGCUCA	---	---	miRBase
MIMAT0004761_st	hsa-miR-483-5p	-0.198574	0.631908	0.992346	4.25528	3.66651	2.87132	3.27634	3.22528	3.69577	MIMAT0004761	miRNA	Homo sapiens	chr11:2155411-2155432 (-)	22	AAGACGGGAGGAAAGAAGGGAG	ENST00000300632 // sense // intron // 3 /// ENST00000337883 // sense // intron // 2 /// ENST00000356578 // sense // intron // 5 /// ENST00000381389 // sense // intron // 2 /// ENST00000381392 // sense // intron // 2 /// ENST00000381395 // sense // intron // 2 /// ENST00000381406 // sense // intron // 2 /// ENST00000416167 // sense // intron // 2 /// ENST00000418738 // sense // intron // 2 /// ENS…	---	miRBase
MIMAT0004763_st	hsa-miR-488-3p	-0.381822	0.409802	0.992346	-0.173744	0.90394	1.37099	0.463635	-0.0512987	0.543387	MIMAT0004763	miRNA	Homo sapiens	chr1:176998510-176998530 (-)	21	UUGAAAGGCUAUUUCUUGGUC	ENST00000281881 // sense // intron // 5 /// ENST00000361833 // sense // intron // 5 /// ENST00000367654 // sense // intron // 5 /// ENST00000367657 // sense // intron // 5 /// ENST00000424564 // sense // intron // 5 /// ENST00000473640 // sense // intron // 3 /// OTTHUMT00000084822 // sense // intron // 5 /// OTTHUMT00000084823 // sense // intron // 5 /// OTTHUMT00000084824 // sense // intron // …	---	miRBase
MIMAT0003161_st	hsa-miR-493-3p	0.152178	0.689894	0.992346	0.892063	1.27443	0.85272	1.59024	0.468899	1.41661	MIMAT0003161	miRNA	Homo sapiens	chr14:101335453-101335474 (+)	22	UGAAGGUCUACUGUGUGCCAGG	---	hsa-mir-337 // chr14:101340830-101340922 (+) /// hsa-mir-493 // chr14:101335397-101335485 (+) /// hsa-mir-665 // chr14:101341370-101341441 (+)	miRBase
MIMAT0002816_st	hsa-miR-494-3p	0.222742	0.39598	0.992346	0.388018	0.463635	0.424263	0.708705	0.526733	0.708705	MIMAT0002816	miRNA	Homo sapiens	chr14:101496018-101496039 (+)	22	UGAAACAUACACGGGAAACCUC	---	hsa-mir-299 // chr14:101490131-101490193 (+) /// hsa-mir-379 // chr14:101488403-101488469 (+) /// hsa-mir-380 // chr14:101491354-101491414 (+) /// hsa-mir-323a // chr14:101492069-101492154 (+) /// hsa-mir-329-1 // chr14:101493122-101493201 (+) /// hsa-mir-329-2 // chr14:101493437-101493520 (+) /// hsa-mir-494 // chr14:101495971-101496051 (+) /// hsa-mir-495 // chr14:101500092-101500173 (+) /// hs…	miRBase
MIMAT0002824_st	hsa-miR-498	0.440392	0.324186	0.992346	1.07168	2.55345	1.8489	2.566	1.97467	2.25453	MIMAT0002824	miRNA	Homo sapiens	chr19:54177484-54177506 (+)	23	UUUCAAGCCAGGGGGCGUUUUUC	---	hsa-mir-512-1 // chr19:54169933-54170016 (+) /// hsa-mir-512-2 // chr19:54172411-54172508 (+) /// hsa-mir-498 // chr19:54177451-54177574 (+) /// hsa-mir-520e // chr19:54178965-54179051 (+) /// hsa-mir-515-1 // chr19:54182257-54182339 (+) /// hsa-mir-519e // chr19:54183194-54183277 (+) /// hsa-mir-520f // chr19:54185413-54185499 (+) /// hsa-mir-1323 // chr19:54175222-54175294 (+)	miRBase
MIMAT0021019_st	hsa-miR-5000-5p	-0.387398	0.424742	0.992346	1.34623	0.862862	1.56012	1.47344	-0.0943139	1.22788	MIMAT0021019	miRNA	Homo sapiens	chr2:75317962-75317983 (+)	22	CAGUUCAGAAGUGUUCCUGAGU	ENST00000305249 // antisense // intron // 2 /// ENST00000409848 // antisense // intron // 2 /// OTTHUMT00000252239 // antisense // intron // 2 /// OTTHUMT00000328659 // antisense // intron // 2	---	miRBase
MIMAT0021021_st	hsa-miR-5001-5p	0.349006	0.300984	0.992346	3.71162	4.10394	3.89332	3.76634	4.55862	4.43093	MIMAT0021021	miRNA	Homo sapiens	chr2:233415240-233415263 (-)	24	AGGGCUGGACUCAGCGGCGGAGCU	ENST00000258416 // antisense // 3UTR // 1 /// ENST00000408957 // sense // 5UTR // 1 /// OTTHUMT00000257033 // antisense // 3UTR // 1 /// OTTHUMT00000257037 // sense // 5UTR // 1	---	miRBase
MIMAT0021023_st	hsa-miR-5002-5p	-0.0459777	0.859292	0.996158	0.482193	0.584671	0.59538	0.584671	0.354969	0.584671	MIMAT0021023	miRNA	Homo sapiens	chr3:123851796-123851819 (+)	24	AAUUUGGUUUCUGAGGCACUUAGU	ENST00000240874 // sense // intron // 1 /// ENST00000360013 // sense // intron // 1 /// ENST00000448253 // sense // intron // 2 /// ENST00000460856 // sense // intron // 1 /// ENST00000477496 // sense // intron // 6 /// ENST00000483658 // sense // intron // 3 /// ENST00000488825 // sense // intron // 1 /// OTTHUMT00000258843 // sense // intron // 1 /// OTTHUMT00000259126 // sense // intron // 6 /…	---	miRBase
MIMAT0021027_st	hsa-miR-5004-5p	-0.0987585	0.853492	0.994373	0.0779712	1.38238	1.73563	0.575532	0.63863	1.68555	MIMAT0021027	miRNA	Homo sapiens	chr6:33406128-33406149 (+)	22	UGAGGACAGGGCAAAUUCACGA	ENST00000293748 // sense // 3UTR // 9 /// ENST00000418600 // sense // 3UTR // 9 /// ENST00000428982 // sense // 3UTR // 7 /// ENST00000449372 // sense // 3UTR // 9 /// ENST00000479510 // sense // exon // 9 /// ENST00000496374 // sense // exon // 9 /// OTTHUMT00000076151 // sense // 3UTR // 9 /// OTTHUMT00000258900 // sense // exon // 9 /// OTTHUMT00000258901 // sense // 3UTR // 7 /// OTTHUMT00000…	---	miRBase
MIMAT0021033_st	hsa-miR-5006-5p	-0.0627435	0.873277	0.998769	1.85925	2.74296	2.40855	2.56584	1.66921	2.58748	MIMAT0021033	miRNA	Homo sapiens	chr13:42142491-42142511 (-)	21	UUGCCAGGGCAGGAGGUGGAA	ENST00000379310 // sense // exon // 45 /// OTTHUMT00000354828 // sense // exon // 45	---	miRBase
MIMAT0021043_st	hsa-miR-5010-5p	0.70059	0.09951	0.992346	1.2872	2.06424	0.817117	2.06424	1.89465	2.31143	MIMAT0021043	miRNA	Homo sapiens	chr17:40666226-40666247 (+)	22	AGGGGGAUGGCAGAGCAAAAUU	ENST00000264649 // sense // 3UTR // 20 /// ENST00000343619 // sense // 3UTR // 21 /// ENST00000393829 // sense // 3UTR // 20 /// ENST00000537728 // sense // 3UTR // 19 /// ENST00000544137 // sense // 3UTR // 14 /// ENST00000546249 // sense // 3UTR // 21 /// ENST00000585525 // sense // 3UTR // 20 /// ENST00000585828 // sense // exon // 3 /// ENST00000586201 // sense // intron // 5 /// ENST00000588…	---	miRBase
MIMAT0002874_st	hsa-miR-503-5p	-0.207451	0.671686	0.992346	0.623636	2.24649	1.85332	0.920556	1.76957	1.41097	MIMAT0002874	miRNA	Homo sapiens	chrX:133680401-133680423 (-)	23	UAGCAGCGGGAACAGUUCUGCAG	ENST00000414769 // sense // intron // 1 /// ENST00000440570 // sense // intron // 1 /// ENST00000441492 // sense // intron // 1 /// OTTHUMT00000058369 // sense // intron // 1 /// OTTHUMT00000058370 // sense // intron // 1 /// OTTHUMT00000058372 // sense // intron // 1	hsa-mir-424 // chrX:133680644-133680741 (-) /// hsa-mir-450a-1 // chrX:133674371-133674461 (-) /// hsa-mir-450a-2 // chrX:133674538-133674637 (-) /// hsa-mir-503 // chrX:133680358-133680428 (-) /// hsa-mir-542 // chrX:133675371-133675467 (-) /// hsa-mir-450b // chrX:133674215-133674292 (-)	miRBase
MIMAT0026612_st	hsa-miR-504-3p	0.212368	0.629236	0.992346	1.47005	2.82013	2.26138	2.85339	1.96246	2.3728	MIMAT0026612	miRNA	Homo sapiens	chrX:137749885-137749905 (-)	21	GGGAGUGCAGGGCAGGGUUUC	ENST00000305414 // sense // intron // 3 /// ENST00000315930 // sense // intron // 3 /// ENST00000370603 // sense // intron // 4 /// ENST00000436198 // sense // intron // 5 /// ENST00000441825 // sense // intron // 3 /// ENST00000455663 // sense // intron // 5 /// ENST00000541469 // sense // intron // 3 /// OTTHUMT00000058534 // sense // intron // 3 /// OTTHUMT00000058535 // sense // intron // 3 /…	---	miRBase
MIMAT0021079_st	hsa-miR-5087	1.17936	0.0568254	0.992346	0.867092	1.76571	0.444293	3.00848	1.30406	2.30265	MIMAT0021079	miRNA	Homo sapiens	chr1:147806646-147806668 (-)	23	GGGUUUGUAGCUUUGCUGGCAUG	ENST00000452996 // antisense // intron // 2 /// OTTHUMT00000039540 // antisense // intron // 2	---	miRBase
MIMAT0004975_st	hsa-miR-509-3-5p	-0.231115	0.525279	0.992346	0.435694	0.835787	0.426907	-0.252472	0.466566	0.790949	MIMAT0004975	miRNA	Homo sapiens	chrX:146341214-146341235 (-)	22	UACUGCAGACGUGGCAAUCAUG	---	hsa-mir-509-1 // chrX:146342050-146342143 (-) /// hsa-mir-509-2 // chrX:146340278-146340368 (-) /// hsa-mir-509-3 // chrX:146341170-146341244 (-) /// hsa-mir-514b // chrX:146331669-146331748 (-)	miRBase
MIMAT0021084_st	hsa-miR-5092	-0.0341344	0.927747	0.998769	0.371867	1.27049	0.122021	0.414908	0.456734	0.790332	MIMAT0021084	miRNA	Homo sapiens	chr3:124870319-124870340 (-)	22	AAUCCACGCUGAGCUUGGCAUC	ENST00000314584 // sense // intron // 4 /// ENST00000393469 // sense // intron // 4 /// ENST00000423114 // sense // intron // 5 /// ENST00000469902 // sense // intron // 5 /// ENST00000473262 // sense // intron // 3 /// ENST00000479826 // sense // intron // 2 /// ENST00000485849 // sense // intron // 1 /// OTTHUMT00000355711 // sense // intron // 4 /// OTTHUMT00000355870 // sense // intron // 5 /…	---	miRBase
MIMAT0021085_st	hsa-miR-5093	-0.125355	0.698418	0.992346	6.40804	7.06215	6.37772	6.43278	6.27855	6.76052	MIMAT0021085	miRNA	Homo sapiens	chr16:85339842-85339864 (-)	23	AGGAAAUGAGGCUGGCUAGGAGC	---	---	miRBase
MIMAT0021086_st	hsa-miR-5094	0.433865	0.178459	0.992346	0.385408	0.849975	0.524739	0.848892	1.36467	0.848154	MIMAT0021086	miRNA	Homo sapiens	chr15:90393922-90393943 (-)	22	AAUCAGUGAAUGCCUUGAACCU	ENST00000336418 // sense // intron // 4 /// ENST00000398333 // sense // intron // 8 /// ENST00000423566 // sense // intron // 5 /// ENST00000557999 // sense // intron // 4 /// ENST00000558011 // sense // intron // 5 /// ENST00000558186 // sense // intron // 1 /// ENST00000558648 // sense // intron // 4 /// ENST00000558806 // sense // intron // 4 /// ENST00000558999 // sense // intron // 6 /// ENS…	---	miRBase
MIMAT0020600_st	hsa-miR-5095	0.459272	0.323473	0.992346	0.215967	1.33086	1.85312	1.47344	1.56338	1.74094	MIMAT0020600	miRNA	Homo sapiens	chr1:53400608-53400628 (+)	21	UUACAGGCGUGAACCACCGCG	ENST00000371509 // sense // intron // 1 /// ENST00000371513 // sense // intron // 1 /// ENST00000371514 // sense // intron // 1 /// ENST00000407246 // sense // intron // 1 /// ENST00000478631 // sense // intron // 1 /// ENST00000528311 // sense // intron // 1 /// ENST00000528809 // sense // intron // 1 /// OTTHUMT00000024740 // sense // intron // 1 /// OTTHUMT00000024743 // sense // intron // 1 /…	hsa-mir-5095 // chr1:53400602-53400689 (+) /// hsa-mir-1273f // chr1:53394346-53394444 (+) /// hsa-mir-1273g // chr1:53405986-53406085 (+)	miRBase
MIMAT0020603_st	hsa-miR-5096	0.656633	0.133071	0.992346	1.33058	2.36185	1.25778	2.61498	1.90814	2.39701	MIMAT0020603	miRNA	Homo sapiens	chr4:79741918-79741938 (+)	21	GUUUCACCAUGUUGGUCAGGC	ENST00000335016 // sense // intron // 1 /// ENST00000389010 // sense // intron // 1 /// ENST00000502871 // sense // intron // 1 /// OTTHUMT00000362865 // sense // intron // 1 /// OTTHUMT00000362866 // sense // intron // 1	---	miRBase
MIMAT0002882_st	hsa-miR-510-5p	0.476084	0.123318	0.992346	0.0885367	-0.00319483	0.307114	0.762801	0.742007	0.315901	MIMAT0002882	miRNA	Homo sapiens	chrX:146353896-146353917 (-)	22	UACUCAGGAGAGUGGCAAUCAC	---	hsa-mir-510 // chrX:146353853-146353926 (-) /// hsa-mir-514a-1 // chrX:146360765-146360862 (-) /// hsa-mir-514a-2 // chrX:146363461-146363548 (-)	miRBase
MIMAT0022259_st	hsa-miR-5100	-2.17822	6.79928e-05	0.0480029	4.07003	4.16302	3.82262	1.6532	2.09838	1.76944	MIMAT0022259	miRNA	Homo sapiens	chr10:43493078-43493099 (+)	22	UUCAGAUCCCAGCGGUGCCUCU	---	---	miRBase
MIMAT0015087_st	hsa-miR-514b-5p	0.0956929	0.817875	0.992346	0.427492	0.879928	1.81952	1.04532	0.952092	1.41661	MIMAT0015087	miRNA	Homo sapiens	chrX:146331715-146331736 (-)	22	UUCUCAAGAGGGAGGCAAUCAU	---	hsa-mir-509-2 // chrX:146340278-146340368 (-) /// hsa-mir-509-3 // chrX:146341170-146341244 (-) /// hsa-mir-514b // chrX:146331669-146331748 (-)	miRBase
MIMAT0027088_st	hsa-miR-5189-3p	-0.0960495	0.822708	0.992346	7.62293	6.91662	8.23953	7.16871	7.98189	7.34034	MIMAT0027088	miRNA	Homo sapiens	chr16:88535392-88535412 (+)	21	UGCCAACCGUCAGAGCCCAGA	ENST00000319555 // sense // intron // 1 /// ENST00000562417 // sense // intron // 1 /// ENST00000562437 // sense // intron // 1 /// ENST00000563351 // sense // intron // 1 /// ENST00000569086 // sense // intron // 1 /// OTTHUMT00000422270 // sense // intron // 1 /// OTTHUMT00000422271 // sense // intron // 1 /// OTTHUMT00000422272 // sense // intron // 1 /// OTTHUMT00000422378 // sense // intron …	---	miRBase
MIMAT0021120_st	hsa-miR-5189-5p	-0.95896	0.0243022	0.992346	2.45507	2.19141	2.96759	1.18811	1.56723	1.98185	MIMAT0021120	miRNA	Homo sapiens	chr16:88535351-88535374 (+)	24	UCUGGGCACAGGCGGAUGGACAGG	ENST00000319555 // sense // intron // 1 /// ENST00000562417 // sense // intron // 1 /// ENST00000562437 // sense // intron // 1 /// ENST00000563351 // sense // intron // 1 /// ENST00000569086 // sense // intron // 1 /// OTTHUMT00000422270 // sense // intron // 1 /// OTTHUMT00000422271 // sense // intron // 1 /// OTTHUMT00000422272 // sense // intron // 1 /// OTTHUMT00000422378 // sense // intron …	---	miRBase
MIMAT0021127_st	hsa-miR-5195-3p	-0.863651	0.021266	0.992346	0.970208	1.36938	1.68864	0.412654	0.345077	0.679546	MIMAT0021127	miRNA	Homo sapiens	chr14:107259125-107259145 (-)	21	AUCCAGUUCUCUGAGGGGGCU	---	---	miRBase
MIMAT0021126_st	hsa-miR-5195-5p	0.325197	0.328527	0.992346	0.415327	0.351793	0.937811	1.15752	0.530123	0.992879	MIMAT0021126	miRNA	Homo sapiens	chr14:107259158-107259179 (-)	22	AACCCCUAAGGCAACUGGAUGG	---	---	miRBase
MIMAT0021128_st	hsa-miR-5196-5p	0.189384	0.674985	0.992346	2.99725	2.7624	1.80098	3.28734	2.16634	2.6751	MIMAT0021128	miRNA	Homo sapiens	chr19:35836444-35836465 (+)	22	AGGGAAGGGGACGAGGGUUGGG	ENST00000085219 // sense // 3UTR // 12 /// ENST00000270311 // sense // intron // 10 /// ENST00000341773 // sense // 3UTR // 10 /// ENST00000419549 // sense // 3UTR // 11 /// ENST00000536635 // sense // 3UTR // 11 /// ENST00000544992 // sense // intron // 11 /// ENST00000594250 // sense // 3UTR // 9 /// ENST00000601769 // sense // exon // 12 /// OTTHUMT00000466097 // sense // exon // 12 /// OTTHUM…	---	miRBase
MIMAT0004919_st	hsa-miR-541-5p	-0.116733	0.695354	0.992346	0.653086	0.528363	0.463635	0.733535	0.507375	0.0539756	MIMAT0004919	miRNA	Homo sapiens	chr14:101530841-101530865 (+)	25	AAAGGAUUCUGCUGUCGGUCCCACU	---	hsa-mir-134 // chr14:101521024-101521096 (+) /// hsa-mir-154 // chr14:101526092-101526175 (+) /// hsa-mir-369 // chr14:101531935-101532004 (+) /// hsa-mir-377 // chr14:101528387-101528455 (+) /// hsa-mir-409 // chr14:101531637-101531715 (+) /// hsa-mir-412 // chr14:101531784-101531874 (+) /// hsa-mir-410 // chr14:101532249-101532328 (+) /// hsa-mir-485 // chr14:101521756-101521828 (+) /// hsa-mir…	miRBase
MIMAT0003251_st	hsa-miR-548a-3p	-0.202086	0.580094	0.992346	2.38431	2.72963	3.07495	1.97944	2.72963	2.87356	MIMAT0003251	miRNA	Homo sapiens	chr6:18572075-18572096 (+) /// chr6:135560358-135560379 (+) /// chr8:105496612-105496633 (-)	22	CAAAACUGGCAAUUACUUUUGC	---	---	miRBase
MIMAT0018447_st	hsa-miR-548aa	-0.115117	0.820113	0.992346	0.503126	0.901913	1.04421	0.624981	-0.215925	1.69484	MIMAT0018447	miRNA	Homo sapiens	chr17:65467659-65467683 (+) /// chr8:124360328-124360352 (+)	25	AAAAACCACAAUUACUUUUGCACCA	ENST00000287394 // antisense // intron // 15 /// ENST00000517666 // antisense // intron // 14 /// ENST00000519124 // antisense // intron // 15 /// ENST00000521496 // antisense // intron // 15 /// ENST00000521903 // antisense // intron // 16 /// OTTHUMT00000381765 // antisense // intron // 14 /// OTTHUMT00000381766 // antisense // intron // 15 /// OTTHUMT00000381767 // antisense // intron // 16 //…	hsa-mir-548d-1 // chr8:124360274-124360370 (-) /// hsa-mir-548aa-1 // chr8:124360274-124360370 (+) /// hsa-mir-548d-2 // chr17:65467605-65467701 (-) /// hsa-mir-548aa-2 // chr17:65467605-65467701 (+)	miRBase
MIMAT0018938_st	hsa-miR-548ac	-0.26853	0.496043	0.992346	1.37906	2.09975	1.92228	1.56228	0.958492	2.07473	MIMAT0018938	miRNA	Homo sapiens	chr1:117102660-117102681 (-)	22	CAAAAACCGGCAAUUACUUUUG	ENST00000369487 // sense // intron // 1 /// ENST00000369489 // sense // intron // 1 /// ENST00000457047 // sense // intron // 1 /// ENST00000464088 // sense // intron // 1 /// OTTHUMT00000059036 // sense // intron // 1 /// OTTHUMT00000059037 // sense // intron // 1 /// OTTHUMT00000387904 // sense // intron // 1 /// OTTHUMT00000387905 // sense // intron // 1	---	miRBase
MIMAT0018954_st	hsa-miR-548ae	-0.363336	0.56503	0.992346	0.472868	2.11278	1.98225	0.908416	0.383746	2.18572	MIMAT0018954	miRNA	Homo sapiens	chr2:185243744-185243764 (+) /// chr5:57825874-57825894 (-)	21	CAAAAACUGCAAUUACUUUCA	---	---	miRBase
MIMAT0018990_st	hsa-miR-548aj-3p	0.225614	0.496479	0.992346	0.537798	0.856805	1.13846	0.867865	0.848136	1.4939	MIMAT0018990	miRNA	Homo sapiens	chr6:132436339-132436359 (-) /// chrX:37883165-37883185 (-)	21	UAAAAACUGCAAUUACUUUUA	ENST00000297875 // antisense // intron // 1 /// ENST00000357972 // antisense // intron // 1 /// ENST00000465127 // antisense // intron // 3 /// OTTHUMT00000080883 // antisense // intron // 1 /// OTTHUMT00000363378 // antisense // intron // 3	---	miRBase
MIMAT0021038_st	hsa-miR-548ap-3p	-0.122902	0.756594	0.992346	0.131926	0.911055	1.40175	0.382783	0.87124	0.822003	MIMAT0021038	miRNA	Homo sapiens	chr15:86368923-86368941 (+)	19	AAAAACCACAAUUACUUUU	---	---	miRBase
MIMAT0022264_st	hsa-miR-548aq-3p	0.451281	0.27449	0.992346	0.0182947	1.27391	0.835634	1.32131	1.32131	0.839058	MIMAT0022264	miRNA	Homo sapiens	chr3:185485635-185485656 (-)	22	CAAAAACUGCAAUUACUUUUGC	ENST00000346192 // sense // intron // 2 /// ENST00000382199 // sense // intron // 2 /// ENST00000421047 // sense // intron // 1 /// ENST00000457616 // sense // intron // 2 /// ENST00000461957 // sense // intron // 1 /// ENST00000466476 // sense // intron // 2 /// ENST00000493302 // sense // intron // 1 /// OTTHUMT00000157087 // sense // intron // 2 /// OTTHUMT00000157088 // sense // intron // 2 /…	---	miRBase
MIMAT0022265_st	hsa-miR-548ar-5p	-0.235088	0.394722	0.992346	0.50288	0.173589	0.515401	0.173589	0.262564	0.0504523	MIMAT0022265	miRNA	Homo sapiens	chr13:115009980-115010000 (+)	21	AAAAGUAAUUGCAGUUUUUGC	ENST00000252457 // sense // intron // 8 /// ENST00000252458 // sense // intron // 8 /// ENST00000356221 // sense // intron // 8 /// ENST00000360383 // sense // intron // 8 /// ENST00000375308 // sense // intron // 8 /// ENST00000375310 // sense // intron // 8 /// ENST00000375312 // sense // intron // 8 /// OTTHUMT00000045960 // sense // intron // 8 /// OTTHUMT00000045965 // sense // intron // 8 /…	---	miRBase
MIMAT0004798_st	hsa-miR-548b-5p	-0.776523	0.172174	0.992346	1.09392	2.41417	0.451344	0.327836	0.335981	0.966041	MIMAT0004798	miRNA	Homo sapiens	chr6:119390263-119390284 (-)	22	AAAAGUAAUUGUGGUUUUGGCC	ENST00000338891 // sense // intron // 1 /// ENST00000352896 // sense // intron // 1 /// ENST00000368475 // sense // intron // 1 /// ENST00000521531 // sense // intron // 1 /// ENST00000522284 // sense // intron // 1 /// OTTHUMT00000042009 // sense // intron // 1 /// OTTHUMT00000380866 // sense // intron // 1 /// OTTHUMT00000380867 // sense // intron // 1 /// OTTHUMT00000380868 // sense // intron …	---	miRBase
MIMAT0022723_st	hsa-miR-548h-3p	0.345715	0.373501	0.992346	0.713562	0.95954	1.85119	1.34795	1.78349	1.42999	MIMAT0022723	miRNA	Homo sapiens	chr8:26906388-26906410 (-)	23	CAAAAACCGCAAUUACUUUUGCA	---	---	miRBase
MIMAT0026737_st	hsa-miR-548j-3p	0.162131	0.552887	0.992346	0.470091	0.573471	0.573471	0.573471	0.952092	0.577865	MIMAT0026737	miRNA	Homo sapiens	chr22:26951205-26951225 (-)	21	CAAAAACUGCAUUACUUUUGC	ENST00000338754 // sense // intron // 1 /// ENST00000398110 // sense // intron // 1 /// ENST00000403880 // sense // intron // 1 /// ENST00000440953 // sense // intron // 1 /// ENST00000442495 // sense // intron // 1 /// ENST00000450022 // sense // intron // 1 /// ENST00000453117 // sense // intron // 1 /// OTTHUMT00000320820 // sense // intron // 1 /// OTTHUMT00000320821 // sense // intron // 1 /…	---	miRBase
MIMAT0005882_st	hsa-miR-548k	-0.0379711	0.893771	0.998769	-0.159861	0.103082	0.258251	-0.215925	0.200402	0.103082	MIMAT0005882	miRNA	Homo sapiens	chr11:70130092-70130113 (+)	22	AAAAGUACUUGCGGAUUUUGCU	ENST00000253925 // sense // intron // 2 /// ENST00000389547 // sense // intron // 2 /// ENST00000528607 // antisense // intron // 1 /// ENST00000530746 // sense // intron // 2 /// ENST00000532024 // sense // intron // 1 /// ENST00000532504 // sense // intron // 2 /// OTTHUMT00000393905 // sense // intron // 2 /// OTTHUMT00000393906 // sense // intron // 2 /// OTTHUMT00000393907 // sense // intron…	---	miRBase
MIMAT0022730_st	hsa-miR-548t-3p	-0.115117	0.820113	0.992346	0.503126	0.901913	1.04421	0.624981	-0.215925	1.69484	MIMAT0022730	miRNA	Homo sapiens	chr4:174189356-174189380 (+)	25	AAAAACCACAAUUACUUUUGCACCA	ENST00000265000 // sense // intron // 2 /// ENST00000512285 // sense // intron // 2 /// OTTHUMT00000362456 // sense // intron // 2 /// OTTHUMT00000362459 // sense // intron // 2	---	miRBase
MIMAT0015013_st	hsa-miR-548u	-1.02336	0.0181546	0.992346	1.88051	1.30383	1.83045	0.272937	0.516924	1.15486	MIMAT0015013	miRNA	Homo sapiens	chr6:57254978-57255000 (+)	23	CAAAGACUGCAAUUACUUUUGCG	ENST00000389488 // sense // intron // 7 /// ENST00000490313 // sense // intron // 2 /// OTTHUMT00000043468 // sense // intron // 7 /// OTTHUMT00000043469 // sense // intron // 2	---	miRBase
MIMAT0015081_st	hsa-miR-548x-3p	-0.213095	0.660124	0.992346	0.757376	1.28543	1.9831	1.28543	0.36025	1.74094	MIMAT0015081	miRNA	Homo sapiens	chr13:66540484-66540503 (-) /// chr21:20058418-20058437 (-)	20	UAAAAACUGCAAUUACUUUC	ENST00000355189 // sense // intron // 3 /// ENST00000414582 // sense // intron // 2 /// ENST00000437492 // sense // intron // 2 /// OTTHUMT00000158276 // sense // intron // 2 /// OTTHUMT00000158277 // sense // intron // 3 /// OTTHUMT00000158278 // sense // intron // 2	---	miRBase
MIMAT0018354_st	hsa-miR-548y	0.0592354	0.825627	0.992346	0.108415	0.229253	0.0944136	0.229253	0.392703	-0.0121687	MIMAT0018354	miRNA	Homo sapiens	chr14:48230264-48230285 (-)	22	AAAAGUAAUCACUGUUUUUGCC	---	---	miRBase
MIMAT0018446_st	hsa-miR-548z	0.345715	0.373501	0.992346	0.713562	0.95954	1.85119	1.34795	1.78349	1.42999	MIMAT0018446	miRNA	Homo sapiens	chr12:65016310-65016332 (-)	23	CAAAAACCGCAAUUACUUUUGCA	ENST00000283172 // antisense // intron // 1 /// ENST00000336061 // antisense // intron // 2 /// ENST00000542104 // antisense // intron // 1 /// OTTHUMT00000401160 // antisense // intron // 1 /// OTTHUMT00000401161 // antisense // intron // 1	hsa-mir-548c // chr12:65016289-65016385 (+) /// hsa-mir-548z // chr12:65016289-65016385 (-)	miRBase
MIMAT0004794_st	hsa-miR-551b-5p	-1.45432	0.00385601	0.992346	3.15385	2.83657	3.72935	1.46855	1.668	2.22026	MIMAT0004794	miRNA	Homo sapiens	chr3:168269663-168269684 (+)	22	GAAAUCAAGCGUGGGUGAGACC	ENST00000431685 // sense // intron // 4 /// ENST00000506760 // sense // intron // 1 /// OTTHUMT00000336751 // sense // intron // 4 /// OTTHUMT00000351387 // sense // intron // 1	---	miRBase
MIMAT0004793_st	hsa-miR-556-3p	0.0443416	0.880256	0.998769	0.236488	0.563773	-0.124574	0.335736	0.236488	0.236488	MIMAT0004793	miRNA	Homo sapiens	chr1:162312390-162312411 (+)	22	AUAUUACCAUUAGCUCAUCUUU	ENST00000361897 // sense // intron // 5 /// ENST00000430120 // sense // intron // 5 /// ENST00000530878 // sense // intron // 5 /// OTTHUMT00000060555 // sense // intron // 5 /// OTTHUMT00000382762 // sense // intron // 5 /// OTTHUMT00000382763 // sense // intron // 5	---	miRBase
MIMAT0022260_st	hsa-miR-5572	0.138902	0.819993	0.992346	1.58408	3.30531	2.64773	2.8446	1.65275	3.45647	MIMAT0022260	miRNA	Homo sapiens	chr15:80873520-80873540 (+)	21	GUUGGGGUGCAGGGGUCUGCU	ENST00000303329 // sense // intron // 16 /// ENST00000525505 // sense // intron // 4 /// ENST00000527771 // sense // intron // 16 /// ENST00000533983 // sense // intron // 17 /// OTTHUMT00000384389 // sense // intron // 16 /// OTTHUMT00000384390 // sense // intron // 16 /// OTTHUMT00000384436 // sense // intron // 17 /// OTTHUMT00000384440 // sense // intron // 4	---	miRBase
MIMAT0022281_st	hsa-miR-5583-5p	-0.0653734	0.828484	0.992346	0.419754	0.908574	0.825277	0.450589	0.965286	0.541609	MIMAT0022281	miRNA	Homo sapiens	chr18:37256720-37256741 (-) /// chr18:37256685-37256706 (+)	22	AAACUAAUAUACCCAUAUUCUG	ENST00000591629 // antisense // intron // 2 /// OTTHUMT00000441462 // antisense // intron // 2 /// ENST00000580941 // antisense // exon // 1 /// ENST00000591629 // sense // intron // 2 /// OTTHUMT00000441462 // sense // intron // 2	hsa-mir-5583-1 // chr18:37256685-37256743 (+) /// hsa-mir-5583-2 // chr18:37256683-37256741 (-) /// hsa-mir-5583-1 // chr18:37256685-37256743 (+) /// hsa-mir-5583-2 // chr18:37256683-37256741 (-)	miRBase
MIMAT0022286_st	hsa-miR-5585-3p	0.42385	0.213754	0.992346	0.839058	1.27049	0.495578	1.28161	1.05102	1.54404	MIMAT0022286	miRNA	Homo sapiens	chr1:32552587-32552608 (+)	22	CUGAAUAGCUGGGACUACAGGU	ENST00000336294 // sense // intron // 5 /// ENST00000373634 // sense // intron // 3 /// ENST00000427288 // sense // intron // 6 /// ENST00000438825 // sense // intron // 4 /// ENST00000441402 // sense // intron // 3 /// ENST00000456834 // sense // intron // 4 /// ENST00000466321 // sense // intron // 5 /// ENST00000468135 // sense // intron // 6 /// ENST00000472503 // sense // intron // 5 /// ENS…	---	miRBase
MIMAT0022296_st	hsa-miR-5588-3p	0.020221	0.944133	0.998769	0.665672	0.150975	0.653137	0.360792	0.629577	0.54008	MIMAT0022296	miRNA	Homo sapiens	chr3:184970998-184971016 (-)	19	AAGUCCCACUAAUGCCAGC	ENST00000231887 // sense // intron // 1 /// ENST00000440662 // sense // intron // 1 /// ENST00000456310 // sense // intron // 1 /// ENST00000465178 // sense // intron // 2 /// ENST00000475987 // sense // intron // 1 /// OTTHUMT00000345326 // sense // intron // 1 /// OTTHUMT00000345327 // sense // intron // 1 /// OTTHUMT00000345328 // sense // intron // 2 /// OTTHUMT00000345329 // sense // intron …	---	miRBase
MIMAT0022295_st	hsa-miR-5588-5p	0.351701	0.210824	0.992346	0.0254975	0.123859	0.0167102	0.226551	0.392644	0.601974	MIMAT0022295	miRNA	Homo sapiens	chr3:184971040-184971060 (-)	21	ACUGGCAUUAGUGGGACUUUU	ENST00000231887 // sense // intron // 1 /// ENST00000440662 // sense // intron // 1 /// ENST00000456310 // sense // intron // 1 /// ENST00000465178 // sense // intron // 2 /// ENST00000475987 // sense // intron // 1 /// OTTHUMT00000345326 // sense // intron // 1 /// OTTHUMT00000345327 // sense // intron // 1 /// OTTHUMT00000345328 // sense // intron // 2 /// OTTHUMT00000345329 // sense // intron …	---	miRBase
MIMAT0022297_st	hsa-miR-5589-5p	0.338144	0.468668	0.992346	0.656184	0.656184	0.185412	0.52782	0.208814	1.77558	MIMAT0022297	miRNA	Homo sapiens	chr19:10149030-10149050 (+)	21	GGCUGGGUGCUCUUGUGCAGU	ENST00000497718 // sense // intron // 1 /// OTTHUMT00000351283 // sense // intron // 1	---	miRBase
MIMAT0022469_st	hsa-miR-5681a	-0.123039	0.818402	0.992346	0.372598	1.43123	2.40451	1.15908	1.67378	1.00637	MIMAT0022469	miRNA	Homo sapiens	chr8:75460822-75460843 (+)	22	AGAAAGGGUGGCAAUACCUCUU	---	hsa-mir-5681a // chr8:75460778-75460852 (+) /// hsa-mir-5681b // chr8:75460785-75460844 (-)	miRBase
MIMAT0022491_st	hsa-miR-5698	-0.228364	0.397405	0.992346	1.73672	1.67706	1.8439	1.67706	1.53356	1.36197	MIMAT0022491	miRNA	Homo sapiens	chr1:154077038-154077059 (-)	22	UGGGGGAGUGCAGUGAUUGUGG	ENST00000271854 // sense // intron // 12 /// ENST00000368559 // sense // intron // 12 /// OTTHUMT00000087270 // sense // intron // 12	---	miRBase
MIMAT0003235_st	hsa-miR-570-3p	0.468107	0.275488	0.992346	0.3786	0.894477	0.740079	0.456199	1.12126	1.84002	MIMAT0003235	miRNA	Homo sapiens	chr3:195426331-195426352 (+)	22	CGAAAACAGCAAUUACCUUUGC	ENST00000420851 // sense // intron // 2 /// ENST00000431767 // sense // intron // 1 /// ENST00000438608 // sense // intron // 1 /// ENST00000451228 // sense // intron // 1 /// ENST00000451982 // sense // intron // 5 /// ENST00000594715 // sense // intron // 2 /// ENST00000597034 // sense // intron // 4 /// ENST00000597482 // sense // intron // 5 /// ENST00000599448 // sense // intron // 3 /// ENS…	---	miRBase
MIMAT0022496_st	hsa-miR-5703	0.284542	0.317052	0.992346	0.493981	0.539925	0.531137	0.516923	0.940574	0.961172	MIMAT0022496	miRNA	Homo sapiens	chr2:228336878-228336895 (+)	18	AGGAGAAGUCGGGAAGGU	ENST00000310078 // sense // 3UTR // 1 /// ENST00000409979 // sense // 3UTR // 1 /// OTTHUMT00000256895 // sense // 3UTR // 1 /// OTTHUMT00000331537 // sense // 3UTR // 1	---	miRBase
MIMAT0023116_st	hsa-miR-5739	0.19128	0.779017	0.992346	2.58787	3.8184	1.84359	3.46596	1.74885	3.6089	MIMAT0023116	miRNA	Homo sapiens	chr22:28855913-28855932 (+)	20	GCGGAGAGAGAAUGGGGAGC	ENST00000397906 // antisense // intron // 2 /// OTTHUMT00000320930 // antisense // intron // 2	---	miRBase
MIMAT0003239_st	hsa-miR-574-3p	0.500961	0.128972	0.992346	-0.148051	0.103082	0.118841	0.901913	0.191443	0.483398	MIMAT0003239	miRNA	Homo sapiens	chr4:38869713-38869734 (+)	22	CACGCUCAUGCACACACCCACA	ENST00000358869 // sense // intron // 1 /// ENST00000510213 // sense // intron // 1 /// ENST00000515037 // sense // intron // 1 /// OTTHUMT00000250436 // sense // intron // 1 /// OTTHUMT00000360578 // sense // intron // 1 /// OTTHUMT00000360580 // sense // intron // 1	---	miRBase
MIMAT0004795_st	hsa-miR-574-5p	-0.707519	0.185709	0.992346	4.94896	4.70663	3.80786	4.49054	2.93897	3.91139	MIMAT0004795	miRNA	Homo sapiens	chr4:38869677-38869699 (+)	23	UGAGUGUGUGUGUGUGAGUGUGU	ENST00000358869 // sense // intron // 1 /// ENST00000510213 // sense // intron // 1 /// ENST00000515037 // sense // intron // 1 /// OTTHUMT00000250436 // sense // intron // 1 /// OTTHUMT00000360578 // sense // intron // 1 /// OTTHUMT00000360580 // sense // intron // 1	---	miRBase
MIMAT0023252_st	hsa-miR-5787	0.16995	0.516516	0.992346	9.17509	9.2425	9.09862	9.20755	9.4077	9.41081	MIMAT0023252	miRNA	Homo sapiens	chr3:50264870-50264889 (+)	20	GGGCUGGGGCGCGGGGAGGU	ENST00000422163 // sense // intron // 1 /// ENST00000446079 // sense // intron // 1 /// OTTHUMT00000346690 // sense // intron // 1 /// OTTHUMT00000346691 // sense // intron // 1	---	miRBase
MIMAT0022708_st	hsa-miR-584-3p	0.0350142	0.926943	0.998769	0.941115	1.23185	2.08765	1.40106	1.74885	1.21575	MIMAT0022708	miRNA	Homo sapiens	chr5:148441897-148441918 (-)	22	UCAGUUCCAGGCCAACCAGGCU	ENST00000323829 // sense // intron // 1 /// ENST00000394358 // sense // intron // 1 /// ENST00000504091 // sense // intron // 1 /// ENST00000504690 // sense // intron // 1 /// ENST00000511307 // sense // intron // 1 /// ENST00000511949 // sense // intron // 1 /// ENST00000512049 // sense // intron // 1 /// ENST00000513604 // sense // intron // 1 /// ENST00000515425 // sense // intron // 1 /// OTT…	---	miRBase
MIMAT0026618_st	hsa-miR-585-5p	0.173432	0.542119	0.992346	0.572077	0.205926	0.135109	0.50054	0.629577	0.303292	MIMAT0026618	miRNA	Homo sapiens	chr5:168690653-168690674 (-)	22	CUAGCACACAGAUACGCCCAGA	ENST00000332966 // sense // intron // 1 /// ENST00000404867 // sense // intron // 1 /// ENST00000518140 // sense // intron // 1 /// ENST00000519560 // sense // intron // 1 /// ENST00000521130 // sense // intron // 1 /// OTTHUMT00000252792 // sense // intron // 1 /// OTTHUMT00000371504 // sense // intron // 1 /// OTTHUMT00000371505 // sense // intron // 1 /// OTTHUMT00000376173 // sense // intron …	---	miRBase
MIMAT0003263_st	hsa-miR-595	-0.521598	0.329692	0.992346	6.21883	5.24791	4.93214	5.56036	4.06764	5.20609	MIMAT0003263	miRNA	Homo sapiens	chr7:158325425-158325445 (-)	21	GAAGUGUGCCGUGGUGUGUCU	ENST00000389413 // sense // intron // 1 /// ENST00000389416 // sense // intron // 1 /// ENST00000389418 // sense // intron // 1 /// ENST00000404321 // sense // intron // 1 /// ENST00000409483 // sense // intron // 1 /// OTTHUMT00000327120 // sense // intron // 1 /// OTTHUMT00000327121 // sense // intron // 1 /// OTTHUMT00000353213 // sense // intron // 1 /// OTTHUMT00000353214 // sense // intron …	---	miRBase
MIMAT0003270_st	hsa-miR-602	0.190906	0.64923	0.992346	2.59591	1.35007	2.49309	2.01576	2.628	2.36803	MIMAT0003270	miRNA	Homo sapiens	chr9:140732886-140732908 (+)	23	GACACGGGCGACAGCUGCGGCCC	ENST00000462942 // sense // intron // 20 /// OTTHUMT00000055373 // sense // intron // 20	---	miRBase
MIMAT0003271_st	hsa-miR-603	0.550596	0.169684	0.992346	0.020621	0.267848	0.901913	0.819452	1.43586	0.586855	MIMAT0003271	miRNA	Homo sapiens	chr10:24564674-24564695 (+)	22	CACACACUGCAAUUACUUUUGC	ENST00000376452 // sense // intron // 2 /// ENST00000376454 // sense // intron // 2 /// ENST00000376456 // sense // intron // 2 /// ENST00000376462 // sense // intron // 3 /// ENST00000430453 // sense // intron // 1 /// ENST00000438429 // sense // intron // 1 /// ENST00000458595 // sense // intron // 2 /// OTTHUMT00000047221 // sense // intron // 3 /// OTTHUMT00000047223 // sense // intron // 2 /…	---	miRBase
MIMAT0003273_st	hsa-miR-605-5p	0.338675	0.231599	0.992346	0.103082	0.463635	0.215593	0.656902	0.677799	0.463635	MIMAT0003273	miRNA	Homo sapiens	chr10:53059348-53059370 (+)	23	UAAAUCCCAUGGUGCCUUCUCCU	ENST00000373976 // sense // intron // 1 /// ENST00000373980 // sense // intron // 2 /// ENST00000373985 // sense // intron // 2 /// ENST00000401604 // sense // intron // 2 /// OTTHUMT00000048102 // sense // intron // 2 /// OTTHUMT00000048103 // sense // intron // 2 /// OTTHUMT00000048105 // sense // intron // 1	---	miRBase
MIMAT0003274_st	hsa-miR-606	0.149866	0.668221	0.992346	0.14494	0.309281	1.04901	0.690092	0.887598	0.37514	MIMAT0003274	miRNA	Homo sapiens	chr10:77312276-77312296 (+)	21	AAACUACUGAAAAUCAAAGAU	---	---	miRBase
MIMAT0023693_st	hsa-miR-6068	0.489453	0.354315	0.992346	1.17124	1.60588	0.338278	2.18541	0.657404	1.74094	MIMAT0023693	miRNA	Homo sapiens	chr1:63792635-63792655 (-)	21	CCUGCGAGUCUCCGGCGGUGG	---	---	miRBase
MIMAT0003275_st	hsa-miR-607	-0.237039	0.467277	0.992346	-0.417471	0.164268	0.464131	-0.215925	-0.107133	-0.177132	MIMAT0003275	miRNA	Homo sapiens	chr10:98588441-98588461 (-)	21	GUUCAAAUCCAGAUCUAUAAC	---	---	miRBase
MIMAT0023701_st	hsa-miR-6076	0.265401	0.573819	0.992346	0.517578	1.3574	0.156082	1.47344	0.21918	1.13464	MIMAT0023701	miRNA	Homo sapiens	chr14:50433117-50433137 (+)	21	AGCAUGACAGAGGAGAGGUGG	---	---	miRBase
MIMAT0023708_st	hsa-miR-6083	0.244254	0.666306	0.992346	2.03757	1.67856	0.582932	2.36981	0.715375	1.94665	MIMAT0023708	miRNA	Homo sapiens	chr3:124093255-124093274 (+)	20	CUUAUAUCAGAGGCUGUGGG	ENST00000240874 // sense // intron // 10 /// ENST00000354186 // sense // intron // 9 /// ENST00000360013 // sense // intron // 10 /// ENST00000439170 // sense // intron // 2 /// ENST00000460856 // sense // intron // 10 /// OTTHUMT00000258842 // sense // intron // 9 /// OTTHUMT00000258843 // sense // intron // 10 /// OTTHUMT00000259129 // sense // intron // 2 /// OTTHUMT00000356282 // sense // int…	---	miRBase
MIMAT0023709_st	hsa-miR-6084	-0.0714582	0.853663	0.994373	0.943846	2.00774	0.901913	1.27043	0.952092	1.41661	MIMAT0023709	miRNA	Homo sapiens	chr1:20960249-20960268 (+)	20	UUCCGCCAGUCGGUGGCCGG	ENST00000321556 // sense // 3UTR // 1 /// OTTHUMT00000007954 // sense // 3UTR // 1	---	miRBase
MIMAT0023710_st	hsa-miR-6085	0.474043	0.152599	0.992346	6.0955	6.69346	6.20438	6.54736	7.04457	6.82355	MIMAT0023710	miRNA	Homo sapiens	chr15:62635310-62635328 (+)	19	AAGGGGCUGGGGGAGCACA	---	---	miRBase
MIMAT0023711_st	hsa-miR-6086	-0.32577	0.420154	0.992346	1.44676	2.2672	1.82831	2.01828	0.916709	1.62995	MIMAT0023711	miRNA	Homo sapiens	chrX:13608412-13608431 (+)	20	GGAGGUUGGGAAGGGCAGAG	ENST00000361306 // sense // intron // 2 /// ENST00000380602 // sense // intron // 2 /// OTTHUMT00000055800 // sense // intron // 2 /// OTTHUMT00000055801 // sense // intron // 2	---	miRBase
MIMAT0023712_st	hsa-miR-6087	0.110409	0.700079	0.992346	9.40034	9.52086	8.97123	9.42661	9.29317	9.50388	MIMAT0023712	miRNA	Homo sapiens	chrX:108297774-108297791 (+)	18	UGAGGCGGGGGGGCGAGC	ENST00000419932 // antisense // exon // 1 /// OTTHUMT00000096568 // antisense // exon // 1	---	miRBase
MIMAT0023713_st	hsa-miR-6088	0.0502139	0.870241	0.998769	8.15679	8.27767	7.63145	8.19532	7.82929	8.19194	MIMAT0023713	miRNA	Homo sapiens	chr19:45939912-45939931 (+)	20	AGAGAUGAAGCGGGGGGGCG	ENST00000423698 // antisense // intron // 1 /// ENST00000592083 // antisense // intron // 2 /// OTTHUMT00000459543 // antisense // intron // 1 /// OTTHUMT00000459554 // antisense // intron // 2	---	miRBase
MIMAT0023714_st	hsa-miR-6089	-0.0109093	0.968864	0.998769	9.29293	9.37893	9.06721	9.37937	8.9713	9.35567	MIMAT0023714	miRNA	Homo sapiens	chrX:2527270-2527293 (+) /// chrY:2477270-2477293 (+)	24	GGAGGCCGGGGUGGGGCGGGGCGG	---	---	miRBase
MIMAT0023715_st	hsa-miR-6090	0.0301477	0.907231	0.998769	9.57922	9.46975	9.36487	9.55953	9.39379	9.55096	MIMAT0023715	miRNA	Homo sapiens	chr11:128392325-128392343 (+)	19	GGGGAGCGAGGGGCGGGGC	ENST00000392668 // antisense // intron // 3 /// OTTHUMT00000386267 // antisense // intron // 3	---	miRBase
MIMAT0003278_st	hsa-miR-610	-0.675676	0.277479	0.992346	5.02182	4.40677	4.05066	4.5286	2.51686	4.40677	MIMAT0003278	miRNA	Homo sapiens	chr11:28078377-28078397 (+)	21	UGAGCUAAAUGUGUGCUGGGA	ENST00000263181 // antisense // intron // 13 /// OTTHUMT00000388328 // antisense // intron // 13	---	miRBase
MIMAT0024597_st	hsa-miR-6124	0.179471	0.786842	0.992346	3.0422	2.91903	1.06971	2.8536	1.55817	3.15759	MIMAT0024597	miRNA	Homo sapiens	chr11:12185239-12185258 (+)	20	GGGAAAAGGAAGGGGGAGGA	ENST00000256194 // sense // intron // 3 /// ENST00000342902 // sense // intron // 2 /// ENST00000379612 // sense // intron // 1 /// ENST00000524685 // sense // intron // 2 /// ENST00000525119 // sense // intron // 2 /// ENST00000527546 // sense // intron // 2 /// ENST00000528931 // sense // intron // 1 /// ENST00000531732 // sense // intron // 3 /// ENST00000532179 // sense // intron // 2 /// ENS…	---	miRBase
MIMAT0024598_st	hsa-miR-6125	0.191367	0.479134	0.992346	6.53292	6.73566	6.71644	6.68188	6.87021	7.00705	MIMAT0024598	miRNA	Homo sapiens	chr12:62654199-62654218 (+)	20	GCGGAAGGCGGAGCGGCGGA	ENST00000280377 // sense // 3UTR // 1 /// ENST00000312635 // sense // 3UTR // 1 /// ENST00000353364 // sense // 3UTR // 1 /// ENST00000393654 // sense // 3UTR // 1 /// ENST00000537297 // sense // exon // 1 /// ENST00000546718 // sense // exon // 1 /// ENST00000548524 // sense // exon // 1 /// ENST00000549237 // sense // 3UTR // 1 /// ENST00000549523 // sense // 3UTR // 1 /// ENST00000550396 // an…	---	miRBase
MIMAT0024599_st	hsa-miR-6126	0.0283286	0.931377	0.998769	9.81064	10.1464	9.20889	9.85575	9.70213	9.69306	MIMAT0024599	miRNA	Homo sapiens	chr16:3535422-3535439 (-)	18	GUGAAGGCCCGGCGGAGA	ENST00000360862 // antisense // exon // 6 /// ENST00000407558 // antisense // exon // 8 /// ENST00000414063 // antisense // exon // 7 /// ENST00000421765 // antisense // exon // 6 /// ENST00000424546 // antisense // exon // 7 /// ENST00000570819 // antisense // exon // 6 /// ENST00000572584 // antisense // exon // 6 /// ENST00000572942 // antisense // exon // 6 /// ENST00000574423 // antisense //…	---	miRBase
MIMAT0024610_st	hsa-miR-6127	-0.10934	0.806187	0.992346	4.63571	4.34116	3.31262	4.20352	3.45456	4.30339	MIMAT0024610	miRNA	Homo sapiens	chr1:22959821-22959839 (-)	19	UGAGGGAGUGGGUGGGAGG	---	---	miRBase
MIMAT0024613_st	hsa-miR-6129	-0.195642	0.625085	0.992346	0.667432	1.50783	0.162222	0.667432	0.391753	0.691377	MIMAT0024613	miRNA	Homo sapiens	chr17:47365778-47365796 (-)	19	UGAGGGAGUUGGGUGUAUA	---	---	miRBase
MIMAT0024615_st	hsa-miR-6131	-0.356537	0.192739	0.992346	0.870486	0.714323	0.901913	0.395316	0.558161	0.463635	MIMAT0024615	miRNA	Homo sapiens	chr5:10478219-10478237 (+)	19	GGCUGGUCAGAUGGGAGUG	---	---	miRBase
MIMAT0024616_st	hsa-miR-6132	-0.0653607	0.884153	0.998769	2.87266	4.03616	3.29864	3.57789	2.64741	3.78608	MIMAT0024616	miRNA	Homo sapiens	chr7:116660285-116660303 (+)	19	AGCAGGGCUGGGGAUUGCA	ENST00000265437 // sense // intron // 1 /// ENST00000323984 // sense // intron // 1 /// ENST00000393443 // sense // 3UTR // 1 /// ENST00000393444 // sense // 3UTR // 1 /// ENST00000393446 // sense // intron // 1 /// ENST00000393447 // sense // 3UTR // 1 /// ENST00000393449 // sense // intron // 1 /// ENST00000393451 // sense // intron // 1 /// ENST00000417919 // sense // intron // 1 /// ENST00000…	---	miRBase
MIMAT0024617_st	hsa-miR-6133	0.686102	0.0882819	0.992346	0.309055	0.797429	0.146797	1.51418	0.567473	1.22993	MIMAT0024617	miRNA	Homo sapiens	chr7:132975705-132975723 (+)	19	UGAGGGAGGAGGUUGGGUA	ENST00000253861 // sense // intron // 3 /// ENST00000393161 // sense // intron // 3 /// ENST00000462055 // sense // intron // 3 /// ENST00000486013 // sense // intron // 3 /// ENST00000492326 // sense // intron // 3 /// ENST00000539845 // sense // intron // 3 /// OTTHUMT00000339182 // sense // intron // 3 /// OTTHUMT00000339183 // sense // intron // 3 /// OTTHUMT00000339184 // sense // intron // …	---	miRBase
MIMAT0003283_st	hsa-miR-615-3p	-0.207992	0.539332	0.992346	1.18813	2.01173	1.32881	1.44511	1.02238	1.4372	MIMAT0003283	miRNA	Homo sapiens	chr12:54427794-54427815 (+)	22	UCCGAGCCUGGGUCUCCCUCUU	ENST00000303406 // sense // intron // 1 /// ENST00000312492 // sense // intron // 1 /// ENST00000512206 // sense // intron // 1 /// ENST00000513209 // sense // intron // 1 /// OTTHUMT00000358947 // sense // intron // 1 /// OTTHUMT00000358948 // sense // intron // 1 /// OTTHUMT00000358949 // sense // intron // 1 /// OTTHUMT00000358964 // sense // intron // 1	---	miRBase
MIMAT0024782_st	hsa-miR-6165	-0.139718	0.848054	0.992346	2.41764	3.67392	0.955088	2.84279	1.37574	2.40897	MIMAT0024782	miRNA	Homo sapiens	chr17:47588187-47588205 (+)	19	CAGCAGGAGGUGAGGGGAG	ENST00000172229 // sense // intron // 4 /// ENST00000504201 // sense // intron // 4 /// ENST00000514506 // antisense // intron // 2 /// OTTHUMT00000365150 // sense // intron // 4 /// OTTHUMT00000365151 // sense // intron // 4 /// OTTHUMT00000365157 // antisense // intron // 2	---	miRBase
MIMAT0003287_st	hsa-miR-618	0.086947	0.805092	0.992346	0.191967	0.283359	0.00767976	-0.311327	0.771815	0.283359	MIMAT0003287	miRNA	Homo sapiens	chr12:81329575-81329597 (-)	23	AAACUCUACUUGUCCUUCUGAGU	ENST00000261203 // sense // intron // 1 /// ENST00000549417 // sense // intron // 1 /// ENST00000552864 // sense // intron // 1 /// OTTHUMT00000407760 // sense // intron // 1 /// OTTHUMT00000407761 // sense // intron // 1 /// OTTHUMT00000407762 // sense // intron // 1	---	miRBase
MIMAT0026622_st	hsa-miR-619-5p	0.0092794	0.972594	0.998769	7.53319	7.47683	7.76874	7.41007	7.7037	7.69283	MIMAT0026622	miRNA	Homo sapiens	chr12:109230738-109230759 (-)	22	GCUGGGAUUACAGGCAUGAGCC	ENST00000326495 // sense // intron // 2 /// ENST00000360239 // sense // intron // 2 /// ENST00000548522 // sense // intron // 2 /// ENST00000551165 // sense // intron // 2 /// OTTHUMT00000403724 // sense // intron // 2 /// OTTHUMT00000403726 // sense // intron // 2 /// OTTHUMT00000403729 // sense // intron // 2	---	miRBase
MIMAT0004809_st	hsa-miR-628-5p	0.683155	0.118461	0.992346	0.0130519	1.15851	1.27124	1.36146	1.50184	1.62896	MIMAT0004809	miRNA	Homo sapiens	chr15:55665189-55665210 (-)	22	AUGCUGACAUAUUUACUAGAGG	ENST00000310958 // sense // intron // 5 /// ENST00000425574 // sense // intron // 5 /// ENST00000442196 // sense // intron // 5 /// ENST00000563171 // sense // intron // 6 /// ENST00000565113 // sense // intron // 12 /// ENST00000568372 // sense // exon // 1 /// ENST00000568808 // sense // intron // 5 /// ENST00000569205 // sense // intron // 5 /// ENST00000570272 // sense // intron // 5 /// OTTH…	---	miRBase
MIMAT0003305_st	hsa-miR-635	0.500112	0.402686	0.992346	-0.00828509	0.681341	1.06039	-0.00354816	1.10766	2.12967	MIMAT0003305	miRNA	Homo sapiens	chr17:66420652-66420674 (-)	23	ACUUGGGCACUGAAACAAUGUCC	ENST00000262139 // sense // intron // 12 /// ENST00000546360 // sense // intron // 11 /// ENST00000585393 // sense // intron // 2 /// ENST00000586515 // antisense // intron // 3 /// ENST00000589316 // sense // intron // 12 /// ENST00000589459 // sense // intron // 11 /// ENST00000590353 // antisense // intron // 1 /// ENST00000591567 // antisense // intron // 1 /// ENST00000592030 // antisense //…	---	miRBase
MIMAT0003308_st	hsa-miR-638	-0.288387	0.394931	0.992346	6.84124	7.37088	7.63237	6.84124	6.82629	7.31179	MIMAT0003308	miRNA	Homo sapiens	chr19:10829095-10829119 (+)	25	AGGGAUCGCGGGCGGGUGGCGGCCU	ENST00000314646 // sense // intron // 1 /// ENST00000355667 // sense // intron // 1 /// ENST00000359692 // sense // intron // 1 /// ENST00000389253 // sense // intron // 1 /// ENST00000408974 // sense // intron // 1 /// ENST00000585892 // sense // intron // 1 /// OTTHUMT00000452590 // sense // intron // 1 /// OTTHUMT00000452591 // sense // intron // 1 /// OTTHUMT00000452592 // sense // intron // …	---	miRBase
MIMAT0020924_st	hsa-miR-642a-3p	0.0529215	0.923528	0.998769	4.55879	3.8184	3.31012	4.57766	2.88887	4.37955	MIMAT0020924	miRNA	Homo sapiens	chr19:46178236-46178257 (+)	22	AGACACAUUUGGAGAGGGAACC	ENST00000263281 // sense // intron // 7 /// ENST00000304207 // sense // intron // 6 /// ENST00000585889 // sense // intron // 7 /// ENST00000588816 // sense // intron // 2 /// ENST00000590918 // sense // intron // 7 /// OTTHUMT00000459640 // sense // intron // 7 /// OTTHUMT00000459641 // sense // intron // 7 /// OTTHUMT00000459642 // sense // intron // 6 /// OTTHUMT00000459643 // sense // intron …	hsa-mir-642a // chr19:46178186-46178282 (+) /// hsa-mir-642b // chr19:46178190-46178266 (-)	miRBase
MIMAT0018444_st	hsa-miR-642b-3p	0.248866	0.516233	0.992346	6.85332	7.46432	6.42682	7.20254	6.7713	7.5172	MIMAT0018444	miRNA	Homo sapiens	chr19:46178199-46178220 (-)	22	AGACACAUUUGGAGAGGGACCC	ENST00000263281 // antisense // intron // 7 /// ENST00000304207 // antisense // intron // 6 /// ENST00000385039 // antisense // exon // 1 /// ENST00000585889 // antisense // intron // 7 /// ENST00000588816 // antisense // intron // 2 /// ENST00000590918 // antisense // intron // 7 /// OTTHUMT00000459640 // antisense // intron // 7 /// OTTHUMT00000459641 // antisense // intron // 7 /// OTTHUMT0000…	hsa-mir-642a // chr19:46178186-46178282 (+) /// hsa-mir-642b // chr19:46178190-46178266 (-)	miRBase
MIMAT0025468_st	hsa-miR-6506-5p	-0.511197	0.0897252	0.992346	0.855279	1.14895	0.710674	0.463635	0.341453	0.376226	MIMAT0025468	miRNA	Homo sapiens	chr16:15704929-15704951 (-)	23	ACUGGGAUGUCACUGAAUAUGGU	ENST00000344181 // sense // exon // 16 /// ENST00000396368 // sense // exon // 19 /// ENST00000540441 // sense // exon // 18 /// ENST00000548025 // sense // exon // 19 /// ENST00000551742 // sense // exon // 19 /// ENST00000552553 // sense // 3UTR // 17 /// ENST00000565857 // antisense // intron // 4 /// ENST00000602337 // sense // exon // 19 /// OTTHUMT00000252131 // sense // exon // 19 /// OTTH…	---	miRBase
MIMAT0025474_st	hsa-miR-6509-5p	0.0118504	0.988677	0.998769	0.531802	2.0578	3.21099	2.90474	0.57844	2.35297	MIMAT0025474	miRNA	Homo sapiens	chr7:134891796-134891816 (-)	21	AUUAGGUAGUGGCAGUGGAAC	ENST00000344400 // sense // intron // 4 /// ENST00000354475 // sense // intron // 4 /// ENST00000423565 // sense // intron // 4 /// ENST00000466182 // sense // intron // 4 /// ENST00000485942 // sense // intron // 1 /// OTTHUMT00000340019 // sense // intron // 4 /// OTTHUMT00000340020 // sense // intron // 4 /// OTTHUMT00000340021 // sense // intron // 4 /// OTTHUMT00000340022 // sense // intron …	---	miRBase
MIMAT0025476_st	hsa-miR-6510-5p	-0.215263	0.633607	0.992346	3.22528	4.15056	3.14007	3.52578	2.57465	3.76969	MIMAT0025476	miRNA	Homo sapiens	chr17:39673446-39673467 (-)	22	CAGCAGGGGAGAGAGAGGAGUC	ENST00000254043 // sense // exon // 2 /// ENST00000393974 // sense // intron // 1 /// ENST00000393976 // sense // exon // 4 /// ENST00000393981 // sense // intron // 1 /// ENST00000458290 // sense // intron // 2 /// ENST00000463447 // sense // exon // 3 /// ENST00000470004 // sense // 3UTR // 4 /// ENST00000474031 // sense // intron // 2 /// ENST00000497016 // sense // exon // 4 /// OTTHUMT000002…	---	miRBase
MIMAT0025478_st	hsa-miR-6511a-5p	0.02916	0.946923	0.998769	0.872988	1.61704	2.03857	1.21277	1.21277	2.19055	MIMAT0025478	miRNA	Homo sapiens	chr16:15019798-15019820 (+) /// chr16:16418449-16418471 (+) /// chr16:16462737-16462759 (+) /// chr16:18437910-18437932 (-)	23	CAGGCAGAAGUGGGGCUGACAGG	ENST00000472413 // sense // intron // 5 /// ENST00000534164 // sense // intron // 15 /// ENST00000545628 // sense // intron // 11 /// OTTHUMT00000207327 // sense // intron // 5 /// OTTHUMT00000389063 // sense // intron // 15 /// ENST00000458669 // sense // intron // 16 /// ENST00000536260 // sense // intron // 11 /// ENST00000537112 // sense // intron // 5 /// ENST00000541915 // sense // intron /…	hsa-mir-6511a-1 // chr16:15019794-15019860 (+) /// hsa-mir-6770-1 // chr16:15024677-15024736 (+) /// hsa-mir-6511a-2 // chr16:16418445-16418511 (+) /// hsa-mir-6770-2 // chr16:16423162-16423221 (+)	miRBase
MIMAT0025847_st	hsa-miR-6511b-5p	0.66262	0.248009	0.992346	2.91325	3.70359	4.89592	3.98712	4.91872	4.59477	MIMAT0025847	miRNA	Homo sapiens	chr16:2156721-2156744 (-)	24	CUGCAGGCAGAAGUGGGGCUGACA	ENST00000262304 // sense // exon // 18 /// ENST00000415938 // sense // exon // 4 /// ENST00000423118 // sense // exon // 18 /// ENST00000483024 // sense // exon // 5 /// ENST00000483558 // sense // exon // 3 /// ENST00000483731 // sense // exon // 6 /// ENST00000486339 // sense // exon // 2 /// ENST00000487932 // sense // exon // 4 /// ENST00000496574 // sense // exon // 2 /// ENST00000565639 // …	---	miRBase
MIMAT0025486_st	hsa-miR-6515-5p	0.286496	0.689781	0.992346	2.37409	2.56584	0.780532	3.03578	0.867747	2.67641	MIMAT0025486	miRNA	Homo sapiens	chr19:13051300-13051320 (+)	21	UUGGAGGGUGUGGAAGACAUC	ENST00000316448 // sense // intron // 5 /// ENST00000586760 // sense // intron // 1 /// ENST00000588454 // sense // intron // 4 /// OTTHUMT00000451952 // sense // intron // 5 /// OTTHUMT00000451954 // sense // intron // 4 /// OTTHUMT00000451955 // sense // intron // 1	---	miRBase
MIMAT0030417_st	hsa-miR-6516-5p	-0.0098831	0.985193	0.998769	0.210146	0.829031	1.95632	1.66574	0.769723	0.530389	MIMAT0030417	miRNA	Homo sapiens	chr17:75085510-75085531 (+)	22	UUUGCAGUAACAGGUGUGAGCA	ENST00000366365 // sense // exon // 2 /// ENST00000392476 // sense // intron // 2 /// ENST00000430767 // sense // intron // 1 /// ENST00000434411 // sense // intron // 2 /// ENST00000515981 // sense // exon // 1 /// ENST00000561633 // sense // intron // 2 /// ENST00000561721 // sense // intron // 2 /// ENST00000564414 // sense // intron // 2 /// ENST00000564509 // sense // intron // 1 /// ENST000…	---	miRBase
MIMAT0022709_st	hsa-miR-652-5p	0.52324	0.45603	0.992346	2.55513	3.67902	1.34502	2.99945	2.2027	3.94674	MIMAT0022709	miRNA	Homo sapiens	chrX:109298577-109298601 (+)	25	CAACCCUAGGAGAGGGUGCCAUUCA	ENST00000288381 // sense // intron // 2 /// ENST00000372068 // sense // intron // 2 /// ENST00000372072 // sense // intron // 1 /// ENST00000372073 // sense // intron // 2 /// ENST00000471255 // sense // intron // 2 /// OTTHUMT00000057896 // sense // intron // 2 /// OTTHUMT00000057898 // sense // intron // 2 /// OTTHUMT00000057899 // sense // intron // 2	---	miRBase
MIMAT0026627_st	hsa-miR-656-5p	-0.33578	0.639796	0.992346	3.53683	2.96352	1.54505	3.03707	1.05812	2.94286	MIMAT0026627	miRNA	Homo sapiens	chr14:101533068-101533088 (+)	21	AGGUUGCCUGUGAGGUGUUCA	---	hsa-mir-154 // chr14:101526092-101526175 (+) /// hsa-mir-369 // chr14:101531935-101532004 (+) /// hsa-mir-377 // chr14:101528387-101528455 (+) /// hsa-mir-409 // chr14:101531637-101531715 (+) /// hsa-mir-412 // chr14:101531784-101531874 (+) /// hsa-mir-410 // chr14:101532249-101532328 (+) /// hsa-mir-496 // chr14:101526910-101527011 (+) /// hsa-mir-656 // chr14:101533061-101533138 (+) /// hsa-mir…	miRBase
MIMAT0003337_st	hsa-miR-659-3p	0.940385	0.120434	0.992346	0.172098	2.16379	0.901913	2.24753	1.44789	2.36354	MIMAT0003337	miRNA	Homo sapiens	chr22:38243700-38243721 (-)	22	CUUGGUUCAGGGAGGGUCCCCA	---	hsa-mir-658 // chr22:38240279-38240378 (-) /// hsa-mir-659 // chr22:38243685-38243781 (-)	miRBase
MIMAT0022711_st	hsa-miR-660-3p	-0.409293	0.462017	0.992346	1.81309	2.70041	2.57465	2.64755	0.816485	2.39623	MIMAT0022711	miRNA	Homo sapiens	chrX:49777900-49777920 (+)	21	ACCUCCUGUGUGCAUGGAUUA	ENST00000376088 // sense // intron // 3 /// ENST00000376091 // sense // intron // 3 /// ENST00000482218 // sense // intron // 3 /// OTTHUMT00000056542 // sense // intron // 3 /// OTTHUMT00000056543 // sense // intron // 3 /// OTTHUMT00000109349 // sense // intron // 3	hsa-mir-188 // chrX:49768109-49768194 (+) /// hsa-mir-362 // chrX:49773572-49773636 (+) /// hsa-mir-500a // chrX:49773039-49773122 (+) /// hsa-mir-501 // chrX:49774330-49774413 (+) /// hsa-mir-502 // chrX:49779206-49779291 (+) /// hsa-mir-660 // chrX:49777849-49777945 (+) /// hsa-mir-500b // chrX:49775280-49775358 (+)	miRBase
MIMAT0003338_st	hsa-miR-660-5p	0.43432	0.190559	0.992346	0.103082	0.103082	0.463635	0.256853	0.973139	0.742766	MIMAT0003338	miRNA	Homo sapiens	chrX:49777864-49777885 (+)	22	UACCCAUUGCAUAUCGGAGUUG	ENST00000376088 // sense // intron // 3 /// ENST00000376091 // sense // intron // 3 /// ENST00000482218 // sense // intron // 3 /// OTTHUMT00000056542 // sense // intron // 3 /// OTTHUMT00000056543 // sense // intron // 3 /// OTTHUMT00000109349 // sense // intron // 3	hsa-mir-188 // chrX:49768109-49768194 (+) /// hsa-mir-362 // chrX:49773572-49773636 (+) /// hsa-mir-500a // chrX:49773039-49773122 (+) /// hsa-mir-501 // chrX:49774330-49774413 (+) /// hsa-mir-502 // chrX:49779206-49779291 (+) /// hsa-mir-660 // chrX:49777849-49777945 (+) /// hsa-mir-500b // chrX:49775280-49775358 (+)	miRBase
MIMAT0003326_st	hsa-miR-663a	0.148274	0.630737	0.992346	6.38054	6.43691	6.74374	6.2898	6.97055	6.74567	MIMAT0003326	miRNA	Homo sapiens	chr20:26188879-26188900 (-)	22	AGGCGGGGCGCCGCGGGACCGC	ENST00000427348 // sense // intron // 1 /// ENST00000432499 // sense // intron // 1 /// ENST00000594130 // sense // intron // 1 /// ENST00000594135 // sense // intron // 1 /// ENST00000594150 // sense // intron // 1 /// ENST00000596058 // sense // intron // 1 /// ENST00000596111 // sense // exon // 1 /// ENST00000596223 // sense // exon // 1 /// ENST00000596767 // sense // intron // 1 /// ENST000…	---	miRBase
MIMAT0004952_st	hsa-miR-665	0.175803	0.63929	0.992346	6.22754	5.4674	5.2698	6.06063	5.40646	6.02505	MIMAT0004952	miRNA	Homo sapiens	chr14:101341412-101341431 (+)	20	ACCAGGAGGCUGAGGCCCCU	---	hsa-mir-127 // chr14:101349316-101349412 (+) /// hsa-mir-136 // chr14:101351039-101351120 (+) /// hsa-mir-337 // chr14:101340830-101340922 (+) /// hsa-mir-431 // chr14:101347344-101347457 (+) /// hsa-mir-433 // chr14:101348223-101348315 (+) /// hsa-mir-493 // chr14:101335397-101335485 (+) /// hsa-mir-432 // chr14:101350820-101350913 (+) /// hsa-mir-665 // chr14:101341370-101341441 (+)	miRBase
MIMAT0026636_st	hsa-miR-668-5p	-0.24343	0.698442	0.992346	2.43255	3.55101	4.37051	3.74926	3.66512	2.20939	MIMAT0026636	miRNA	Homo sapiens	chr14:101521601-101521619 (+)	19	UGCGCCUCGGGUGAGCAUG	---	hsa-mir-134 // chr14:101521024-101521096 (+) /// hsa-mir-154 // chr14:101526092-101526175 (+) /// hsa-mir-377 // chr14:101528387-101528455 (+) /// hsa-mir-381 // chr14:101512257-101512331 (+) /// hsa-mir-382 // chr14:101520643-101520718 (+) /// hsa-mir-485 // chr14:101521756-101521828 (+) /// hsa-mir-487a // chr14:101518783-101518862 (+) /// hsa-mir-496 // chr14:101526910-101527011 (+) /// hsa-mi…	miRBase
MIMAT0010357_st	hsa-miR-670-5p	-0.430615	0.694821	0.992346	3.6638	3.13964	0.876651	4.00277	0.184672	2.2008	MIMAT0010357	miRNA	Homo sapiens	chr11:43581225-43581244 (+)	20	GUCCCUGAGUGUAUGUGGUG	ENST00000446181 // sense // intron // 1 /// ENST00000526615 // sense // intron // 2 /// OTTHUMT00000337474 // sense // intron // 1 /// OTTHUMT00000389683 // sense // intron // 2	---	miRBase
MIMAT0003880_st	hsa-miR-671-5p	0.827766	0.101431	0.992346	2.04657	2.36488	0.933729	2.87356	2.10078	2.85413	MIMAT0003880	miRNA	Homo sapiens	chr7:150935535-150935557 (+)	23	AGGAAGCCCUGGAGGGGCUGGAG	ENST00000035307 // sense // 3UTR // 4 /// ENST00000495645 // sense // 3UTR // 5 /// OTTHUMT00000348648 // sense // 3UTR // 4 /// OTTHUMT00000348842 // sense // 3UTR // 5	---	miRBase
MIMAT0025841_st	hsa-miR-6715a-3p	0.0477807	0.914626	0.998769	2.66574	2.33752	1.90479	3.16551	2.18305	1.70285	MIMAT0025841	miRNA	Homo sapiens	chr10:114059418-114059438 (+)	21	CCAAACCAGUCGUGCCUGUGG	ENST00000369422 // sense // intron // 8 /// ENST00000494328 // sense // intron // 2 /// OTTHUMT00000050381 // sense // intron // 8 /// OTTHUMT00000050382 // sense // intron // 2	hsa-mir-6715a // chr10:114059370-114059448 (+) /// hsa-mir-6715b // chr10:114059370-114059446 (-)	miRBase
MIMAT0025843_st	hsa-miR-6715b-3p	-0.0104512	0.987565	0.998769	2.87349	3.59241	1.23962	3.23486	1.76728	2.67203	MIMAT0025843	miRNA	Homo sapiens	chr10:114059380-114059401 (-)	22	CUCAAACCGGCUGUGCCUGUGG	ENST00000369422 // antisense // intron // 8 /// ENST00000494328 // antisense // intron // 2 /// OTTHUMT00000050381 // antisense // intron // 8 /// OTTHUMT00000050382 // antisense // intron // 2	hsa-mir-6715a // chr10:114059370-114059448 (+) /// hsa-mir-6715b // chr10:114059370-114059446 (-)	miRBase
MIMAT0025845_st	hsa-miR-6716-3p	-0.145722	0.745642	0.992346	2.78633	1.71068	1.34146	2.21034	1.74158	1.44939	MIMAT0025845	miRNA	Homo sapiens	chr11:118514766-118514787 (+)	22	UCCGAACUCUCCAUUCCUCUGC	ENST00000356063 // sense // 3UTR // 14 /// ENST00000361417 // sense // 3UTR // 16 /// ENST00000392852 // sense // exon // 4 /// ENST00000524713 // sense // 3UTR // 4 /// ENST00000525698 // sense // exon // 8 /// ENST00000526826 // sense // exon // 2 /// ENST00000527898 // sense // 3UTR // 4 /// ENST00000528594 // sense // 3UTR // 14 /// ENST00000528875 // sense // intron // 3 /// ENST00000530994 …	---	miRBase
MIMAT0025844_st	hsa-miR-6716-5p	0.250523	0.710955	0.992346	2.30694	4.40892	2.87892	3.9766	2.39316	3.9766	MIMAT0025844	miRNA	Homo sapiens	chr11:118514733-118514752 (+)	20	UGGGAAUGGGGGUAAGGGCC	ENST00000356063 // sense // 3UTR // 14 /// ENST00000361417 // sense // 3UTR // 16 /// ENST00000392852 // sense // exon // 4 /// ENST00000524713 // sense // 3UTR // 4 /// ENST00000525698 // sense // exon // 8 /// ENST00000526826 // sense // exon // 2 /// ENST00000527898 // sense // 3UTR // 4 /// ENST00000528594 // sense // 3UTR // 14 /// ENST00000528875 // sense // intron // 3 /// ENST00000530994 …	---	miRBase
MIMAT0025852_st	hsa-miR-6721-5p	0.0566733	0.886962	0.998769	0.415332	1.668	1.26226	1.40255	1.274	0.839058	MIMAT0025852	miRNA	Homo sapiens	chr6:32137861-32137883 (-)	23	UGGGCAGGGGCUUAUUGUAGGAG	ENST00000336984 // sense // exon // 6 /// ENST00000375104 // sense // exon // 6 /// ENST00000375107 // sense // exon // 6 /// ENST00000395496 // sense // exon // 6 /// ENST00000395497 // sense // exon // 6 /// ENST00000395499 // sense // exon // 6 /// ENST00000412465 // sense // exon // 5 /// ENST00000422437 // antisense // intron // 19 /// ENST00000490711 // sense // exon // 4 /// OTTHUMT0000007…	hsa-mir-6721 // chr6:32137807-32137893 (-) /// hsa-mir-6833 // chr6:32147593-32147653 (+)	miRBase
MIMAT0025854_st	hsa-miR-6722-3p	0.111878	0.747767	0.992346	5.14318	5.25968	4.66447	5.42957	4.62462	5.34877	MIMAT0025854	miRNA	Homo sapiens	chr9:139641355-139641376 (-)	22	UGCAGGGGUCGGGUGGGCCAGG	ENST00000341206 // sense // intron // 2 /// ENST00000435202 // sense // intron // 2 /// OTTHUMT00000055104 // sense // intron // 2 /// OTTHUMT00000055107 // sense // intron // 2	---	miRBase
MIMAT0025856_st	hsa-miR-6724-5p	0.502583	0.129897	0.992346	6.58465	6.353	5.84332	6.70801	6.69203	6.88868	MIMAT0025856	miRNA	Homo sapiens	---	23	CUGGGCCCGCGGCGGGCGUGGGG	---	---	miRBase
MIMAT0027353_st	hsa-miR-6726-5p	0.166811	0.651048	0.992346	2.60298	2.25996	1.81011	2.29896	1.98624	2.88828	MIMAT0027353	miRNA	Homo sapiens	chr1:1231525-1231545 (-)	21	CGGGAGCUGGGGUCUGCAGGU	ENST00000353662 // sense // intron // 16 /// ENST00000354700 // sense // intron // 16 /// ENST00000467278 // sense // intron // 6 /// ENST00000492936 // sense // intron // 15 /// OTTHUMT00000006366 // sense // intron // 16 /// OTTHUMT00000006368 // sense // intron // 6 /// OTTHUMT00000006369 // sense // intron // 15	---	miRBase
MIMAT0027355_st	hsa-miR-6727-5p	0.277423	0.348005	0.992346	6.43122	6.90845	6.75603	6.76032	7.14887	7.01878	MIMAT0027355	miRNA	Homo sapiens	chr1:1247919-1247941 (-)	23	CUCGGGGCAGGCGGCUGGGAGCG	ENST00000323275 // sense // intron // 12 /// ENST00000411962 // sense // intron // 11 /// ENST00000419704 // sense // intron // 11 /// ENST00000421495 // sense // intron // 10 /// ENST00000435064 // sense // intron // 13 /// ENST00000450926 // sense // intron // 13 /// ENST00000458452 // sense // intron // 15 /// ENST00000461514 // sense // exon // 4 /// ENST00000462432 // sense // intron // 10 /…	---	miRBase
MIMAT0027357_st	hsa-miR-6728-5p	-0.211636	0.490555	0.992346	0.884099	1.03546	1.34759	1.11143	0.540091	0.980727	MIMAT0027357	miRNA	Homo sapiens	chr1:8926622-8926644 (-)	23	UUGGGAUGGUAGGACCAGAGGGG	ENST00000234590 // sense // intron // 6 /// ENST00000464920 // sense // intron // 3 /// ENST00000497492 // sense // intron // 6 /// OTTHUMT00000004945 // sense // intron // 6 /// OTTHUMT00000004946 // sense // intron // 3 /// OTTHUMT00000004948 // sense // intron // 6	---	miRBase
MIMAT0027359_st	hsa-miR-6729-5p	0.307838	0.268708	0.992346	6.77859	6.84859	6.8779	6.91787	7.23453	7.27619	MIMAT0027359	miRNA	Homo sapiens	chr1:12089220-12089241 (+)	22	UGGGCGAGGGCGGCUGAGCGGC	ENST00000235332 // sense // intron // 5 /// ENST00000436478 // sense // intron // 5 /// ENST00000460823 // sense // intron // 1 /// ENST00000466860 // sense // intron // 3 /// ENST00000478749 // sense // intron // 4 /// ENST00000492256 // sense // intron // 1 /// ENST00000498685 // sense // intron // 2 /// OTTHUMT00000006941 // sense // intron // 5 /// OTTHUMT00000006942 // sense // intron // 2 /…	---	miRBase
MIMAT0027361_st	hsa-miR-6730-5p	-0.346496	0.255764	0.992346	0.304251	0.901913	0.65401	0.373933	0.343672	0.103082	MIMAT0027361	miRNA	Homo sapiens	chr1:12639024-12639046 (-)	23	AGAAAGGUGGAGGGGUUGUCAGA	ENST00000376223 // sense // intron // 3 /// ENST00000430996 // sense // intron // 3 /// ENST00000464917 // sense // intron // 2 /// OTTHUMT00000005318 // sense // intron // 3 /// OTTHUMT00000005319 // sense // intron // 2 /// OTTHUMT00000005321 // sense // intron // 3	---	miRBase
MIMAT0027364_st	hsa-miR-6731-3p	0.156109	0.625743	0.992346	0.311592	0.564367	0.597741	1.09893	0.555698	0.287403	MIMAT0027364	miRNA	Homo sapiens	chr1:25245836-25245856 (-)	21	UCUAUUCCCCACUCUCCCCAG	ENST00000308873 // sense // intron // 2 /// ENST00000338888 // sense // intron // 4 /// ENST00000399916 // sense // intron // 3 /// ENST00000496967 // sense // intron // 2 /// ENST00000540420 // sense // intron // 2 /// OTTHUMT00000009284 // sense // intron // 2 /// OTTHUMT00000009285 // sense // intron // 4 /// OTTHUMT00000009287 // sense // intron // 2	---	miRBase
MIMAT0027365_st	hsa-miR-6732-5p	-0.17757	0.499697	0.992346	8.42386	8.64715	8.55435	8.35801	8.27687	8.45776	MIMAT0027365	miRNA	Homo sapiens	chr1:37945836-37945855 (+)	20	UAGGGGGUGGCAGGCUGGCC	ENST00000373087 // sense // intron // 2 /// ENST00000472312 // sense // exon // 1 /// OTTHUMT00000012154 // sense // intron // 2 /// OTTHUMT00000012157 // sense // exon // 1	---	miRBase
MIMAT0027369_st	hsa-miR-6734-5p	-0.266638	0.359988	0.992346	0.583409	0.901913	0.555277	0.58802	0.160244	0.492422	MIMAT0027369	miRNA	Homo sapiens	chr1:43830359-43830381 (-)	23	UUGAGGGGAGAAUGAGGUGGAGA	ENST00000372458 // sense // intron // 5 /// ENST00000413844 // sense // intron // 4 /// ENST00000464204 // sense // intron // 5 /// ENST00000465321 // sense // intron // 6 /// ENST00000468865 // sense // intron // 3 /// ENST00000470769 // sense // intron // 5 /// ENST00000470968 // sense // intron // 5 /// ENST00000478481 // sense // intron // 2 /// ENST00000479439 // sense // intron // 5 /// ENS…	---	miRBase
MIMAT0027371_st	hsa-miR-6735-5p	0.371264	0.314361	0.992346	1.83146	2.57207	2.87356	2.56584	2.87356	2.95148	MIMAT0027371	miRNA	Homo sapiens	chr1:43914215-43914239 (+)	25	CAGGGCAGAGGGCACAGGAAUCUGA	ENST00000372442 // sense // intron // 54 /// ENST00000396885 // antisense // exon // 1 /// ENST00000460536 // sense // intron // 7 /// ENST00000562955 // sense // intron // 68 /// OTTHUMT00000019517 // sense // intron // 68 /// OTTHUMT00000019519 // sense // intron // 7 /// OTTHUMT00000019521 // antisense // exon // 1	---	miRBase
MIMAT0027373_st	hsa-miR-6736-5p	-0.72663	0.0771814	0.992346	3.0233	3.70685	3.91608	2.99449	2.37803	3.09382	MIMAT0027373	miRNA	Homo sapiens	chr1:145584428-145584448 (+)	21	CUGGGUGAGGGCAUCUGUGGU	ENST00000369298 // sense // intron // 12 /// ENST00000393045 // sense // intron // 11 /// ENST00000472114 // sense // intron // 2 /// ENST00000475261 // sense // intron // 4 /// OTTHUMT00000038533 // sense // intron // 11 /// OTTHUMT00000038534 // sense // intron // 12 /// OTTHUMT00000038535 // sense // intron // 2 /// OTTHUMT00000038536 // sense // intron // 4	---	miRBase
MIMAT0027375_st	hsa-miR-6737-5p	-0.193013	0.661421	0.992346	2.15004	1.51269	0.705833	1.2842	0.876299	1.62902	MIMAT0027375	miRNA	Homo sapiens	chr1:153934871-153934891 (-)	21	UUGGGGUGGUCGGCCCUGGAG	ENST00000310483 // sense // intron // 3 /// ENST00000356205 // sense // intron // 2 /// ENST00000368621 // sense // intron // 2 /// ENST00000368623 // sense // intron // 1 /// ENST00000413622 // sense // intron // 3 /// ENST00000417348 // sense // intron // 2 /// ENST00000429040 // sense // intron // 2 /// ENST00000461071 // sense // intron // 2 /// ENST00000537590 // sense // intron // 2 /// OTT…	---	miRBase
MIMAT0027379_st	hsa-miR-6739-5p	0.394134	0.212017	0.992346	-0.212164	0.0635154	0.0547281	0.382522	0.684829	0.0211308	MIMAT0027379	miRNA	Homo sapiens	chr1:201832506-201832527 (+)	22	UGGGAAAGAGAAAGAACAAGUA	ENST00000361565 // sense // intron // 13 /// OTTHUMT00000087088 // sense // intron // 13	---	miRBase
MIMAT0027381_st	hsa-miR-6740-5p	0.525305	0.12114	0.992346	0.495463	1.09096	0.463635	1.14736	1.02791	1.4507	MIMAT0027381	miRNA	Homo sapiens	chr1:201972257-201972278 (+)	22	AGUUUGGGAUGGAGAGAGGAGA	ENST00000295640 // sense // intron // 8 /// ENST00000367286 // sense // intron // 7 /// ENST00000419190 // antisense // intron // 1 /// ENST00000464707 // sense // intron // 2 /// ENST00000471105 // sense // intron // 7 /// ENST00000478617 // sense // intron // 7 /// ENST00000479531 // sense // intron // 1 /// ENST00000492849 // sense // intron // 7 /// OTTHUMT00000087344 // antisense // intron /…	---	miRBase
MIMAT0027383_st	hsa-miR-6741-5p	-0.146695	0.726712	0.992346	4.84736	4.7578	4.18814	4.79711	3.67769	4.87842	MIMAT0027383	miRNA	Homo sapiens	chr1:226109816-226109837 (-)	22	GUGGGUGCUGGUGGGAGCCGUG	ENST00000343818 // sense // intron // 3 /// ENST00000432920 // sense // intron // 3 /// ENST00000446534 // sense // intron // 1 /// ENST00000472798 // sense // intron // 2 /// ENST00000478402 // sense // exon // 2 /// ENST00000489681 // sense // intron // 3 /// OTTHUMT00000091314 // sense // intron // 3 /// OTTHUMT00000091315 // sense // exon // 2 /// OTTHUMT00000091319 // sense // intron // 3 //…	---	miRBase
MIMAT0027387_st	hsa-miR-6743-5p	0.0149789	0.960589	0.998769	5.29761	5.75612	5.39508	5.53092	5.18061	5.78221	MIMAT0027387	miRNA	Homo sapiens	chr11:209341-209362 (+)	22	AAGGGGCAGGGACGGGUGGCCC	ENST00000325207 // sense // intron // 2 /// ENST00000526104 // sense // intron // 2 /// ENST00000526982 // sense // intron // 2 /// ENST00000527468 // sense // intron // 1 /// ENST00000527696 // sense // 3UTR // 1 /// ENST00000528357 // sense // intron // 2 /// ENST00000530889 // sense // intron // 2 /// ENST00000532373 // sense // exon // 2 /// OTTHUMT00000239282 // sense // intron // 2 /// OTTH…	---	miRBase
MIMAT0027392_st	hsa-miR-6746-5p	0.732004	0.116594	0.992346	2.98918	3.3171	2.11245	3.62855	3.02423	3.96197	MIMAT0027392	miRNA	Homo sapiens	chr11:61645724-61645745 (-)	22	CCGGGAGAAGGAGGUGGCCUGG	ENST00000278829 // sense // intron // 5 /// ENST00000414624 // sense // intron // 5 /// ENST00000525588 // sense // intron // 5 /// ENST00000526294 // sense // intron // 3 /// ENST00000527379 // sense // intron // 1 /// ENST00000527697 // sense // intron // 5 /// ENST00000529404 // sense // intron // 4 /// ENST00000531956 // sense // intron // 5 /// ENST00000533676 // sense // intron // 4 /// ENS…	---	miRBase
MIMAT0027396_st	hsa-miR-6748-5p	0.00452688	0.987631	0.998769	1.81243	2.12388	1.96815	2.27685	1.67303	1.96815	MIMAT0027396	miRNA	Homo sapiens	chr11:62557292-62557313 (+)	22	UGUGGGUGGGAAGGACUGGAUU	ENST00000333449 // sense // intron // 4 /// ENST00000525631 // antisense // intron // 1 /// ENST00000526546 // sense // exon // 3 /// ENST00000527073 // antisense // intron // 1 /// ENST00000528367 // antisense // intron // 1 /// ENST00000532345 // sense // intron // 1 /// ENST00000532586 // sense // exon // 4 /// ENST00000533861 // sense // intron // 3 /// OTTHUMT00000395360 // sense // exon // …	hsa-mir-6514 // chr11:62560174-62560243 (-) /// hsa-mir-6748 // chr11:62557287-62557357 (+)	miRBase
MIMAT0027398_st	hsa-miR-6749-5p	-0.0514496	0.87188	0.998769	5.28437	5.76147	5.05058	5.29165	5.06387	5.58656	MIMAT0027398	miRNA	Homo sapiens	chr11:64669901-64669922 (-)	22	UCGGGCCUGGGGUUGGGGGAGC	ENST00000377264 // sense // intron // 27 /// ENST00000418259 // sense // intron // 23 /// ENST00000421419 // sense // intron // 27 /// OTTHUMT00000143224 // sense // intron // 27 /// OTTHUMT00000143227 // sense // intron // 23	hsa-mir-6749 // chr11:64669859-64669927 (-) /// hsa-mir-6750 // chr11:64665835-64665909 (-)	miRBase
MIMAT0004284_st	hsa-miR-675-5p	-0.25487	0.719864	0.992346	0.460351	3.04496	0.901913	1.47344	0.534332	1.63484	MIMAT0004284	miRNA	Homo sapiens	chr11:2018030-2018052 (-)	23	UGGUGCGGAGAGGGCCCACAGUG	ENST00000390168 // sense // exon // 1 /// ENST00000411754 // sense // exon // 2 /// ENST00000411861 // sense // exon // 1 /// ENST00000412788 // sense // exon // 1 /// ENST00000414790 // sense // exon // 1 /// ENST00000417089 // sense // exon // 1 /// ENST00000422826 // sense // exon // 1 /// ENST00000428066 // sense // intron // 1 /// ENST00000431095 // sense // exon // 2 /// ENST00000439725 // …	---	miRBase
MIMAT0027400_st	hsa-miR-6750-5p	0.0421383	0.924299	0.998769	3.88053	4.80394	4.89735	3.95694	5.18265	4.56865	MIMAT0027400	miRNA	Homo sapiens	chr11:64665881-64665904 (-)	24	CAGGGAACAGCUGGGUGAGCUGCU	ENST00000377264 // sense // intron // 32 /// ENST00000418259 // sense // intron // 28 /// ENST00000421419 // sense // intron // 32 /// OTTHUMT00000143224 // sense // intron // 32 /// OTTHUMT00000143227 // sense // intron // 28	hsa-mir-192 // chr11:64658609-64658718 (-) /// hsa-mir-194-2 // chr11:64658827-64658911 (-) /// hsa-mir-6749 // chr11:64669859-64669927 (-) /// hsa-mir-6750 // chr11:64665835-64665909 (-)	miRBase
MIMAT0027402_st	hsa-miR-6751-5p	-0.0976185	0.900623	0.998769	3.38421	3.9008	1.16175	3.28812	1.74575	3.12004	MIMAT0027402	miRNA	Homo sapiens	chr11:64897423-64897445 (-)	23	UUGGGGGUGAGGUUGGUGUCUGG	ENST00000294256 // sense // intron // 13 /// ENST00000307289 // sense // intron // 11 /// ENST00000377190 // sense // intron // 13 /// ENST00000449943 // sense // intron // 11 /// ENST00000526060 // sense // intron // 13 /// ENST00000527765 // sense // intron // 2 /// ENST00000530451 // sense // exon // 1 /// OTTHUMT00000385272 // sense // exon // 1 /// OTTHUMT00000385273 // sense // intron // 13…	---	miRBase
MIMAT0027404_st	hsa-miR-6752-5p	-0.180042	0.584217	0.992346	6.29222	6.94845	6.29106	6.51089	6.00738	6.47333	MIMAT0027404	miRNA	Homo sapiens	chr11:67257721-67257742 (+)	22	GGGGGGUGUGGAGCCAGGGGGC	ENST00000279146 // sense // intron // 4 /// ENST00000525341 // sense // intron // 2 /// ENST00000528641 // sense // intron // 3 /// OTTHUMT00000395515 // sense // intron // 3 /// OTTHUMT00000395516 // sense // intron // 4 /// OTTHUMT00000395519 // sense // intron // 2	---	miRBase
MIMAT0027407_st	hsa-miR-6753-3p	-0.737468	0.271063	0.992346	1.89018	3.71479	2.85468	1.96056	1.1644	3.12229	MIMAT0027407	miRNA	Homo sapiens	chr11:67812399-67812420 (+)	22	UGGUCUGUCUCUGCCCUGGCAC	ENST00000265686 // sense // intron // 9 /// ENST00000525724 // sense // intron // 2 /// ENST00000528981 // sense // intron // 1 /// ENST00000529364 // sense // intron // 4 /// ENST00000532635 // sense // intron // 4 /// ENST00000533005 // sense // intron // 1 /// OTTHUMT00000394305 // sense // intron // 9 /// OTTHUMT00000394310 // sense // intron // 2 /// OTTHUMT00000394311 // sense // intron // …	---	miRBase
MIMAT0027406_st	hsa-miR-6753-5p	0.239888	0.639593	0.992346	1.16672	2.88737	2.87356	2.35766	2.57465	2.71501	MIMAT0027406	miRNA	Homo sapiens	chr11:67812261-67812282 (+)	22	CACCAGGGCAGAGCAGGGCUGA	ENST00000265686 // sense // intron // 9 /// ENST00000525724 // sense // intron // 2 /// ENST00000528981 // sense // intron // 1 /// ENST00000529364 // sense // intron // 4 /// ENST00000532635 // sense // intron // 4 /// ENST00000533005 // sense // intron // 1 /// OTTHUMT00000394305 // sense // intron // 9 /// OTTHUMT00000394310 // sense // intron // 2 /// OTTHUMT00000394311 // sense // intron // …	---	miRBase
MIMAT0027409_st	hsa-miR-6754-3p	-0.37798	0.518564	0.992346	3.4219	3.33807	1.8243	3.3658	1.97944	2.10509	MIMAT0027409	miRNA	Homo sapiens	chr11:71184592-71184613 (+)	22	UCUUCACCUGCCUCUGCCUGCA	ENST00000319023 // sense // intron // 7 /// ENST00000525200 // sense // intron // 6 /// ENST00000528509 // sense // intron // 7 /// OTTHUMT00000394356 // sense // intron // 7 /// OTTHUMT00000394360 // sense // intron // 7 /// OTTHUMT00000394365 // sense // intron // 6	---	miRBase
MIMAT0027408_st	hsa-miR-6754-5p	-0.396259	0.484497	0.992346	3.49453	2.62871	2.24753	2.87225	1.31826	2.99149	MIMAT0027408	miRNA	Homo sapiens	chr11:71184554-71184575 (+)	22	CCAGGGAGGCUGGUUUGGAGGA	ENST00000319023 // sense // intron // 7 /// ENST00000525200 // sense // intron // 6 /// ENST00000528509 // sense // intron // 7 /// OTTHUMT00000394356 // sense // intron // 7 /// OTTHUMT00000394360 // sense // intron // 7 /// OTTHUMT00000394365 // sense // intron // 6	---	miRBase
MIMAT0027412_st	hsa-miR-6756-5p	0.00845033	0.97696	0.998769	6.26866	6.0093	5.72716	6.24529	5.84332	5.94185	MIMAT0027412	miRNA	Homo sapiens	chr11:119183695-119183717 (-)	23	AGGGUGGGGCUGGAGGUGGGGCU	ENST00000264036 // sense // intron // 5 /// ENST00000392814 // sense // exon // 1 /// ENST00000525586 // sense // exon // 6 /// ENST00000528533 // sense // intron // 5 /// ENST00000530706 // sense // intron // 4 /// OTTHUMT00000388332 // sense // intron // 5 /// OTTHUMT00000388333 // sense // intron // 5 /// OTTHUMT00000388334 // sense // exon // 6 /// OTTHUMT00000388340 // sense // intron // 4	---	miRBase
MIMAT0027414_st	hsa-miR-6757-5p	-0.0205427	0.940704	0.998769	2.88666	2.92774	2.94143	3.19679	2.78	2.71741	MIMAT0027414	miRNA	Homo sapiens	chr12:53450733-53450754 (+)	22	UAGGGAUGGGAGGCCAGGAUGA	ENST00000314250 // sense // intron // 10 /// ENST00000314276 // sense // intron // 10 /// ENST00000379902 // sense // intron // 10 /// ENST00000451358 // sense // intron // 10 /// ENST00000546602 // sense // intron // 10 /// ENST00000549311 // sense // intron // 10 /// ENST00000549700 // sense // intron // 10 /// ENST00000552570 // sense // intron // 10 /// OTTHUMT00000405644 // sense // intron /…	---	miRBase
MIMAT0027416_st	hsa-miR-6758-5p	0.101998	0.774351	0.992346	0.0699099	0.212569	0.496807	0.952663	-0.0616518	0.194269	MIMAT0027416	miRNA	Homo sapiens	chr12:57906476-57906498 (+)	23	UAGAGAGGGGAAGGAUGUGAUGU	ENST00000262027 // sense // intron // 14 /// ENST00000315473 // sense // intron // 13 /// ENST00000537638 // sense // intron // 15 /// ENST00000545888 // sense // intron // 13 /// ENST00000546971 // sense // intron // 3 /// ENST00000548202 // sense // exon // 1 /// ENST00000548944 // sense // intron // 1 /// ENST00000549048 // sense // intron // 2 /// OTTHUMT00000407013 // sense // intron // 15 /…	hsa-mir-616 // chr12:57912946-57913042 (-) /// hsa-mir-6758 // chr12:57906471-57906533 (+)	miRBase
MIMAT0027418_st	hsa-miR-6759-5p	0.220048	0.595983	0.992346	0.24886	1.668	1.25946	1.2041	1.41661	1.21575	MIMAT0027418	miRNA	Homo sapiens	chr12:58142439-58142460 (-)	22	UUGUGGGUGGGCAGAAGUCUGU	ENST00000257904 // sense // intron // 7 /// ENST00000312990 // sense // intron // 6 /// ENST00000540325 // sense // intron // 6 /// ENST00000546489 // sense // intron // 6 /// ENST00000547992 // antisense // exon // 4 /// ENST00000549606 // sense // intron // 3 /// ENST00000552713 // sense // intron // 2 /// ENST00000553237 // sense // intron // 6 /// OTTHUMT00000408779 // antisense // exon // 4 …	---	miRBase
MIMAT0027420_st	hsa-miR-6760-5p	0.178749	0.634618	0.992346	0.371867	1.03705	0.790915	1.47533	0.421693	0.839058	MIMAT0027420	miRNA	Homo sapiens	chr12:111741951-111741973 (+)	23	CAGGGAGAAGGUGGAAGUGCAGA	ENST00000261726 // sense // intron // 9 /// OTTHUMT00000404765 // sense // intron // 9	---	miRBase
MIMAT0027422_st	hsa-miR-6761-5p	0.531503	0.159305	0.992346	0.0517418	0.825122	0.136775	1.14418	0.4559	1.00807	MIMAT0027422	miRNA	Homo sapiens	chr12:112237643-112237663 (+)	21	UCUGAGAGAGCUCGAUGGCAG	ENST00000261733 // sense // intron // 10 /// ENST00000416293 // sense // intron // 9 /// ENST00000548536 // sense // intron // 11 /// ENST00000549106 // sense // intron // 2 /// OTTHUMT00000405007 // sense // intron // 9 /// OTTHUMT00000405008 // sense // intron // 10 /// OTTHUMT00000405011 // sense // intron // 11 /// OTTHUMT00000405013 // sense // intron // 2	---	miRBase
MIMAT0027426_st	hsa-miR-6763-5p	0.0130439	0.965587	0.998769	4.43165	5.1198	4.95662	4.995	4.81997	4.73223	MIMAT0027426	miRNA	Homo sapiens	chr12:133158588-133158606 (+)	19	CUGGGGAGUGGCUGGGGAG	ENST00000261673 // sense // intron // 16 /// ENST00000434748 // sense // intron // 15 /// ENST00000542306 // sense // intron // 8 /// OTTHUMT00000397404 // sense // intron // 15 /// OTTHUMT00000397538 // sense // intron // 8	---	miRBase
MIMAT0027428_st	hsa-miR-6764-5p	0.134474	0.744346	0.992346	0.353825	0.353825	1.15496	0.468755	0.376987	1.42029	MIMAT0027428	miRNA	Homo sapiens	chr14:100743699-100743720 (+)	22	UCCCAGGGUCUGGUCAGAGUUG	ENST00000262238 // sense // intron // 4 /// ENST00000554579 // sense // intron // 1 /// ENST00000554804 // sense // intron // 3 /// ENST00000555735 // sense // exon // 1 /// OTTHUMT00000318277 // sense // intron // 4 /// OTTHUMT00000414048 // sense // intron // 3 /// OTTHUMT00000414049 // sense // exon // 1 /// OTTHUMT00000414050 // sense // intron // 1	---	miRBase
MIMAT0027430_st	hsa-miR-6765-5p	-0.221221	0.500552	0.992346	5.85723	6.20651	6.73189	5.87874	6.11583	6.1374	MIMAT0027430	miRNA	Homo sapiens	chr14:105617177-105617201 (-)	25	GUGAGGCGGGGCCAGGAGGGUGUGU	ENST00000331782 // sense // intron // 11 /// ENST00000347004 // sense // intron // 10 /// OTTHUMT00000276506 // sense // intron // 11 /// OTTHUMT00000276507 // sense // intron // 10	---	miRBase
MIMAT0027436_st	hsa-miR-6768-5p	0.628774	0.260059	0.992346	1.00213	3.04893	1.89859	2.94094	2.55591	2.33911	MIMAT0027436	miRNA	Homo sapiens	chr16:2513973-2513995 (+)	23	CACACAGGAAAAGCGGGGCCCUG	ENST00000361837 // sense // intron // 8 /// ENST00000483320 // sense // intron // 7 /// ENST00000563531 // sense // intron // 8 /// ENST00000565716 // sense // intron // 5 /// ENST00000568753 // sense // intron // 5 /// ENST00000569496 // sense // intron // 8 /// ENST00000569994 // sense // intron // 7 /// OTTHUMT00000250802 // sense // intron // 8 /// OTTHUMT00000250803 // sense // intron // 7 /…	---	miRBase
MIMAT0027438_st	hsa-miR-6769a-5p	0.310266	0.483949	0.992346	1.7589	2.60317	1.02959	2.3138	1.94211	2.06654	MIMAT0027438	miRNA	Homo sapiens	chr16:4721324-4721344 (+)	21	AGGUGGGUAUGGAGGAGCCCU	ENST00000262370 // sense // intron // 8 /// ENST00000399577 // sense // intron // 8 /// ENST00000415496 // sense // intron // 8 /// ENST00000536343 // sense // intron // 8 /// ENST00000586183 // sense // intron // 8 /// ENST00000587145 // sense // intron // 4 /// ENST00000587747 // sense // intron // 8 /// ENST00000588015 // sense // intron // 1 /// ENST00000588994 // sense // intron // 8 /// ENS…	---	miRBase
MIMAT0027620_st	hsa-miR-6769b-5p	-0.320845	0.340533	0.992346	5.54594	5.87235	5.554	4.89075	5.36038	5.75863	MIMAT0027620	miRNA	Homo sapiens	chr1:206648151-206648173 (+)	23	UGGUGGGUGGGGAGGAGAAGUGC	ENST00000367120 // sense // intron // 4 /// ENST00000462698 // sense // intron // 1 /// ENST00000463979 // sense // intron // 3 /// ENST00000476449 // sense // intron // 2 /// ENST00000537984 // sense // intron // 3 /// OTTHUMT00000088484 // sense // intron // 4 /// OTTHUMT00000088485 // sense // intron // 1 /// OTTHUMT00000088486 // sense // intron // 3 /// OTTHUMT00000088487 // sense // intron …	---	miRBase
MIMAT0027442_st	hsa-miR-6771-5p	0.18417	0.493243	0.992346	4.7536	4.98096	5.10193	5.08825	5.09467	5.20609	MIMAT0027442	miRNA	Homo sapiens	chr16:50326532-50326553 (+)	22	CUCGGGAGGGCAUGGGCCAGGC	ENST00000254235 // sense // intron // 3 /// ENST00000394697 // sense // intron // 4 /// ENST00000537579 // sense // intron // 3 /// ENST00000538642 // sense // intron // 5 /// ENST00000563677 // sense // intron // 1 /// ENST00000564044 // sense // intron // 1 /// ENST00000566433 // sense // intron // 4 /// ENST00000567277 // sense // intron // 3 /// OTTHUMT00000256877 // sense // intron // 4 /// …	---	miRBase
MIMAT0027445_st	hsa-miR-6772-3p	-0.374942	0.529579	0.992346	0.781582	2.9467	1.42504	0.829831	1.42504	1.77362	MIMAT0027445	miRNA	Homo sapiens	chr16:57806202-57806224 (-)	23	UUGCUCCUGACUCUGUGCCCACA	ENST00000379655 // sense // intron // 3 /// ENST00000421376 // sense // intron // 2 /// ENST00000445690 // sense // intron // 3 /// ENST00000465878 // sense // intron // 3 /// ENST00000539578 // sense // intron // 3 /// ENST00000540079 // sense // intron // 1 /// ENST00000541240 // sense // intron // 3 /// ENST00000543930 // sense // intron // 1 /// ENST00000561524 // sense // intron // 3 /// ENS…	---	miRBase
MIMAT0027444_st	hsa-miR-6772-5p	-0.524695	0.178638	0.992346	1.75531	1.94754	2.51898	1.91219	1.03941	1.69615	MIMAT0027444	miRNA	Homo sapiens	chr16:57806238-57806259 (-)	22	UGGGUGUAGGCUGGAGCUGAGG	ENST00000379655 // sense // intron // 3 /// ENST00000421376 // sense // intron // 2 /// ENST00000445690 // sense // intron // 3 /// ENST00000465878 // sense // intron // 3 /// ENST00000539578 // sense // intron // 3 /// ENST00000540079 // sense // intron // 1 /// ENST00000541240 // sense // intron // 3 /// ENST00000543930 // sense // intron // 1 /// ENST00000561524 // sense // intron // 3 /// ENS…	---	miRBase
MIMAT0027448_st	hsa-miR-6774-5p	-0.0991433	0.882751	0.998769	1.62748	3.3527	2.43871	2.7197	1.11686	3.2849	MIMAT0027448	miRNA	Homo sapiens	chr16:85951958-85951982 (+)	25	ACUUGGGCAGGAGGGACCCUGUAUG	ENST00000268638 // sense // intron // 6 /// ENST00000562492 // sense // intron // 2 /// ENST00000564803 // sense // intron // 6 /// ENST00000566369 // sense // intron // 2 /// ENST00000569145 // sense // intron // 2 /// ENST00000569607 // sense // intron // 1 /// OTTHUMT00000269100 // sense // intron // 6 /// OTTHUMT00000430847 // sense // intron // 2 /// OTTHUMT00000430859 // sense // intron // …	---	miRBase
MIMAT0027450_st	hsa-miR-6775-5p	-0.0330594	0.909246	0.998769	5.97261	6.0093	5.55194	5.8607	5.58039	5.99358	MIMAT0027450	miRNA	Homo sapiens	chr16:87868237-87868261 (-)	25	UCGGGGCAUGGGGGAGGGAGGCUGG	ENST00000261622 // sense // intron // 8 /// ENST00000563489 // sense // intron // 1 /// ENST00000565644 // sense // intron // 8 /// OTTHUMT00000269110 // sense // intron // 8 /// OTTHUMT00000431869 // sense // intron // 8 /// OTTHUMT00000431894 // sense // intron // 1	---	miRBase
MIMAT0027452_st	hsa-miR-6776-5p	-0.512704	0.199628	0.992346	3.84976	4.19817	4.20025	3.86128	2.87356	3.97523	MIMAT0027452	miRNA	Homo sapiens	chr17:2596190-2596208 (-)	19	UCUGGGUGCAGUGGGGGUU	ENST00000435359 // sense // intron // 19 /// ENST00000538975 // sense // intron // 18 /// ENST00000570628 // sense // intron // 19 /// ENST00000572014 // sense // intron // 2 /// ENST00000574210 // sense // intron // 3 /// ENST00000574426 // sense // intron // 18 /// ENST00000575014 // sense // intron // 17 /// OTTHUMT00000437807 // sense // intron // 19 /// OTTHUMT00000437809 // sense // intron …	---	miRBase
MIMAT0027454_st	hsa-miR-6777-5p	-0.036979	0.958169	0.998769	2.65219	2.67085	0.937793	2.60172	0.760269	2.78791	MIMAT0027454	miRNA	Homo sapiens	chr17:17716832-17716854 (-)	23	ACGGGGAGUCAGGCAGUGGUGGA	ENST00000261646 // sense // intron // 17 /// ENST00000338854 // sense // intron // 17 /// ENST00000355815 // sense // intron // 18 /// ENST00000395751 // sense // intron // 16 /// ENST00000395756 // sense // intron // 12 /// ENST00000395757 // sense // intron // 15 /// ENST00000478616 // sense // intron // 2 /// ENST00000485080 // sense // intron // 1 /// ENST00000486311 // sense // intron // 2 /…	hsa-mir-33b // chr17:17717150-17717245 (-) /// hsa-mir-6777 // chr17:17716794-17716859 (-)	miRBase
MIMAT0027456_st	hsa-miR-6778-5p	0.198607	0.594256	0.992346	3.31935	3.25728	2.76047	3.06382	2.94513	3.92397	MIMAT0027456	miRNA	Homo sapiens	chr17:18244174-18244195 (-)	22	AGUGGGAGGACAGGAGGCAGGU	ENST00000316694 // sense // intron // 5 /// ENST00000352886 // sense // intron // 5 /// ENST00000354098 // sense // intron // 5 /// ENST00000395684 // sense // exon // 1 /// ENST00000539052 // sense // intron // 4 /// ENST00000579558 // sense // intron // 5 /// ENST00000580002 // sense // intron // 4 /// OTTHUMT00000130831 // sense // intron // 5 /// OTTHUMT00000130833 // sense // intron // 5 ///…	---	miRBase
MIMAT0027458_st	hsa-miR-6779-5p	0.0279369	0.91791	0.998769	4.57971	4.91047	5.02593	4.84349	4.87022	4.88621	MIMAT0027458	miRNA	Homo sapiens	chr17:37071237-37071257 (+)	21	CUGGGAGGGGCUGGGUUUGGC	ENST00000318008 // sense // intron // 5 /// ENST00000419929 // sense // intron // 5 /// ENST00000433206 // sense // intron // 4 /// ENST00000435347 // sense // intron // 5 /// ENST00000443937 // sense // intron // 6 /// ENST00000579123 // sense // intron // 1 /// ENST00000581485 // sense // intron // 3 /// ENST00000585841 // sense // intron // 4 /// OTTHUMT00000256890 // sense // intron // 5 /// …	---	miRBase
MIMAT0027460_st	hsa-miR-6780a-5p	-0.0952557	0.72761	0.992346	1.20565	1.32937	1.23392	1.41022	0.952092	1.12086	MIMAT0027460	miRNA	Homo sapiens	chr17:40860142-40860164 (-)	23	UUGGGAGGGAAGACAGCUGGAGA	ENST00000415827 // sense // intron // 14 /// ENST00000428826 // sense // intron // 14 /// ENST00000435174 // sense // intron // 12 /// ENST00000585455 // sense // intron // 1 /// ENST00000585550 // sense // intron // 6 /// ENST00000585893 // sense // intron // 13 /// ENST00000585912 // sense // intron // 12 /// ENST00000586103 // sense // intron // 14 /// ENST00000588239 // sense // intron // 7 /…	---	miRBase
MIMAT0027572_st	hsa-miR-6780b-5p	0.190242	0.485666	0.992346	7.48351	7.65659	7.24202	7.6296	7.6114	7.71184	MIMAT0027572	miRNA	Homo sapiens	chr6:43402285-43402307 (+)	23	UGGGGAAGGCUUGGCAGGGAAGA	ENST00000244533 // sense // intron // 1 /// ENST00000372515 // sense // intron // 2 /// ENST00000372530 // sense // intron // 3 /// ENST00000443426 // sense // intron // 2 /// OTTHUMT00000040603 // sense // intron // 3 /// OTTHUMT00000040605 // sense // intron // 2 /// OTTHUMT00000040608 // sense // intron // 1 /// OTTHUMT00000358542 // sense // intron // 2	---	miRBase
MIMAT0027462_st	hsa-miR-6781-5p	0.593754	0.0650859	0.992346	1.52967	1.52743	1.32881	2.18264	1.73701	2.24753	MIMAT0027462	miRNA	Homo sapiens	chr17:40975936-40975956 (-)	21	CGGGCCGGAGGUCAAGGGCGU	ENST00000361523 // sense // intron // 1 /// ENST00000438274 // sense // intron // 1 /// ENST00000543382 // sense // intron // 1 /// ENST00000585515 // sense // intron // 1 /// ENST00000589636 // sense // intron // 3 /// ENST00000590099 // sense // intron // 1 /// ENST00000591085 // sense // intron // 1 /// ENST00000591307 // sense // intron // 1 /// ENST00000591404 // sense // intron // 3 /// ENS…	---	miRBase
MIMAT0027464_st	hsa-miR-6782-5p	0.191926	0.807874	0.992346	3.51043	4.8312	2.1145	3.87868	2.57198	4.58124	MIMAT0027464	miRNA	Homo sapiens	chr17:42285178-42285202 (-)	25	UAGGGGUGGGGGAAUUCAGGGGUGU	ENST00000302904 // sense // intron // 18 /// ENST00000343638 // sense // intron // 17 /// ENST00000393606 // sense // intron // 17 /// ENST00000436088 // sense // intron // 18 /// ENST00000526094 // sense // intron // 16 /// ENST00000527034 // sense // intron // 17 /// ENST00000529383 // sense // intron // 17 /// ENST00000529947 // sense // intron // 3 /// ENST00000533177 // sense // intron // 17…	---	miRBase
MIMAT0027470_st	hsa-miR-6785-5p	-0.232245	0.485627	0.992346	4.85368	4.74506	4.69696	4.94238	4.01772	4.63887	MIMAT0027470	miRNA	Homo sapiens	chr17:73494634-73494655 (+)	22	UGGGAGGGCGUGGAUGAUGGUG	ENST00000314256 // sense // intron // 29 /// ENST00000375248 // sense // intron // 28 /// ENST00000577194 // sense // exon // 2 /// ENST00000577245 // sense // intron // 3 /// ENST00000577247 // sense // intron // 5 /// ENST00000579208 // sense // intron // 21 /// ENST00000579898 // sense // exon // 6 /// ENST00000581085 // sense // intron // 28 /// ENST00000581453 // sense // intron // 5 /// ENS…	---	miRBase
MIMAT0027472_st	hsa-miR-6786-5p	-0.22847	0.481161	0.992346	7.74382	8.01765	8.59001	7.80877	8.01954	7.83775	MIMAT0027472	miRNA	Homo sapiens	chr17:79660839-79660859 (+)	21	GCGGUGGGGCCGGAGGGGCGU	ENST00000329138 // sense // intron // 10 /// ENST00000575058 // sense // intron // 1 /// OTTHUMT00000440541 // sense // intron // 10 /// OTTHUMT00000440681 // sense // intron // 1	---	miRBase
MIMAT0027474_st	hsa-miR-6787-5p	0.0125389	0.975078	0.998769	5.26982	5.66492	4.71172	5.70162	4.65899	5.32347	MIMAT0027474	miRNA	Homo sapiens	chr17:80194549-80194570 (+)	22	UGGCGGGGGUAGAGCUGGCUGC	ENST00000392339 // sense // intron // 2 /// ENST00000392341 // sense // intron // 2 /// ENST00000577650 // sense // intron // 3 /// ENST00000578522 // sense // intron // 2 /// ENST00000578574 // sense // exon // 2 /// ENST00000578684 // sense // intron // 2 /// ENST00000578810 // sense // exon // 1 /// ENST00000579572 // sense // intron // 2 /// ENST00000580098 // sense // intron // 2 /// ENST000…	---	miRBase
MIMAT0027478_st	hsa-miR-6789-5p	0.306707	0.398777	0.992346	4.36413	4.63108	4.789	4.30581	5.30671	5.0918	MIMAT0027478	miRNA	Homo sapiens	chr19:2235898-2235921 (-)	24	GUAGGGGCGUCCCGGGCGCGCGGG	ENST00000326631 // sense // intron // 2 /// ENST00000585423 // sense // intron // 1 /// ENST00000586497 // sense // intron // 1 /// ENST00000586608 // sense // exon // 2 /// ENST00000587394 // sense // intron // 2 /// ENST00000587962 // sense // intron // 2 /// ENST00000588356 // sense // intron // 2 /// ENST00000588450 // sense // exon // 2 /// ENST00000588545 // sense // intron // 2 /// ENST000…	hsa-mir-1227 // chr19:2234061-2234148 (-) /// hsa-mir-6789 // chr19:2235828-2235925 (-)	miRBase
MIMAT0027480_st	hsa-miR-6790-5p	-0.114271	0.847161	0.992346	1.43614	2.56584	1.32881	2.33734	0.50205	2.14858	MIMAT0027480	miRNA	Homo sapiens	chr19:6392972-6392994 (-)	23	GUGAGUGUGGAUUUGGCGGGGUU	ENST00000394456 // sense // intron // 1 /// ENST00000595047 // sense // intron // 1 /// ENST00000598607 // sense // intron // 2 /// OTTHUMT00000398033 // sense // intron // 1 /// OTTHUMT00000398035 // sense // intron // 1 /// OTTHUMT00000398037 // sense // intron // 2	hsa-mir-6790 // chr19:6392932-6392994 (-) /// hsa-mir-6885 // chr19:6389649-6389714 (-)	miRBase
MIMAT0027482_st	hsa-miR-6791-5p	-0.0197984	0.939781	0.998769	6.58697	6.83991	6.52595	6.66884	6.63842	6.58617	MIMAT0027482	miRNA	Homo sapiens	chr19:6736763-6736784 (-)	22	CCCCUGGGGCUGGGCAGGCGGA	ENST00000264080 // sense // intron // 1 /// ENST00000430424 // sense // intron // 1 /// ENST00000595108 // sense // intron // 1 /// ENST00000595620 // sense // intron // 1 /// ENST00000595908 // sense // intron // 1 /// ENST00000597043 // sense // exon // 1 /// ENST00000597298 // sense // intron // 1 /// ENST00000597706 // sense // intron // 1 /// ENST00000598052 // sense // intron // 1 /// ENST0…	---	miRBase
MIMAT0027484_st	hsa-miR-6792-5p	0.070371	0.846828	0.992346	2.43822	1.61763	1.88084	1.82597	2.54342	1.77842	MIMAT0027484	miRNA	Homo sapiens	chr19:7682325-7682345 (+)	21	GUAAGCAGGGGCUCUGGGUGA	ENST00000160298 // sense // intron // 15 /// ENST00000446248 // sense // intron // 17 /// ENST00000595692 // sense // intron // 4 /// OTTHUMT00000459300 // sense // intron // 15 /// OTTHUMT00000459301 // sense // intron // 17 /// OTTHUMT00000459302 // sense // intron // 4	---	miRBase
MIMAT0027486_st	hsa-miR-6793-5p	-0.204959	0.737452	0.992346	3.50824	2.87635	2.24753	3.41655	1.41661	3.18408	MIMAT0027486	miRNA	Homo sapiens	chr19:10939654-10939675 (+)	22	UGUGGGUUCUGGGUUGGGGUGA	ENST00000314646 // sense // intron // 18 /// ENST00000355667 // sense // intron // 18 /// ENST00000359692 // sense // intron // 17 /// ENST00000389253 // sense // intron // 18 /// ENST00000408974 // sense // intron // 17 /// ENST00000585892 // sense // intron // 18 /// ENST00000590806 // sense // intron // 4 /// ENST00000593203 // sense // intron // 2 /// OTTHUMT00000452590 // sense // intron // …	---	miRBase
MIMAT0027488_st	hsa-miR-6794-5p	-0.0684009	0.857136	0.995292	5.16034	5.67025	4.80694	5.35485	4.59375	5.48372	MIMAT0027488	miRNA	Homo sapiens	chr19:12963079-12963098 (+)	20	CAGGGGGACUGGGGGUGAGC	ENST00000251472 // sense // intron // 9 /// ENST00000588379 // sense // intron // 8 /// ENST00000589040 // sense // intron // 1 /// ENST00000589765 // antisense // intron // 1 /// ENST00000591495 // sense // intron // 10 /// OTTHUMT00000451500 // antisense // intron // 1 /// OTTHUMT00000451731 // sense // intron // 10 /// OTTHUMT00000451733 // sense // intron // 9 /// OTTHUMT00000451735 // sense …	---	miRBase
MIMAT0027490_st	hsa-miR-6795-5p	0.126973	0.726987	0.992346	1.94404	2.72663	1.62785	2.24753	2.03568	2.39623	MIMAT0027490	miRNA	Homo sapiens	chr19:15290133-15290156 (-)	24	UGGGGGGACAGGAUGAGAGGCUGU	ENST00000263388 // sense // intron // 21 /// ENST00000595045 // sense // intron // 1 /// ENST00000601011 // sense // intron // 20 /// OTTHUMT00000465714 // sense // intron // 21 /// OTTHUMT00000465717 // sense // intron // 20 /// OTTHUMT00000465719 // sense // intron // 1	---	miRBase
MIMAT0027492_st	hsa-miR-6796-5p	0.335352	0.497716	0.992346	4.86538	4.86052	4.11091	5.60121	3.99625	5.2454	MIMAT0027492	miRNA	Homo sapiens	chr19:40875758-40875780 (+)	23	UUGUGGGGUUGGAGAGCUGGCUG	ENST00000356508 // sense // intron // 6 /// ENST00000359274 // sense // intron // 5 /// ENST00000409281 // sense // intron // 6 /// ENST00000409419 // sense // intron // 5 /// ENST00000409587 // sense // intron // 6 /// ENST00000409735 // sense // intron // 6 /// ENST00000492243 // sense // intron // 2 /// ENST00000594908 // sense // intron // 6 /// ENST00000599353 // sense // intron // 1 /// OTT…	---	miRBase
MIMAT0027494_st	hsa-miR-6797-5p	-0.0186053	0.965887	0.998769	1.44371	2.9909	1.92378	2.02613	1.98885	2.28759	MIMAT0027494	miRNA	Homo sapiens	chr19:42373702-42373726 (+)	25	AGGAGGGAAGGGGCUGAGAACAGGA	ENST00000221975 // sense // intron // 4 /// ENST00000593863 // sense // intron // 4 /// ENST00000598742 // sense // intron // 4 /// OTTHUMT00000463049 // sense // intron // 4 /// OTTHUMT00000463053 // sense // intron // 4 /// OTTHUMT00000463054 // sense // intron // 4	---	miRBase
MIMAT0027496_st	hsa-miR-6798-5p	0.0981546	0.801984	0.992346	6.08519	6.28837	5.22373	6.19827	5.52603	6.16746	MIMAT0027496	miRNA	Homo sapiens	chr19:49513168-49513190 (+)	23	CCAGGGGGAUGGGCGAGCUUGGG	ENST00000221413 // sense // intron // 7 /// ENST00000413176 // sense // intron // 7 /// ENST00000594017 // sense // intron // 7 /// ENST00000594338 // sense // intron // 6 /// ENST00000595090 // sense // intron // 7 /// ENST00000596247 // sense // intron // 7 /// ENST00000601968 // sense // intron // 7 /// OTTHUMT00000466235 // sense // intron // 7 /// OTTHUMT00000466236 // sense // intron // 7 /…	---	miRBase
MIMAT0027498_st	hsa-miR-6799-5p	-0.195604	0.668839	0.992346	5.61801	5.22844	4.54013	5.28377	4.16432	5.35168	MIMAT0027498	miRNA	Homo sapiens	chr19:50295128-50295147 (+)	20	GGGGAGGUGUGCAGGGCUGG	ENST00000354293 // sense // intron // 4 /// ENST00000359032 // sense // intron // 4 /// ENST00000597774 // sense // intron // 3 /// ENST00000600199 // sense // intron // 4 /// OTTHUMT00000465806 // sense // intron // 4 /// OTTHUMT00000465807 // sense // intron // 4 /// OTTHUMT00000465809 // sense // intron // 4 /// OTTHUMT00000465810 // sense // intron // 3	---	miRBase
MIMAT0027501_st	hsa-miR-6800-3p	0.751869	0.183224	0.992346	1.1099	2.76032	1.48993	2.56584	1.90996	3.13995	MIMAT0027501	miRNA	Homo sapiens	chr19:50335333-50335353 (+)	21	CACCUCUCCUGGCAUCGCCCC	ENST00000312865 // sense // 3UTR // 11 /// ENST00000538643 // sense // 3UTR // 6 /// ENST00000595185 // sense // intron // 6 /// ENST00000599722 // sense // exon // 3 /// OTTHUMT00000465316 // sense // 3UTR // 11 /// OTTHUMT00000465331 // sense // intron // 6 /// OTTHUMT00000465332 // sense // 3UTR // 6 /// OTTHUMT00000465334 // sense // exon // 3	---	miRBase
MIMAT0027500_st	hsa-miR-6800-5p	0.766979	0.0602218	0.992346	5.19986	4.36977	4.2211	5.63562	5.28762	5.16842	MIMAT0027500	miRNA	Homo sapiens	chr19:50335279-50335299 (+)	21	GUAGGUGACAGUCAGGGGCGG	ENST00000312865 // sense // 3UTR // 11 /// ENST00000538643 // sense // 3UTR // 6 /// ENST00000595185 // sense // intron // 6 /// ENST00000599722 // sense // exon // 3 /// OTTHUMT00000465316 // sense // 3UTR // 11 /// OTTHUMT00000465331 // sense // intron // 6 /// OTTHUMT00000465332 // sense // 3UTR // 6 /// OTTHUMT00000465334 // sense // exon // 3	---	miRBase
MIMAT0027502_st	hsa-miR-6801-5p	-0.321395	0.347135	0.992346	0.517578	-0.172999	0.500284	0.146008	0.113512	-0.37884	MIMAT0027502	miRNA	Homo sapiens	chr19:52725278-52725300 (+)	23	UGGUCAGAGGCAGCAGGAAAUGA	ENST00000322088 // sense // intron // 12 /// ENST00000391791 // sense // intron // 1 /// ENST00000444322 // sense // intron // 11 /// ENST00000462990 // sense // intron // 12 /// OTTHUMT00000267967 // sense // intron // 12 /// OTTHUMT00000267969 // sense // intron // 12 /// OTTHUMT00000462760 // sense // intron // 1	---	miRBase
MIMAT0027504_st	hsa-miR-6802-5p	-0.00771	0.991472	0.998769	3.52486	4.65807	2.20418	3.68289	2.43478	4.24632	MIMAT0027504	miRNA	Homo sapiens	chr19:55751320-55751339 (-)	20	CUAGGUGGGGGGCUUGAAGC	ENST00000412770 // sense // intron // 12 /// ENST00000587283 // sense // intron // 11 /// OTTHUMT00000452663 // sense // intron // 12 /// OTTHUMT00000452664 // sense // intron // 11	hsa-mir-6802 // chr19:55751280-55751344 (-) /// hsa-mir-6803 // chr19:55756554-55756618 (-) /// hsa-mir-6804 // chr19:55742253-55742320 (-)	miRBase
MIMAT0027506_st	hsa-miR-6803-5p	-0.199275	0.557252	0.992346	7.62717	7.88957	7.27466	7.58194	6.93758	7.67405	MIMAT0027506	miRNA	Homo sapiens	chr19:55756592-55756613 (-)	22	CUGGGGGUGGGGGGCUGGGCGU	ENST00000412770 // sense // intron // 4 /// ENST00000587283 // sense // intron // 3 /// OTTHUMT00000452663 // sense // intron // 4 /// OTTHUMT00000452664 // sense // intron // 3	hsa-mir-6802 // chr19:55751280-55751344 (-) /// hsa-mir-6803 // chr19:55756554-55756618 (-)	miRBase
MIMAT0027510_st	hsa-miR-6805-5p	0.332877	0.321505	0.992346	4.54506	4.83128	4.36958	4.50967	4.91696	5.31792	MIMAT0027510	miRNA	Homo sapiens	chr19:55899554-55899575 (+)	22	UAGGGGGCGGCUUGUGGAGUGU	ENST00000344063 // sense // intron // 4 /// ENST00000426763 // sense // exon // 2 /// ENST00000458349 // sense // intron // 3 /// ENST00000558131 // sense // intron // 3 /// ENST00000558815 // sense // intron // 4 /// ENST00000559463 // sense // intron // 3 /// ENST00000560055 // sense // intron // 4 /// ENST00000560583 // sense // exon // 4 /// ENST00000560881 // sense // intron // 3 /// OTTHUMT…	---	miRBase
MIMAT0027513_st	hsa-miR-6806-3p	-0.0740627	0.843322	0.992346	4.20023	3.48353	4.18173	3.52345	4.42882	3.69104	MIMAT0027513	miRNA	Homo sapiens	chr19:58846096-58846117 (+)	22	UGAAGCUCUGACAUUCCUGCAG	ENST00000329665 // sense // intron // 1 /// OTTHUMT00000466765 // sense // intron // 1	---	miRBase
MIMAT0027512_st	hsa-miR-6806-5p	0.8506	0.0555784	0.992346	1.10396	2.03271	2.36113	2.76607	2.49503	2.78849	MIMAT0027512	miRNA	Homo sapiens	chr19:58846059-58846082 (+)	24	UGUAGGCAUGAGGCAGGGCCCAGG	ENST00000329665 // sense // intron // 1 /// OTTHUMT00000466765 // sense // intron // 1	---	miRBase
MIMAT0027514_st	hsa-miR-6807-5p	-1.78699	0.00659402	0.992346	3.63275	3.04521	4.19527	2.59279	1.03551	1.88396	MIMAT0027514	miRNA	Homo sapiens	chr19:59061652-59061673 (+)	22	GUGAGCCAGUGGAAUGGAGAGG	ENST00000253024 // sense // intron // 16 /// ENST00000341753 // sense // intron // 14 /// ENST00000595974 // sense // intron // 3 /// ENST00000597136 // sense // intron // 9 /// ENST00000598355 // sense // intron // 3 /// OTTHUMT00000467074 // sense // intron // 16 /// OTTHUMT00000467075 // sense // intron // 14 /// OTTHUMT00000467082 // sense // intron // 9 /// OTTHUMT00000467084 // sense // int…	---	miRBase
MIMAT0027517_st	hsa-miR-6808-3p	-0.0234903	0.955848	0.998769	5.29948	5.10975	6.08147	5.2203	6.14073	5.0592	MIMAT0027517	miRNA	Homo sapiens	chr1:1275030-1275050 (-)	21	GUGUGACCACCGUUCCUGCAG	ENST00000378888 // sense // intron // 9 /// ENST00000378891 // sense // intron // 9 /// OTTHUMT00000008487 // sense // intron // 9 /// OTTHUMT00000008490 // sense // intron // 9	---	miRBase
MIMAT0027516_st	hsa-miR-6808-5p	-0.0178546	0.958279	0.998769	3.30738	3.57096	2.57465	3.12376	3.23984	3.03582	MIMAT0027516	miRNA	Homo sapiens	chr1:1275062-1275083 (-)	22	CAGGCAGGGAGGUGGGACCAUG	ENST00000378888 // sense // intron // 9 /// ENST00000378891 // sense // intron // 9 /// OTTHUMT00000008487 // sense // intron // 9 /// OTTHUMT00000008490 // sense // intron // 9	---	miRBase
MIMAT0027520_st	hsa-miR-6810-5p	0.399433	0.386243	0.992346	0.206706	1.38173	0.567259	1.74885	1.03789	0.567259	MIMAT0027520	miRNA	Homo sapiens	chr2:219206639-219206661 (+)	23	AUGGGGACAGGGAUCAGCAUGGC	ENST00000258362 // sense // intron // 5 /// ENST00000273077 // sense // intron // 6 /// ENST00000411433 // antisense // intron // 2 /// ENST00000436005 // sense // intron // 5 /// OTTHUMT00000256775 // sense // intron // 6 /// OTTHUMT00000256776 // sense // intron // 5 /// OTTHUMT00000338555 // sense // intron // 5 /// OTTHUMT00000338557 // antisense // intron // 2	---	miRBase
MIMAT0027524_st	hsa-miR-6812-5p	0.00392222	0.988633	0.998769	4.80723	4.67378	4.69695	4.73803	4.47837	4.97332	MIMAT0027524	miRNA	Homo sapiens	chr20:44054155-44054179 (+)	25	AUGGGGUGAGAUGGGGAGGAGCAGC	ENST00000279035 // sense // intron // 9 /// ENST00000279036 // sense // intron // 11 /// ENST00000341555 // sense // intron // 6 /// ENST00000372689 // sense // intron // 10 /// ENST00000535404 // sense // intron // 10 /// ENST00000543458 // sense // intron // 10 /// ENST00000545755 // sense // intron // 8 /// OTTHUMT00000079434 // sense // intron // 11	---	miRBase
MIMAT0027526_st	hsa-miR-6813-5p	0.389617	0.362692	0.992346	0.700189	1.35828	1.08135	1.08135	1.01053	2.21679	MIMAT0027526	miRNA	Homo sapiens	chr20:62708336-62708358 (-)	23	CAGGGGCUGGGGUUUCAGGUUCU	ENST00000332298 // sense // intron // 1 /// ENST00000395042 // sense // intron // 1 /// ENST00000479996 // sense // intron // 1 /// ENST00000493165 // sense // intron // 1 /// OTTHUMT00000080273 // sense // intron // 1 /// OTTHUMT00000080274 // sense // intron // 1 /// OTTHUMT00000080275 // sense // intron // 1	---	miRBase
MIMAT0027528_st	hsa-miR-6814-5p	-0.195262	0.704147	0.992346	0.901807	0.933341	0.482612	1.58439	-0.378806	0.526383	MIMAT0027528	miRNA	Homo sapiens	chr21:43166975-43166996 (-)	22	UCCCAAGGGUGAGAUGCUGCCA	ENST00000332512 // sense // intron // 4 /// ENST00000352483 // sense // intron // 4 /// ENST00000542057 // sense // intron // 4 /// ENST00000544709 // sense // intron // 4 /// OTTHUMT00000195204 // sense // intron // 4	---	miRBase
MIMAT0027530_st	hsa-miR-6815-5p	0.093104	0.810598	0.992346	0.767515	1.71413	0.994924	0.849204	1.15954	1.74714	MIMAT0027530	miRNA	Homo sapiens	chr21:46898185-46898207 (+)	23	UAGGUGGCGCCGGAGGAGUCAUU	ENST00000355480 // sense // intron // 7 /// ENST00000359759 // sense // intron // 7 /// ENST00000400337 // sense // intron // 8 /// OTTHUMT00000206827 // sense // intron // 7 /// OTTHUMT00000206828 // sense // intron // 8	---	miRBase
MIMAT0027532_st	hsa-miR-6816-5p	-0.0653004	0.824521	0.992346	6.42813	6.82922	6.86309	6.36051	6.72122	6.8428	MIMAT0027532	miRNA	Homo sapiens	chr22:20102249-20102269 (-)	21	UGGGGCGGGGCAGGUCCCUGC	ENST00000252136 // sense // intron // 6 /// ENST00000403707 // sense // intron // 7 /// ENST00000404751 // sense // intron // 6 /// ENST00000439169 // sense // intron // 6 /// ENST00000463710 // sense // intron // 2 /// ENST00000471040 // sense // intron // 2 /// ENST00000488335 // sense // intron // 1 /// ENST00000492988 // sense // intron // 4 /// ENST00000494820 // sense // intron // 4 /// OTT…	---	miRBase
MIMAT0027538_st	hsa-miR-6819-5p	-0.120861	0.703567	0.992346	3.09897	3.43418	3.92017	3.33944	3.23416	3.51712	MIMAT0027538	miRNA	Homo sapiens	chr22:36682927-36682948 (-)	22	UUGGGGUGGAGGGCCAAGGAGC	ENST00000216181 // sense // intron // 34 /// OTTHUMT00000259110 // sense // intron // 34	---	miRBase
MIMAT0027540_st	hsa-miR-6820-5p	0.138712	0.657551	0.992346	2.06	2.62438	2.77023	2.45477	2.59958	2.81639	MIMAT0027540	miRNA	Homo sapiens	chr22:38363575-38363593 (+)	19	UGCGGCAGAGCUGGGGUCA	ENST00000405557 // sense // intron // 4 /// ENST00000407936 // sense // intron // 4 /// ENST00000442738 // sense // intron // 4 /// ENST00000443002 // sense // intron // 4 /// ENST00000470701 // sense // intron // 4 /// ENST00000483713 // sense // intron // 4 /// ENST00000484894 // sense // intron // 4 /// ENST00000492213 // sense // intron // 5 /// OTTHUMT00000321570 // sense // intron // 4 /// …	---	miRBase
MIMAT0027542_st	hsa-miR-6821-5p	0.0017556	0.995101	0.998769	5.37368	5.50719	5.34293	5.46238	5.08729	5.6794	MIMAT0027542	miRNA	Homo sapiens	chr22:50356514-50356536 (+)	23	GUGCGUGGUGGCUCGAGGCGGGG	ENST00000360612 // sense // intron // 5 /// OTTHUMT00000317406 // sense // intron // 5	---	miRBase
MIMAT0027545_st	hsa-miR-6822-3p	-0.908724	0.0655035	0.992346	0.714874	2.1344	1.56181	0.991972	0.413606	0.27933	MIMAT0027545	miRNA	Homo sapiens	chr3:39179733-39179756 (+)	24	AGGCUCUAACUGGCUUUCCCUGCA	ENST00000301819 // sense // intron // 26 /// ENST00000430597 // sense // intron // 26 /// ENST00000431162 // sense // intron // 26 /// ENST00000440121 // sense // intron // 25 /// ENST00000460460 // sense // exon // 1 /// ENST00000472866 // sense // intron // 8 /// ENST00000493856 // sense // intron // 7 /// OTTHUMT00000342541 // sense // intron // 25 /// OTTHUMT00000342544 // sense // intron // …	---	miRBase
MIMAT0027548_st	hsa-miR-6824-5p	0.693774	0.189672	0.992346	2.69035	4.047	2.67491	3.8061	3.2687	4.41878	MIMAT0027548	miRNA	Homo sapiens	chr3:48671105-48671126 (-)	22	GUAGGGGAGGUUGGGCCAGGGA	ENST00000307364 // sense // intron // 1 /// ENST00000337000 // sense // intron // 1 /// ENST00000358747 // sense // 5UTR // 1 /// ENST00000383733 // sense // intron // 1 /// ENST00000395550 // sense // intron // 1 /// ENST00000420764 // sense // intron // 1 /// ENST00000426599 // sense // intron // 1 /// ENST00000431739 // sense // intron // 1 /// ENST00000455886 // sense // intron // 1 /// ENST0…	---	miRBase
MIMAT0027550_st	hsa-miR-6825-5p	0.289371	0.674795	0.992346	2.22127	3.56825	0.880762	2.84679	1.88085	2.81075	MIMAT0027550	miRNA	Homo sapiens	chr3:127294148-127294169 (-)	22	UGGGGAGGUGUGGAGUCAGCAU	ENST00000296210 // sense // intron // 7 /// ENST00000355552 // sense // intron // 9 /// ENST00000393400 // sense // intron // 8 /// ENST00000450633 // sense // intron // 8 /// ENST00000465915 // sense // intron // 1 /// ENST00000483868 // sense // intron // 8 /// ENST00000489960 // sense // intron // 10 /// OTTHUMT00000356624 // sense // intron // 9 /// OTTHUMT00000356625 // sense // intron // 8 …	---	miRBase
MIMAT0027552_st	hsa-miR-6826-5p	0.651148	0.161511	0.992346	1.28083	1.33937	0.52871	1.88747	0.964186	2.2507	MIMAT0027552	miRNA	Homo sapiens	chr3:128990994-128991016 (+)	23	UCAAUAGGAAAGAGGUGGGACCU	ENST00000314797 // sense // intron // 19 /// ENST00000509889 // sense // intron // 1 /// ENST00000515725 // sense // intron // 18 /// OTTHUMT00000355456 // sense // intron // 19 /// OTTHUMT00000355457 // sense // intron // 18 /// OTTHUMT00000355463 // sense // intron // 1	---	miRBase
MIMAT0027554_st	hsa-miR-6827-5p	-0.0400951	0.936171	0.998769	2.15435	1.32299	1.65567	2.32601	0.654758	2.03195	MIMAT0027554	miRNA	Homo sapiens	chr3:134086678-134086699 (-)	22	UGGGAGCCAUGAGGGUCUGUGC	ENST00000249883 // sense // intron // 2 /// ENST00000422605 // sense // intron // 2 /// ENST00000511759 // sense // intron // 2 /// ENST00000512955 // sense // intron // 2 /// ENST00000513145 // sense // intron // 2 /// ENST00000514516 // sense // intron // 2 /// OTTHUMT00000357273 // sense // intron // 2 /// OTTHUMT00000357274 // sense // intron // 2 /// OTTHUMT00000357368 // sense // intron // …	---	miRBase
MIMAT0027558_st	hsa-miR-6829-5p	-0.564662	0.4233	0.992346	3.36328	4.50741	3.15765	3.55743	1.68257	4.09436	MIMAT0027558	miRNA	Homo sapiens	chr3:195609242-195609261 (-)	20	UGGGCUGCUGAGAAGGGGCA	ENST00000316664 // sense // intron // 5 /// ENST00000333602 // sense // intron // 5 /// ENST00000381916 // sense // intron // 5 /// ENST00000392400 // sense // intron // 5 /// ENST00000428187 // sense // intron // 5 /// ENST00000430929 // sense // intron // 3 /// ENST00000438207 // sense // intron // 3 /// ENST00000439230 // sense // intron // 5 /// ENST00000464041 // sense // intron // 5 /// ENS…	---	miRBase
MIMAT0027560_st	hsa-miR-6830-5p	0.246134	0.44379	0.992346	0.342621	0.769402	0.501423	1.10313	0.371867	0.876846	MIMAT0027560	miRNA	Homo sapiens	chr5:131553585-131553606 (-)	22	CCAAGGAAGGAGGCUGGACAUC	ENST00000166534 // sense // intron // 3 /// ENST00000360568 // sense // intron // 2 /// ENST00000379086 // sense // intron // 3 /// ENST00000379100 // sense // intron // 2 /// ENST00000379104 // sense // intron // 2 /// ENST00000395164 // sense // intron // 2 /// ENST00000401867 // sense // intron // 3 /// ENST00000416053 // sense // intron // 2 /// ENST00000417528 // sense // intron // 3 /// ENS…	---	miRBase
MIMAT0027562_st	hsa-miR-6831-5p	-0.329171	0.643178	0.992346	3.04919	3.91462	1.73033	3.27508	1.40103	3.03052	MIMAT0027562	miRNA	Homo sapiens	chr5:139943312-139943335 (-)	24	UAGGUAGAGUGUGAGGAGGAGGUC	ENST00000354402 // sense // intron // 2 /// ENST00000356738 // sense // intron // 2 /// ENST00000357560 // sense // intron // 2 /// ENST00000358580 // sense // intron // 2 /// ENST00000412920 // sense // intron // 2 /// ENST00000467078 // sense // intron // 2 /// ENST00000503850 // sense // intron // 2 /// ENST00000505617 // sense // intron // 2 /// ENST00000506165 // sense // exon // 2 /// ENST0…	---	miRBase
MIMAT0027576_st	hsa-miR-6837-5p	-0.392626	0.524375	0.992346	0.326652	1.24734	2.78267	0.80906	1.18486	1.18486	MIMAT0027576	miRNA	Homo sapiens	chr7:44091370-44091390 (+)	21	ACCAGGGCCAGCAGGGAAUGU	ENST00000411855 // sense // intron // 2 /// ENST00000423561 // sense // intron // 2 /// ENST00000429716 // sense // intron // 2 /// ENST00000432854 // sense // intron // 1 /// ENST00000439815 // sense // intron // 1 /// ENST00000440166 // sense // intron // 1 /// ENST00000441840 // sense // intron // 2 /// ENST00000441904 // sense // intron // 2 /// ENST00000448521 // sense // intron // 2 /// ENS…	---	miRBase
MIMAT0027583_st	hsa-miR-6840-3p	-0.371181	0.539363	0.992346	2.19584	1.61631	0.762751	2.27856	0.371867	0.810942	MIMAT0027583	miRNA	Homo sapiens	chr7:99954319-99954340 (+)	22	GCCCAGGACUUUGUGCGGGGUG	ENST00000310771 // sense // intron // 13 /// ENST00000419749 // sense // intron // 8 /// ENST00000422808 // sense // intron // 7 /// ENST00000431140 // sense // intron // 2 /// ENST00000438028 // sense // intron // 6 /// ENST00000443526 // sense // intron // 4 /// ENST00000444073 // sense // intron // 2 /// ENST00000444874 // sense // intron // 12 /// ENST00000448382 // sense // 3UTR // 5 /// ENS…	---	miRBase
MIMAT0027590_st	hsa-miR-6845-5p	-0.240546	0.667764	0.992346	0.623916	2.53248	2.11527	1.19545	1.23635	2.11823	MIMAT0027590	miRNA	Homo sapiens	chr8:144919965-144919983 (-)	19	CGGGGCCAGAGCAGAGAGC	ENST00000327830 // sense // intron // 9 /// ENST00000423469 // sense // exon // 1 /// ENST00000442628 // sense // intron // 10 /// ENST00000529747 // sense // intron // 6 /// ENST00000531729 // sense // exon // 1 /// ENST00000532940 // sense // intron // 7 /// ENST00000533093 // sense // intron // 9 /// ENST00000533846 // sense // intron // 8 /// OTTHUMT00000382245 // sense // intron // 9 /// OTT…	---	miRBase
MIMAT0027592_st	hsa-miR-6846-5p	-0.094843	0.791254	0.992346	2.7569	3.68793	3.40696	3.00848	2.99148	3.56731	MIMAT0027592	miRNA	Homo sapiens	chr8:145112257-145112278 (-)	22	UGGGGGCUGGAUGGGGUAGAGU	ENST00000426825 // sense // intron // 10 /// ENST00000534424 // sense // intron // 10 /// OTTHUMT00000384059 // sense // intron // 10	---	miRBase
MIMAT0027594_st	hsa-miR-6847-5p	0.664131	0.398626	0.992346	3.21303	2.19101	1.38101	4.32081	1.58339	2.87324	MIMAT0027594	miRNA	Homo sapiens	chr8:145134782-145134804 (+)	23	ACAGAGGACAGUGGAGUGUGAGC	ENST00000316052 // sense // intron // 1 /// ENST00000525936 // sense // intron // 1 /// ENST00000527954 // sense // 3UTR // 1 /// OTTHUMT00000384065 // sense // intron // 1 /// OTTHUMT00000384066 // sense // intron // 1 /// OTTHUMT00000384067 // sense // 3UTR // 1	---	miRBase
MIMAT0027596_st	hsa-miR-6848-5p	0.223254	0.505178	0.992346	3.15632	4.11205	3.69121	3.79516	3.96679	3.8674	MIMAT0027596	miRNA	Homo sapiens	chr8:145540951-145540973 (-)	23	UGGGGGCUGGGAUGGGCCAUGGU	ENST00000332324 // sense // exon // 14 /// ENST00000524844 // sense // intron // 6 /// ENST00000524965 // sense // exon // 10 /// ENST00000526479 // sense // intron // 2 /// ENST00000527438 // sense // exon // 1 /// ENST00000527885 // sense // exon // 2 /// ENST00000528718 // sense // exon // 3 /// OTTHUMT00000382059 // sense // exon // 14 /// OTTHUMT00000382060 // sense // exon // 10 /// OTTHUMT…	---	miRBase
MIMAT0027598_st	hsa-miR-6849-5p	-0.324274	0.620812	0.992346	5.62799	5.39508	4.38929	5.76248	3.47227	5.20478	MIMAT0027598	miRNA	Homo sapiens	chr8:145625712-145625734 (-)	23	GAGUGGAUAGGGGAGUGUGUGGA	ENST00000349769 // sense // intron // 8 /// ENST00000531683 // sense // intron // 6 /// ENST00000532560 // sense // exon // 3 /// OTTHUMT00000382422 // sense // intron // 8 /// OTTHUMT00000382428 // sense // exon // 3 /// OTTHUMT00000382429 // sense // intron // 6	hsa-mir-939 // chr8:145619364-145619445 (-) /// hsa-mir-1234 // chr8:145625476-145625559 (-) /// hsa-mir-6849 // chr8:145625671-145625739 (-)	miRBase
MIMAT0027600_st	hsa-miR-6850-5p	-0.038899	0.879855	0.998769	6.2804	6.23645	6.11269	6.13176	6.27786	6.10323	MIMAT0027600	miRNA	Homo sapiens	chr8:146017355-146017376 (-)	22	GUGCGGAACGCUGGCCGGGGCG	ENST00000262584 // sense // intron // 2 /// ENST00000394920 // sense // intron // 2 /// ENST00000525232 // sense // intron // 2 /// ENST00000526668 // sense // exon // 1 /// ENST00000527914 // sense // intron // 2 /// ENST00000528296 // sense // intron // 1 /// ENST00000528957 // sense // intron // 1 /// ENST00000529163 // sense // intron // 1 /// ENST00000529920 // sense // intron // 1 /// ENST0…	---	miRBase
MIMAT0027610_st	hsa-miR-6855-5p	0.0984308	0.828742	0.992346	1.27069	2.16854	0.901913	1.74885	0.908148	1.97944	MIMAT0027610	miRNA	Homo sapiens	chr9:132631889-132631913 (+)	25	UUGGGGUUUGGGGUGCAGACAUUGC	ENST00000315480 // sense // intron // 13 /// ENST00000358355 // sense // intron // 13 /// ENST00000372429 // sense // intron // 13 /// ENST00000474895 // sense // intron // 2 /// ENST00000491731 // sense // intron // 3 /// OTTHUMT00000054602 // sense // intron // 13 /// OTTHUMT00000054603 // sense // intron // 13 /// OTTHUMT00000054604 // sense // intron // 13 /// OTTHUMT00000054607 // sense // i…	---	miRBase
MIMAT0027612_st	hsa-miR-6856-5p	-0.420517	0.595392	0.992346	4.83617	3.82833	2.45625	4.31569	1.97582	3.56769	MIMAT0027612	miRNA	Homo sapiens	chr9:133501689-133501712 (+)	24	AAGAGAGGAGCAGUGGUGCUGUGG	ENST00000319725 // sense // intron // 11 /// ENST00000487406 // sense // intron // 3 /// OTTHUMT00000054666 // sense // intron // 11 /// OTTHUMT00000054671 // sense // intron // 3	---	miRBase
MIMAT0027614_st	hsa-miR-6857-5p	0.743006	0.0949858	0.992346	-0.0773927	0.696666	0.747698	1.80126	0.747698	1.04703	MIMAT0027614	miRNA	Homo sapiens	chrX:53432671-53432692 (-)	22	UUGGGGAUUGGGUCAGGCCAGU	ENST00000322213 // sense // intron // 10 /// ENST00000375340 // sense // intron // 7 /// OTTHUMT00000056756 // sense // intron // 10	---	miRBase
MIMAT0027616_st	hsa-miR-6858-5p	0.107342	0.685448	0.992346	6.1336	6.05863	6.08281	6.16433	6.04026	6.39249	MIMAT0027616	miRNA	Homo sapiens	chrX:153678668-153678689 (+)	22	GUGAGGAGGGGCUGGCAGGGAC	ENST00000393600 // sense // intron // 12 /// ENST00000464419 // sense // intron // 11 /// OTTHUMT00000081643 // sense // intron // 12 /// OTTHUMT00000081647 // sense // intron // 11	---	miRBase
MIMAT0027618_st	hsa-miR-6859-5p	-0.000519489	0.998769	0.998769	0.425822	0.773755	1.03752	0.727178	0.346559	1.1618	MIMAT0027618	miRNA	Homo sapiens	chr1:17409-17431 (-)	23	GAGAGGAACAUGGGCUCAGGACA	ENST00000423562 // sense // intron // 4 /// ENST00000438504 // sense // intron // 5 /// ENST00000488147 // sense // intron // 5 /// ENST00000538476 // sense // intron // 5 /// ENST00000541675 // sense // intron // 5 /// OTTHUMT00000002839 // sense // intron // 5 /// ENST00000338304 // sense // intron // 7 /// ENST00000354296 // sense // intron // 6 /// ENST00000378819 // sense // intron // 6 /// …	---	miRBase
MIMAT0027622_st	hsa-miR-6860	0.00410061	0.991221	0.998769	4.05055	4.3623	3.38331	4.3632	3.80126	3.644	MIMAT0027622	miRNA	Homo sapiens	chr11:66813154-66813175 (+)	22	ACUGGGCAGGGCUGUGGUGAGU	ENST00000393946 // sense // intron // 9 /// ENST00000525457 // sense // intron // 6 /// ENST00000527043 // sense // intron // 6 /// OTTHUMT00000393129 // sense // intron // 9 /// OTTHUMT00000393130 // sense // intron // 6 /// OTTHUMT00000393131 // sense // intron // 6	---	miRBase
MIMAT0027623_st	hsa-miR-6861-5p	0.100922	0.873145	0.998769	1.82895	3.20355	1.20293	2.52617	1.23074	2.78129	MIMAT0027623	miRNA	Homo sapiens	chr12:112601099-112601120 (-)	22	ACUGGGUAGGUGGGGCUCCAGG	ENST00000377560 // sense // exon // 74 /// ENST00000430131 // sense // exon // 74 /// ENST00000547085 // sense // exon // 6 /// ENST00000550722 // sense // exon // 75 /// OTTHUMT00000405222 // sense // exon // 75 /// OTTHUMT00000405409 // sense // exon // 6	---	miRBase
MIMAT0027625_st	hsa-miR-6862-5p	-0.115287	0.672467	0.992346	0.868574	0.891516	0.960342	0.530963	0.952092	0.891516	MIMAT0027625	miRNA	Homo sapiens	chr16:28402346-28402367 (-)	22	CGGGCAUGCUGGGAGAGACUUU	ENST00000380876 // sense // intron // 10 /// ENST00000398943 // sense // intron // 10 /// ENST00000398944 // sense // intron // 10 /// OTTHUMT00000214116 // sense // intron // 10 /// ENST00000331666 // sense // intron // 10 /// ENST00000395587 // sense // intron // 10 /// ENST00000562217 // antisense // intron // 1 /// ENST00000564243 // sense // intron // 10 /// ENST00000565932 // sense // intro…	---	miRBase
MIMAT0027630_st	hsa-miR-6865-5p	0.204447	0.651406	0.992346	1.53151	2.3111	3.11158	2.39195	2.30202	2.87356	MIMAT0027630	miRNA	Homo sapiens	chr17:4873418-4873440 (-)	23	UAGGUGGCAGAGGAGGGACUUCA	ENST00000348066 // sense // intron // 17 /// ENST00000358183 // sense // intron // 17 /// ENST00000361571 // sense // intron // 16 /// ENST00000381311 // sense // intron // 16 /// ENST00000414043 // sense // intron // 17 /// ENST00000572543 // sense // intron // 17 /// ENST00000574951 // sense // intron // 16 /// ENST00000576872 // sense // intron // 3 /// OTTHUMT00000216876 // sense // intron //…	hsa-mir-6864 // chr17:4872997-4873066 (-) /// hsa-mir-6865 // chr17:4873381-4873445 (-)	miRBase
MIMAT0027637_st	hsa-miR-6868-3p	0.0758095	0.778826	0.992346	0.417751	0.262582	0.57292	0.675441	0.38749	0.417751	MIMAT0027637	miRNA	Homo sapiens	chr17:74094100-74094120 (-)	21	UUCCUUCUGUUGUCUGUGCAG	ENST00000332065 // sense // intron // 4 /// ENST00000335146 // sense // intron // 4 /// ENST00000357231 // sense // intron // 2 /// ENST00000405068 // sense // intron // 4 /// ENST00000405575 // sense // intron // 4 /// ENST00000411744 // sense // intron // 4 /// ENST00000420116 // sense // intron // 2 /// ENST00000442951 // sense // intron // 3 /// ENST00000467929 // sense // intron // 3 /// ENS…	---	miRBase
MIMAT0027636_st	hsa-miR-6868-5p	-0.366047	0.216661	0.992346	0.839058	0.490865	1.00964	0.322426	0.526733	0.392264	MIMAT0027636	miRNA	Homo sapiens	chr17:74094131-74094152 (-)	22	ACUGGCAGAACACUGAAGCAGC	ENST00000332065 // sense // intron // 4 /// ENST00000335146 // sense // intron // 4 /// ENST00000357231 // sense // intron // 2 /// ENST00000405068 // sense // intron // 4 /// ENST00000405575 // sense // intron // 4 /// ENST00000411744 // sense // intron // 4 /// ENST00000420116 // sense // intron // 2 /// ENST00000442951 // sense // intron // 3 /// ENST00000467929 // sense // intron // 3 /// ENS…	---	miRBase
MIMAT0027638_st	hsa-miR-6869-5p	0.443922	0.128743	0.992346	6.77118	6.65155	6.57441	6.94482	7.06157	7.32252	MIMAT0027638	miRNA	Homo sapiens	chr20:1373584-1373605 (-)	22	GUGAGUAGUGGCGCGCGGCGGC	ENST00000381715 // sense // 5UTR // 1 /// ENST00000381719 // sense // intron // 1 /// ENST00000381724 // sense // 5UTR // 1 /// ENST00000400137 // sense // intron // 1 /// ENST00000439640 // sense // intron // 1 /// OTTHUMT00000077534 // sense // intron // 1 /// OTTHUMT00000077535 // sense // intron // 1 /// OTTHUMT00000077537 // sense // 5UTR // 1 /// OTTHUMT00000077538 // sense // 5UTR // 1	---	miRBase
MIMAT0027640_st	hsa-miR-6870-5p	0.250804	0.641537	0.992346	2.01809	3.5218	4.06607	3.37739	3.33631	3.64467	MIMAT0027640	miRNA	Homo sapiens	chr20:10630320-10630338 (-)	19	UGGGGGAGAUGGGGGUUGA	ENST00000254958 // sense // intron // 9 /// ENST00000423891 // sense // intron // 7	---	miRBase
MIMAT0027642_st	hsa-miR-6871-5p	0.0638683	0.925098	0.998769	2.77336	2.36412	0.63716	2.83505	1.07671	2.05449	MIMAT0027642	miRNA	Homo sapiens	chr20:39797668-39797689 (+)	22	CAUGGGAGUUCGGGGUGGUUGC	ENST00000244007 // sense // intron // 22 /// ENST00000373271 // sense // intron // 21 /// ENST00000373272 // sense // intron // 21 /// ENST00000477870 // sense // intron // 2 /// ENST00000483175 // sense // intron // 1 /// OTTHUMT00000080513 // sense // intron // 2 /// OTTHUMT00000080514 // sense // intron // 21 /// OTTHUMT00000268154 // sense // intron // 1 /// OTTHUMT00000276885 // sense // int…	---	miRBase
MIMAT0027646_st	hsa-miR-6873-5p	0.251114	0.532129	0.992346	0.211756	1.08094	1.05103	0.999089	1.54188	0.556088	MIMAT0027646	miRNA	Homo sapiens	chr6:33255040-33255061 (-)	22	CAGAGGGAAUACAGAGGGCAAU	ENST00000374617 // sense // intron // 8 /// ENST00000444176 // sense // intron // 7 /// ENST00000488944 // sense // exon // 2 /// ENST00000489905 // sense // intron // 1 /// OTTHUMT00000076382 // sense // intron // 8 /// OTTHUMT00000076384 // sense // intron // 1 /// OTTHUMT00000276301 // sense // intron // 7 /// OTTHUMT00000276303 // sense // exon // 2	hsa-mir-6834 // chr6:33258022-33258102 (+) /// hsa-mir-6873 // chr6:33255004-33255066 (-)	miRBase
MIMAT0027651_st	hsa-miR-6875-3p	-0.643148	0.0503579	0.992346	3.97908	4.30357	4.43627	3.8184	3.52922	3.44185	MIMAT0027651	miRNA	Homo sapiens	chr7:100465702-100465723 (+)	22	AUUCUUCCUGCCCUGGCUCCAU	ENST00000200457 // sense // intron // 2 /// ENST00000417475 // sense // intron // 2 /// ENST00000437505 // sense // intron // 1 /// ENST00000476870 // sense // intron // 2 /// ENST00000496260 // sense // exon // 2 /// OTTHUMT00000347151 // sense // intron // 2 /// OTTHUMT00000347153 // sense // intron // 2 /// OTTHUMT00000347154 // sense // intron // 2 /// OTTHUMT00000347156 // sense // exon // 2…	---	miRBase
MIMAT0027650_st	hsa-miR-6875-5p	0.804778	0.0644864	0.992346	0.371867	1.64854	1.00257	1.64854	1.97944	1.80933	MIMAT0027650	miRNA	Homo sapiens	chr7:100465663-100465683 (+)	21	UGAGGGACCCAGGACAGGAGA	ENST00000200457 // sense // intron // 2 /// ENST00000417475 // sense // intron // 2 /// ENST00000437505 // sense // intron // 1 /// ENST00000476870 // sense // intron // 2 /// ENST00000496260 // sense // exon // 2 /// OTTHUMT00000347151 // sense // intron // 2 /// OTTHUMT00000347153 // sense // intron // 2 /// OTTHUMT00000347154 // sense // intron // 2 /// OTTHUMT00000347156 // sense // exon // 2…	---	miRBase
MIMAT0027655_st	hsa-miR-6877-3p	-0.274508	0.605124	0.992346	3.21496	5.08055	4.79426	3.93642	3.88445	4.44538	MIMAT0027655	miRNA	Homo sapiens	chr9:135927422-135927442 (+)	21	CAGCCUCUGCCCUUGGCCUCC	ENST00000342018 // sense // intron // 4 /// ENST00000372095 // sense // intron // 3 /// ENST00000372097 // sense // intron // 4 /// ENST00000372099 // sense // intron // 5 /// ENST00000372108 // sense // intron // 4 /// ENST00000439697 // sense // intron // 3 /// ENST00000440319 // sense // intron // 4 /// OTTHUMT00000054826 // sense // intron // 4 /// OTTHUMT00000054827 // sense // intron // 4 /…	---	miRBase
MIMAT0027654_st	hsa-miR-6877-5p	0.412835	0.354948	0.992346	0.792337	1.09806	1.9398	1.88742	1.07992	2.10137	MIMAT0027654	miRNA	Homo sapiens	chr9:135927388-135927409 (+)	22	AGGGCCGAAGGGUGGAAGCUGC	ENST00000342018 // sense // intron // 4 /// ENST00000372095 // sense // intron // 3 /// ENST00000372097 // sense // intron // 4 /// ENST00000372099 // sense // intron // 5 /// ENST00000372108 // sense // intron // 4 /// ENST00000439697 // sense // intron // 3 /// ENST00000440319 // sense // intron // 4 /// OTTHUMT00000054826 // sense // intron // 4 /// OTTHUMT00000054827 // sense // intron // 4 /…	---	miRBase
MIMAT0027658_st	hsa-miR-6879-5p	0.194473	0.547356	0.992346	4.97	4.79545	4.1338	4.73681	4.86132	4.88454	MIMAT0027658	miRNA	Homo sapiens	chr11:64785982-64786003 (+)	22	CAGGGCAGGGAAGGUGGGAGAG	ENST00000246747 // sense // intron // 2 /// ENST00000301886 // sense // intron // 2 /// ENST00000524585 // sense // intron // 2 /// ENST00000529384 // sense // intron // 2 /// ENST00000533729 // sense // intron // 2 /// OTTHUMT00000385963 // sense // intron // 2 /// OTTHUMT00000385964 // sense // intron // 2 /// OTTHUMT00000385965 // sense // intron // 2 /// OTTHUMT00000385967 // sense // intron …	---	miRBase
MIMAT0027660_st	hsa-miR-6880-5p	0.143153	0.7939	0.992346	2.52592	3.67286	4.53491	3.72412	4.1723	3.26672	MIMAT0027660	miRNA	Homo sapiens	chr12:124821762-124821783 (-)	22	UGGUGGAGGAAGAGGGCAGCUC	ENST00000356219 // sense // intron // 38 /// ENST00000397355 // sense // intron // 37 /// ENST00000404121 // sense // intron // 37 /// ENST00000404621 // sense // intron // 37 /// ENST00000405201 // sense // intron // 37 /// ENST00000429285 // sense // intron // 37 /// ENST00000440187 // sense // intron // 3 /// OTTHUMT00000318169 // sense // intron // 37 /// OTTHUMT00000318170 // sense // intron…	---	miRBase
MIMAT0027666_st	hsa-miR-6883-5p	-0.330117	0.547226	0.992346	2.8285	2.72663	2.27965	2.8285	1.0691	2.94682	MIMAT0027666	miRNA	Homo sapiens	chr17:8048363-8048384 (-)	22	AGGGAGGGUGUGGUAUGGAUGU	ENST00000317276 // sense // intron // 17 /// ENST00000354903 // sense // intron // 17 /// ENST00000578089 // sense // intron // 2 /// ENST00000578950 // sense // exon // 1 /// ENST00000581082 // sense // intron // 16 /// ENST00000581395 // sense // intron // 15 /// ENST00000582719 // sense // intron // 17 /// ENST00000583559 // sense // intron // 1 /// OTTHUMT00000441481 // sense // intron // 17 …	---	miRBase
MIMAT0027673_st	hsa-miR-6886-3p	0.603461	0.253479	0.992346	0.0981053	1.668	0.458658	1.29969	1.92573	0.809722	MIMAT0027673	miRNA	Homo sapiens	chr19:11224187-11224207 (+)	21	UGCCCUUCUCUCCUCCUGCCU	ENST00000252444 // sense // intron // 9 /// ENST00000455727 // sense // intron // 7 /// ENST00000535915 // sense // intron // 8 /// ENST00000545707 // sense // intron // 8 /// ENST00000557933 // sense // intron // 9 /// ENST00000558013 // sense // intron // 9 /// ENST00000558518 // sense // intron // 9 /// ENST00000559340 // sense // intron // 1 /// ENST00000560173 // sense // exon // 3 /// ENST0…	---	miRBase
MIMAT0027674_st	hsa-miR-6887-5p	0.026418	0.944523	0.998769	0.722782	1.78635	1.8858	1.53931	1.41661	1.51826	MIMAT0027674	miRNA	Homo sapiens	chr19:35613609-35613631 (+)	23	UGGGGGGACAGAUGGAGAGGACA	ENST00000344013 // sense // intron // 5 /// ENST00000346446 // sense // intron // 4 /// ENST00000406242 // sense // intron // 5 /// ENST00000406988 // sense // intron // 4 /// ENST00000435734 // sense // intron // 6 /// ENST00000535103 // sense // intron // 5 /// ENST00000603181 // sense // intron // 6 /// ENST00000603524 // sense // 3UTR // 6 /// ENST00000604255 // sense // intron // 6 /// ENST0…	---	miRBase
MIMAT0027678_st	hsa-miR-6889-5p	-0.118877	0.771675	0.992346	1.71654	2.30693	2.59979	2.58337	1.45202	2.23123	MIMAT0027678	miRNA	Homo sapiens	chr22:41649027-41649049 (-)	23	UCGGGGAGUCUGGGGUCCGGAAU	ENST00000356244 // sense // intron // 11 /// ENST00000405486 // sense // intron // 12 /// ENST00000407260 // sense // intron // 10 /// ENST00000455915 // sense // intron // 10 /// OTTHUMT00000320603 // sense // intron // 11 /// OTTHUMT00000320605 // sense // intron // 12 /// OTTHUMT00000320606 // sense // intron // 10	---	miRBase
MIMAT0027680_st	hsa-miR-6890-5p	0.10353	0.797535	0.992346	0.249997	1.39923	0.161532	0.91365	0.670741	0.536955	MIMAT0027680	miRNA	Homo sapiens	chr3:49137322-49137342 (-)	21	CAUGGGGUAGGGCAGAGUAGG	ENST00000306125 // sense // intron // 14 /// ENST00000414533 // sense // intron // 14 /// ENST00000430182 // sense // intron // 14 /// ENST00000464962 // sense // intron // 13 /// ENST00000478561 // sense // exon // 4 /// ENST00000482468 // sense // intron // 3 /// OTTHUMT00000345689 // sense // intron // 14 /// OTTHUMT00000345691 // sense // intron // 14 /// OTTHUMT00000345693 // sense // intron…	---	miRBase
MIMAT0027682_st	hsa-miR-6891-5p	-0.130859	0.71533	0.992346	5.29035	5.55907	4.71082	4.65304	5.10062	5.414	MIMAT0027682	miRNA	Homo sapiens	chr6:31323074-31323092 (-)	19	UAAGGAGGGGGAUGAGGGG	ENST00000412585 // sense // intron // 4 /// ENST00000463574 // sense // intron // 1 /// OTTHUMT00000076280 // sense // intron // 4 /// OTTHUMT00000258074 // sense // intron // 1	---	miRBase
MIMAT0027684_st	hsa-miR-6892-5p	-0.282964	0.496974	0.992346	0.0927941	1.20229	0.772354	0.960127	0.129212	0.129212	MIMAT0027684	miRNA	Homo sapiens	chr7:143079779-143079799 (+)	21	GUAAGGGACCGGAGAGUAGGA	ENST00000322764 // sense // intron // 4 /// ENST00000354434 // sense // intron // 2 /// ENST00000392910 // sense // intron // 3 /// ENST00000449423 // sense // intron // 2 /// ENST00000449630 // sense // intron // 3 /// ENST00000468083 // sense // intron // 3 /// ENST00000477373 // sense // intron // 1 /// OTTHUMT00000156296 // sense // intron // 4 /// OTTHUMT00000156297 // sense // intron // 3 /…	---	miRBase
MIMAT0027686_st	hsa-miR-6893-5p	0.227613	0.78424	0.992346	2.8532	3.10912	1.09381	3.5894	0.95048	3.19909	MIMAT0027686	miRNA	Homo sapiens	chr8:145660977-145660997 (-)	21	CAGGCAGGUGUAGGGUGGAGC	ENST00000409379 // sense // intron // 17 /// ENST00000497613 // sense // intron // 9 /// ENST00000544423 // antisense // intron // 1 /// OTTHUMT00000329668 // sense // intron // 17 /// OTTHUMT00000329951 // sense // intron // 9	---	miRBase
MIMAT0027688_st	hsa-miR-6894-5p	-0.163779	0.710105	0.992346	1.6953	2.70029	2.04966	2.11908	1.28833	2.5465	MIMAT0027688	miRNA	Homo sapiens	chrX:53228099-53228122 (-)	24	AGGAGGAUGGAGAGCUGGGCCAGA	ENST00000375379 // sense // intron // 15 /// ENST00000375383 // sense // intron // 14 /// ENST00000375401 // sense // intron // 15 /// ENST00000404049 // sense // intron // 15 /// ENST00000452825 // sense // intron // 13 /// ENST00000497100 // sense // intron // 6 /// OTTHUMT00000056737 // sense // intron // 15 /// OTTHUMT00000056738 // sense // intron // 15 /// OTTHUMT00000056739 // sense // int…	hsa-mir-6894 // chrX:53228071-53228127 (-) /// hsa-mir-6895 // chrX:53224593-53224670 (-)	miRBase
MIMAT0028109_st	hsa-miR-7106-5p	0.370189	0.321858	0.992346	0.443093	1.32736	0.967492	1.67762	0.904484	1.26641	MIMAT0028109	miRNA	Homo sapiens	chr12:113596958-113596977 (-)	20	UGGGAGGAGGGGAUCUUGGG	ENST00000306014 // sense // intron // 19 /// ENST00000314045 // sense // intron // 19 /// ENST00000335621 // antisense // exon // 8 /// ENST00000549271 // sense // intron // 1 /// ENST00000551912 // sense // intron // 1 /// OTTHUMT00000405303 // antisense // exon // 8 /// OTTHUMT00000405374 // sense // intron // 19 /// OTTHUMT00000405435 // sense // intron // 19 /// OTTHUMT00000405437 // sense //…	---	miRBase
MIMAT0028111_st	hsa-miR-7107-5p	-0.253634	0.482515	0.992346	7.27299	6.88317	6.1984	6.64568	6.33256	6.61543	MIMAT0028111	miRNA	Homo sapiens	chr12:121882129-121882150 (-)	22	UCGGCCUGGGGAGGAGGAAGGG	ENST00000377069 // sense // intron // 15 /// ENST00000377071 // sense // intron // 15 /// ENST00000536437 // sense // intron // 12 /// ENST00000538243 // sense // intron // 4 /// ENST00000538503 // sense // intron // 10 /// ENST00000542973 // sense // intron // 5 /// ENST00000543025 // sense // intron // 12 /// OTTHUMT00000402128 // sense // intron // 5 /// OTTHUMT00000402130 // sense // intron /…	---	miRBase
MIMAT0028113_st	hsa-miR-7108-5p	0.088198	0.782477	0.992346	5.20697	5.83817	5.17158	5.54812	5.22874	5.70446	MIMAT0028113	miRNA	Homo sapiens	chr19:2434978-2434998 (-)	21	GUGUGGCCGGCAGGCGGGUGG	ENST00000325327 // sense // intron // 5 /// ENST00000490554 // sense // exon // 1 /// ENST00000527409 // sense // intron // 2 /// ENST00000582871 // sense // intron // 5 /// OTTHUMT00000319205 // sense // intron // 5 /// OTTHUMT00000319207 // sense // exon // 1 /// OTTHUMT00000384489 // sense // intron // 2	---	miRBase
MIMAT0028115_st	hsa-miR-7109-5p	-0.147861	0.712993	0.992346	3.55494	4.35658	3.63135	3.6227	3.18851	4.28808	MIMAT0028115	miRNA	Homo sapiens	chr22:32017492-32017512 (-)	21	CUGGGGGGAGGAGACCCUGCU	ENST00000266095 // sense // exon // 6 /// ENST00000336566 // sense // exon // 5 /// ENST00000382151 // sense // exon // 5 /// ENST00000397500 // sense // exon // 5 /// ENST00000422020 // sense // exon // 5 /// ENST00000435900 // sense // exon // 5 /// ENST00000437808 // sense // 3UTR // 4 /// ENST00000439502 // sense // exon // 5 /// ENST00000460723 // sense // exon // 4 /// ENST00000473770 // se…	---	miRBase
MIMAT0012734_st	hsa-miR-711	0.0417471	0.929664	0.998769	0.333815	1.6514	0.49813	0.323702	0.838399	1.44649	MIMAT0012734	miRNA	Homo sapiens	chr3:48616347-48616368 (-)	22	GGGACCCAGGGAGAGACGUAAG	ENST00000328333 // sense // intron // 62 /// ENST00000454817 // sense // intron // 62 /// ENST00000487017 // sense // intron // 28 /// OTTHUMT00000257519 // sense // intron // 62 /// OTTHUMT00000313513 // sense // intron // 28	---	miRBase
MIMAT0028117_st	hsa-miR-7110-5p	0.0695688	0.836695	0.992346	9.4677	9.47767	8.63649	9.4434	9.10575	9.24142	MIMAT0028117	miRNA	Homo sapiens	chr3:122880646-122880666 (+)	21	UGGGGGUGUGGGGAGAGAGAG	ENST00000316218 // sense // intron // 16 /// ENST00000467157 // sense // exon // 5 /// ENST00000469649 // sense // intron // 3 /// ENST00000489923 // sense // intron // 15 /// OTTHUMT00000356192 // sense // intron // 16 /// OTTHUMT00000356193 // sense // intron // 15 /// OTTHUMT00000356194 // sense // exon // 5 /// OTTHUMT00000356383 // sense // intron // 3	---	miRBase
MIMAT0028119_st	hsa-miR-7111-5p	-0.74339	0.145656	0.992346	2.991	2.90849	1.99666	2.14537	1.06952	2.45109	MIMAT0028119	miRNA	Homo sapiens	chr6:35438286-35438307 (+)	22	UGGGGGAGGAAGGACAGGCCAU	ENST00000322203 // sense // intron // 5 /// ENST00000464112 // sense // intron // 4 /// ENST00000467020 // sense // intron // 4 /// ENST00000478340 // sense // intron // 5 /// ENST00000490335 // sense // intron // 4 /// OTTHUMT00000040283 // sense // intron // 5 /// OTTHUMT00000040284 // sense // intron // 4 /// OTTHUMT00000040285 // sense // intron // 4 /// OTTHUMT00000040286 // sense // intron …	---	miRBase
MIMAT0028123_st	hsa-miR-7113-5p	-0.277881	0.688666	0.992346	2.8023	1.31026	0.0944136	1.59108	0.526733	1.25553	MIMAT0028123	miRNA	Homo sapiens	chr11:67800332-67800352 (+)	21	UCCAGGGAGACAGUGUGUGAG	ENST00000313468 // sense // intron // 3 /// ENST00000432321 // sense // intron // 3 /// ENST00000453471 // sense // intron // 4 /// ENST00000525419 // sense // intron // 1 /// ENST00000525628 // sense // intron // 3 /// ENST00000526339 // sense // intron // 3 /// ENST00000526446 // sense // intron // 3 /// ENST00000528492 // sense // intron // 1 /// ENST00000529645 // sense // intron // 2 /// ENS…	hsa-mir-4691 // chr11:67801364-67801448 (+) /// hsa-mir-7113 // chr11:67800331-67800389 (+)	miRBase
MIMAT0028125_st	hsa-miR-7114-5p	-0.680917	0.160652	0.992346	5.27087	5.03329	4.72853	4.97676	3.42144	4.59174	MIMAT0028125	miRNA	Homo sapiens	chr9:140344513-140344533 (-)	21	UCUGUGGAGUGGGGUGCCUGU	ENST00000265663 // sense // intron // 12 /// ENST00000339554 // sense // intron // 10 /// ENST00000371472 // sense // intron // 12 /// ENST00000371473 // sense // intron // 12 /// ENST00000371474 // sense // intron // 11 /// ENST00000371475 // sense // intron // 13 /// ENST00000371482 // sense // intron // 6 /// ENST00000392812 // sense // intron // 12 /// ENST00000437259 // sense // intron // 12…	---	miRBase
MIMAT0028211_st	hsa-miR-7150	-0.183168	0.489524	0.992346	5.26705	5.35769	5.18112	4.96694	5.06034	5.22907	MIMAT0028211	miRNA	Homo sapiens	chr9:126247863-126247880 (-)	18	CUGGCAGGGGGAGAGGUA	ENST00000373618 // sense // intron // 12 /// ENST00000373620 // sense // intron // 13 /// ENST00000373624 // sense // intron // 13 /// ENST00000394215 // sense // intron // 12 /// ENST00000394219 // sense // intron // 11 /// ENST00000473039 // sense // intron // 11 /// ENST00000491650 // sense // intron // 3 /// ENST00000497135 // sense // intron // 2 /// ENST00000542603 // sense // intron // 4 /…	---	miRBase
MIMAT0028218_st	hsa-miR-7154-5p	0.133343	0.830346	0.992346	0.334028	1.27049	2.7827	1.59225	1.97944	1.21555	MIMAT0028218	miRNA	Homo sapiens	chr11:45713304-45713326 (-)	23	UUCAUGAACUGGGUCUAGCUUGG	---	---	miRBase
MIMAT0028230_st	hsa-miR-7160-5p	0.092035	0.834727	0.992346	0.651281	1.68305	2.01018	2.00137	1.18437	1.43488	MIMAT0028230	miRNA	Homo sapiens	chr8:2024669-2024689 (+)	21	UGCUGAGGUCCGGGCUGUGCC	ENST00000262113 // sense // intron // 11 /// ENST00000523438 // sense // intron // 1 /// OTTHUMT00000251249 // sense // intron // 11 /// OTTHUMT00000374603 // sense // intron // 1	---	miRBase
MIMAT0028232_st	hsa-miR-7161-5p	0.587722	0.182053	0.992346	0.242673	0.115706	0.355859	0.376477	0.426044	1.67488	MIMAT0028232	miRNA	Homo sapiens	chr6:159030739-159030761 (+)	23	UAAAGACUGUAGAGGCAACUGGU	ENST00000367090 // sense // intron // 10 /// ENST00000403590 // antisense // exon // 2 /// OTTHUMT00000042872 // antisense // exon // 2 /// OTTHUMT00000042873 // sense // intron // 10	---	miRBase
MIMAT0004945_st	hsa-miR-744-5p	0.425915	0.300338	0.992346	1.21575	0.7268	1.32881	1.90561	0.804031	1.83947	MIMAT0004945	miRNA	Homo sapiens	chr17:11985226-11985247 (+)	22	UGCGGGGCUAGGGCUAACAGCA	ENST00000353533 // sense // intron // 3 /// ENST00000415385 // sense // intron // 4 /// ENST00000538465 // sense // intron // 1 /// ENST00000579089 // sense // intron // 1 /// ENST00000581941 // sense // intron // 2 /// ENST00000582183 // sense // intron // 1 /// ENST00000582897 // sense // intron // 3 /// ENST00000602305 // sense // intron // 1 /// ENST00000602375 // sense // intron // 2 /// ENS…	---	miRBase
MIMAT0004957_st	hsa-miR-760	-0.00461278	0.993738	0.998769	2.12828	1.85159	1.04525	2.6332	0.517876	1.86019	MIMAT0004957	miRNA	Homo sapiens	chr1:94312436-94312455 (+)	20	CGGCUCUGGGUCUGUGGGGA	ENST00000370244 // antisense // intron // 1 /// OTTHUMT00000028420 // antisense // intron // 1	---	miRBase
MIMAT0010313_st	hsa-miR-762	-0.159926	0.541161	0.992346	8.17058	8.34214	8.42664	8.10249	8.19597	8.16112	MIMAT0010313	miRNA	Homo sapiens	chr16:30905272-30905293 (+)	22	GGGGCUGGGGCCGGGGCCGAGC	ENST00000215115 // antisense // 5UTR // 1 /// ENST00000380317 // antisense // 5UTR // 1 /// ENST00000564901 // sense // intron // 2 /// ENST00000565573 // sense // intron // 2 /// ENST00000570025 // sense // intron // 1 /// ENST00000572471 // antisense // intron // 1 /// ENST00000572628 // antisense // 5UTR // 1 /// ENST00000574418 // antisense // 5UTR // 1 /// OTTHUMT00000255547 // antisense // …	---	miRBase
MIMAT0029782_st	hsa-miR-7641	0.274664	0.841957	0.992346	5.05648	0.443559	0.400114	3.75814	0.71924	2.24676	MIMAT0029782	miRNA	Homo sapiens	chr11:104123325-104123343 (+)	19	UUGAUCUCGGAAGCUAAGC	ENST00000516442 // sense // exon // 1 /// ENST00000238667 // sense // intron // 1 /// ENST00000364226 // sense // exon // 1 /// ENST00000554496 // sense // intron // 1 /// ENST00000555385 // sense // intron // 1 /// OTTHUMT00000413672 // sense // intron // 1 /// OTTHUMT00000413673 // sense // intron // 1 /// OTTHUMT00000414439 // sense // intron // 1	---	miRBase
MIMAT0022714_st	hsa-miR-766-5p	-0.310154	0.450763	0.992346	2.67287	3.0591	1.72431	2.32108	1.93871	2.26603	MIMAT0022714	miRNA	Homo sapiens	chrX:118780762-118780783 (-)	22	AGGAGGAAUUGGUGCUGGUCUU	ENST00000343984 // sense // intron // 5 /// ENST00000354228 // sense // intron // 5 /// ENST00000354416 // sense // intron // 5 /// ENST00000360156 // sense // intron // 5 /// ENST00000394610 // sense // intron // 5 /// ENST00000394616 // sense // intron // 5 /// ENST00000394617 // sense // intron // 6 /// ENST00000460411 // sense // intron // 5 /// ENST00000489216 // sense // intron // 5 /// OTT…	---	miRBase
MIMAT0030019_st	hsa-miR-7704	0.383115	0.213927	0.992346	7.10086	7.21389	7.38879	7.36557	7.95563	7.53169	MIMAT0030019	miRNA	Homo sapiens	chr2:177053571-177053589 (+)	19	CGGGGUCGGCGGCGACGUG	ENST00000331462 // sense // 3UTR // 1 /// ENST00000413969 // antisense // exon // 1 /// OTTHUMT00000255693 // sense // 3UTR // 1 /// OTTHUMT00000334221 // antisense // exon // 1	---	miRBase
MIMAT0030419_st	hsa-miR-7844-5p	-0.482346	0.660204	0.992346	5.97912	4.18481	3.16619	5.60791	1.81193	4.46325	MIMAT0030419	miRNA	Homo sapiens	chr12:94965082-94965103 (-)	22	AAAACUAGGACUGUGUGGUGUA	ENST00000261226 // sense // 3UTR // 4 /// ENST00000551457 // sense // 3UTR // 4 /// OTTHUMT00000408113 // sense // 3UTR // 4 /// OTTHUMT00000408114 // sense // 3UTR // 4	hsa-mir-5700 // chr12:94955565-94955635 (+) /// hsa-mir-7844 // chr12:94965007-94965128 (-)	miRBase
MIMAT0030420_st	hsa-miR-7845-5p	0.356292	0.447423	0.992346	3.5971	3.70309	2.33639	3.44837	3.20741	4.04968	MIMAT0030420	miRNA	Homo sapiens	chr2:208031126-208031146 (+)	21	AAGGGACAGGGAGGGUCGUGG	ENST00000421199 // antisense // intron // 1 /// ENST00000423015 // antisense // intron // 1 /// ENST00000457962 // antisense // intron // 1 /// OTTHUMT00000336783 // antisense // intron // 1 /// OTTHUMT00000336784 // antisense // intron // 1 /// OTTHUMT00000336785 // antisense // intron // 1	---	miRBase
MIMAT0030421_st	hsa-miR-7846-3p	-0.422063	0.426197	0.992346	1.45124	2.72663	0.801068	1.25669	0.902872	1.55319	MIMAT0030421	miRNA	Homo sapiens	chr1:12227067-12227087 (+)	21	CAGCGGAGCCUGGAGAGAAGG	ENST00000376259 // sense // 3UTR // 1 /// ENST00000492361 // sense // exon // 1 /// ENST00000536782 // sense // 3UTR // 1 /// OTTHUMT00000005133 // sense // 3UTR // 1 /// OTTHUMT00000005134 // sense // exon // 1	---	miRBase
MIMAT0030422_st	hsa-miR-7847-3p	0.344049	0.377929	0.992346	3.86509	4.18261	3.16081	4.01057	4.49202	3.73807	MIMAT0030422	miRNA	Homo sapiens	chr11:1901335-1901355 (+)	21	CGUGGAGGACGAGGAGGAGGC	ENST00000311604 // sense // 3UTR // 2 /// ENST00000381775 // sense // 3UTR // 3 /// ENST00000405957 // sense // 3UTR // 2 /// ENST00000406638 // sense // 3UTR // 2 /// ENST00000417766 // sense // 3UTR // 2 /// ENST00000418975 // sense // 3UTR // 2 /// ENST00000421485 // sense // 3UTR // 2 /// ENST00000429923 // sense // 3UTR // 2 /// ENST00000432093 // sense // 3UTR // 2 /// ENST00000446808 // se…	---	miRBase
MIMAT0030425_st	hsa-miR-7850-5p	-0.347943	0.628128	0.992346	1.66774	2.12163	2.47898	2.88258	0.0944136	2.24753	MIMAT0030425	miRNA	Homo sapiens	chr19:2630721-2630741 (+)	21	GUUUGGACAUAGUGUGGCUGG	ENST00000382159 // antisense // intron // 2 /// ENST00000587867 // antisense // intron // 2 /// OTTHUMT00000451345 // antisense // intron // 2 /// OTTHUMT00000451346 // antisense // intron // 2	---	miRBase
MIMAT0030426_st	hsa-miR-7851-3p	0.739291	0.112848	0.992346	0.491278	0.556927	0.48261	1.86164	0.371867	1.51518	MIMAT0030426	miRNA	Homo sapiens	chr12:42717542-42717563 (-)	22	UACCUGGGAGACUGAGGUUGGA	ENST00000266529 // sense // intron // 2 /// ENST00000549190 // antisense // intron // 1 /// ENST00000552235 // sense // intron // 1 /// ENST00000552673 // sense // intron // 2 /// OTTHUMT00000403813 // sense // intron // 2 /// OTTHUMT00000403814 // sense // intron // 2 /// OTTHUMT00000403815 // sense // intron // 1 /// OTTHUMT00000404039 // antisense // intron // 1	---	miRBase
MIMAT0030427_st	hsa-miR-7852-3p	-0.796511	0.045048	0.992346	1.3446	2.01577	1.27686	0.388734	0.806409	1.05256	MIMAT0030427	miRNA	Homo sapiens	chr1:108439904-108439925 (+)	22	UAUGUAGUAGUCAAAGGCAUUU	ENST00000370056 // antisense // intron // 1 /// ENST00000371846 // antisense // intron // 1 /// ENST00000469325 // antisense // intron // 1 /// ENST00000490388 // antisense // intron // 1 /// ENST00000527011 // antisense // intron // 1 /// ENST00000530671 // antisense // intron // 1 /// OTTHUMT00000030242 // antisense // intron // 1 /// OTTHUMT00000030244 // antisense // intron // 1 /// OTTHUMT00…	---	miRBase
MIMAT0030430_st	hsa-miR-7855-5p	0.840272	0.156081	0.992346	0.387199	1.48061	1.08904	1.50382	2.91287	1.06097	MIMAT0030430	miRNA	Homo sapiens	chr14:65252381-65252402 (-)	22	UUGGUGAGGACCCCAAGCUCGG	ENST00000389720 // sense // exon // 17 /// ENST00000389721 // sense // exon // 17 /// ENST00000389722 // sense // exon // 17 /// ENST00000542895 // sense // exon // 18 /// ENST00000556626 // sense // exon // 18 /// OTTHUMT00000414076 // sense // exon // 18 /// OTTHUMT00000414080 // sense // exon // 17 /// OTTHUMT00000421243 // sense // exon // 17	---	miRBase
MIMAT0031176_st	hsa-miR-7973	0.156226	0.54559	0.992346	0.15237	0.0179774	0.00930902	0.209203	0.286763	0.15237	MIMAT0031176	miRNA	Homo sapiens	chr15:51606231-51606250 (+)	20	UGUGACCCUAGAAUAAUUAC	ENST00000260433 // antisense // intron // 1 /// ENST00000396402 // antisense // intron // 1 /// ENST00000396404 // antisense // intron // 2 /// ENST00000405011 // antisense // intron // 1 /// ENST00000439712 // antisense // intron // 1 /// ENST00000453807 // antisense // intron // 1 /// ENST00000492852 // antisense // intron // 3 /// ENST00000557858 // antisense // intron // 1 /// ENST00000557934…	hsa-mir-7973-1 // chr15:51606231-51606306 (+) /// hsa-mir-7973-2 // chr15:51606229-51606304 (-) /// hsa-mir-7973-1 // chr15:51606231-51606306 (+) /// hsa-mir-7973-2 // chr15:51606229-51606304 (-)	miRBase
MIMAT0031178_st	hsa-miR-7975	0.0730875	0.84354	0.992346	1.30152	0.13036	0.466736	0.565543	0.716378	0.835958	MIMAT0031178	miRNA	Homo sapiens	chr19:55634593-55634610 (-)	18	AUCCUAGUCACGGCACCA	---	---	miRBase
MIMAT0031180_st	hsa-miR-7977	0.932578	0.17273	0.992346	0.213228	0.874422	1.86574	1.44595	3.11691	1.18826	MIMAT0031180	miRNA	Homo sapiens	chr3:176232891-176232908 (+)	18	UUCCCAGCCAACGCACCA	---	---	miRBase
MIMAT0030979_st	hsa-miR-8052	0.493101	0.10867	0.992346	0.430207	0.151625	0.0742771	0.470632	0.825722	0.839058	MIMAT0030979	miRNA	Homo sapiens	chr11:130536640-130536661 (+)	22	CGGGACUGUAGAGGGCAUGAGC	---	---	miRBase
MIMAT0030990_st	hsa-miR-8063	-1.27069	0.00969491	0.992346	2.57489	2.51294	2.66086	1.04711	2.04693	0.842575	MIMAT0030990	miRNA	Homo sapiens	chr15:37265032-37265053 (-)	22	UCAAAAUCAGGAGUCGGGGCUU	ENST00000219869 // sense // intron // 7 /// ENST00000314177 // sense // intron // 8 /// ENST00000338564 // sense // intron // 9 /// ENST00000340545 // sense // intron // 8 /// ENST00000382766 // sense // intron // 8 /// ENST00000397620 // sense // intron // 8 /// ENST00000397624 // sense // intron // 7 /// ENST00000424352 // sense // intron // 8 /// ENST00000444725 // sense // intron // 8 /// ENS…	---	miRBase
MIMAT0030991_st	hsa-miR-8064	0.141441	0.657695	0.992346	0.349563	0.508516	-0.0182813	0.717582	0.0380222	0.508516	MIMAT0030991	miRNA	Homo sapiens	chr3:52880539-52880558 (-)	20	AGCACACUGAGCGAGCGGAC	ENST00000355083 // sense // intron // 4 /// ENST00000504329 // sense // intron // 4 /// OTTHUMT00000352949 // sense // intron // 4 /// OTTHUMT00000362140 // sense // intron // 4	---	miRBase
MIMAT0030996_st	hsa-miR-8069	0.158836	0.577472	0.992346	6.61793	6.92347	6.88337	6.70145	7.02838	7.17146	MIMAT0030996	miRNA	Homo sapiens	chr21:15096563-15096585 (+)	23	GGAUGGUUGGGGGCGGUCGGCGU	---	---	miRBase
MIMAT0030998_st	hsa-miR-8071	0.398369	0.328724	0.992346	5.90598	6.08542	5.14217	6.65051	5.75252	5.92565	MIMAT0030998	miRNA	Homo sapiens	chr14:106087488-106087507 (+)	20	CGGUGGACUGGAGUGGGUGG	---	---	miRBase
MIMAT0030999_st	hsa-miR-8072	0.21059	0.4599	0.992346	6.15341	6.52743	6.53158	6.43556	6.62078	6.78785	MIMAT0030999	miRNA	Homo sapiens	chr12:123849361-123849380 (-)	20	GGCGGCGGGGAGGUAGGCAG	ENST00000602398 // sense // 5UTR // 1 /// ENST00000602750 // sense // 5UTR // 1 /// ENST00000602918 // antisense // exon // 1 /// OTTHUMT00000467683 // sense // 5UTR // 1 /// OTTHUMT00000467684 // sense // 5UTR // 1 /// OTTHUMT00000467685 // antisense // exon // 1	---	miRBase
MIMAT0031001_st	hsa-miR-8074	0.202101	0.599547	0.992346	0.103082	0.718005	1.07856	0.718005	0.47875	1.30919	MIMAT0031001	miRNA	Homo sapiens	chr19:51710195-51710218 (-)	24	CUAUGGCGAGACUGGCAUGUACUC	---	---	miRBase
MIMAT0031002_st	hsa-miR-8075	0.105949	0.795909	0.992346	6.30257	6.72031	7.60051	6.69828	7.32115	6.92181	MIMAT0031002	miRNA	Homo sapiens	chr13:113917280-113917303 (+)	24	UGCUGAUGGCAGAUGUCGGGUCUG	ENST00000326335 // sense // intron // 19 /// ENST00000375440 // sense // intron // 19 /// ENST00000375441 // sense // intron // 19 /// ENST00000451881 // sense // intron // 19 /// ENST00000472083 // sense // intron // 4 /// OTTHUMT00000045887 // sense // intron // 19 /// OTTHUMT00000045888 // sense // intron // 19 /// OTTHUMT00000045895 // sense // intron // 4	---	miRBase
MIMAT0031006_st	hsa-miR-8079	-0.271491	0.521999	0.992346	0.911466	1.40414	0.901913	1.48499	0.078999	0.839058	MIMAT0031006	miRNA	Homo sapiens	chr13:44770307-44770326 (-)	20	CAGUGAUCGUCUCUGCUGGC	ENST00000437867 // antisense // intron // 2 /// OTTHUMT00000044732 // antisense // intron // 2	---	miRBase
MIMAT0031011_st	hsa-miR-8084	1.07133	0.313092	0.992346	-0.286725	2.89115	3.98476	2.88355	3.2065	3.71312	MIMAT0031011	miRNA	Homo sapiens	chr8:94041989-94042011 (+)	23	GAAUACUAAGUAAAAAAUCAGUA	---	---	miRBase
MIMAT0031012_st	hsa-miR-8085	-0.660744	0.168498	0.992346	4.1896	4.02726	3.6759	4.08537	2.4834	3.34175	MIMAT0031012	miRNA	Homo sapiens	chr19:45261924-45261944 (+)	21	UGGGAGAGAGGACUGUGAGGC	ENST00000164227 // sense // intron // 7 /// ENST00000403534 // sense // exon // 7 /// ENST00000444487 // sense // intron // 6 /// ENST00000473473 // sense // exon // 1 /// ENST00000474300 // sense // intron // 2 /// OTTHUMT00000322976 // sense // intron // 7 /// OTTHUMT00000322978 // sense // exon // 7 /// OTTHUMT00000322980 // sense // intron // 6 /// OTTHUMT00000322981 // sense // intron // 2 /…	---	miRBase
MIMAT0031016_st	hsa-miR-8089	-0.643141	0.10861	0.992346	4.12224	4.32907	3.58464	3.70349	2.84026	3.56278	MIMAT0031016	miRNA	Homo sapiens	chr5:180470413-180470436 (-)	24	CCUGGGGACAGGGGAUUGGGGCAG	ENST00000327705 // antisense // intron // 1 /// ENST00000376841 // antisense // intron // 1 /// ENST00000376842 // antisense // intron // 1 /// ENST00000491209 // antisense // intron // 1 /// ENST00000513424 // antisense // intron // 1 /// ENST00000515271 // antisense // intron // 1 /// OTTHUMT00000157342 // antisense // intron // 1 /// OTTHUMT00000157343 // antisense // intron // 1 /// OTTHUMT00…	---	miRBase
MIMAT0004949_st	hsa-miR-877-5p	0.0116354	0.980345	0.998769	2.78379	3.55774	4.55678	3.42105	3.79028	3.72188	MIMAT0004949	miRNA	Homo sapiens	chr6:30552109-30552128 (+)	20	GUAGAGGAGAUGGCGCAGGG	ENST00000326195 // sense // intron // 13 /// ENST00000376545 // sense // intron // 12 /// ENST00000396515 // sense // intron // 4 /// ENST00000475993 // sense // intron // 5 /// OTTHUMT00000076136 // sense // intron // 12 /// OTTHUMT00000076137 // sense // intron // 13 /// OTTHUMT00000256168 // sense // intron // 5	---	miRBase
MIMAT0004948_st	hsa-miR-885-3p	-0.359547	0.54568	0.992346	1.04988	2.57707	2.26018	1.12977	1.03807	2.64065	MIMAT0004948	miRNA	Homo sapiens	chr3:10436183-10436204 (-)	22	AGGCAGCGGGGUGUAGUGGAUA	ENST00000343816 // sense // intron // 5 /// ENST00000352432 // sense // intron // 4 /// ENST00000360273 // sense // intron // 5 /// ENST00000383800 // sense // intron // 5 /// ENST00000397077 // sense // intron // 7 /// ENST00000452124 // sense // intron // 3 /// ENST00000460129 // sense // intron // 5 /// ENST00000480680 // sense // intron // 5 /// OTTHUMT00000250576 // sense // intron // 4 /// …	---	miRBase
MIMAT0004912_st	hsa-miR-890	0.0190314	0.953801	0.998769	0.662658	0.947985	0.57941	0.901913	0.251127	1.09411	MIMAT0004912	miRNA	Homo sapiens	chrX:145075839-145075859 (-)	21	UACUUGGAAAGGCAUCAGUUG	---	hsa-mir-892a // chrX:145078187-145078261 (-) /// hsa-mir-890 // chrX:145075793-145075869 (-) /// hsa-mir-891b // chrX:145082571-145082649 (-) /// hsa-mir-888 // chrX:145076302-145076378 (-) /// hsa-mir-892b // chrX:145078716-145078792 (-) /// hsa-mir-892c // chrX:145074268-145074344 (-)	miRBase
MIMAT0000092_st	hsa-miR-92a-3p	0.244716	0.64908	0.992346	3.3512	3.56046	3.38421	2.61008	4.74224	3.67769	MIMAT0000092	miRNA	Homo sapiens	chr13:92003615-92003636 (+) /// chrX:133303574-133303595 (-)	22	UAUUGCACUUGUCCCGGCCUGU	ENST00000385233 // sense // exon // 1 /// ENST00000400282 // sense // intron // 3 /// ENST00000581816 // sense // exon // 3 /// ENST00000582141 // sense // exon // 2 /// OTTHUMT00000045448 // sense // intron // 3 /// OTTHUMT00000442497 // sense // exon // 2 /// OTTHUMT00000442498 // sense // exon // 3	hsa-mir-17 // chr13:92002859-92002942 (+) /// hsa-mir-18a // chr13:92003005-92003075 (+) /// hsa-mir-19a // chr13:92003145-92003226 (+) /// hsa-mir-19b-1 // chr13:92003446-92003532 (+) /// hsa-mir-20a // chr13:92003319-92003389 (+) /// hsa-mir-92a-1 // chr13:92003568-92003645 (+) /// hsa-mir-19b-2 // chrX:133303701-133303796 (-) /// hsa-mir-92a-2 // chrX:133303568-133303642 (-) /// hsa-mir-106a /…	miRBase
MIMAT0004792_st	hsa-miR-92b-5p	0.266013	0.574841	0.992346	2.42038	3.83633	3.65593	3.54843	3.11433	4.04792	MIMAT0004792	miRNA	Homo sapiens	chr1:155164987-155165008 (+)	22	AGGGACGGGACGCGGUGCAGUG	---	---	miRBase
MIMAT0000093_st	hsa-miR-93-5p	0.393282	0.361916	0.992346	1.91542	2.54663	3.42718	2.98235	3.10159	2.98513	MIMAT0000093	miRNA	Homo sapiens	chr7:99691438-99691460 (-)	23	CAAAGUGCUGUUCGUGCAGGUAG	ENST00000303887 // sense // intron // 13 /// ENST00000343023 // sense // intron // 8 /// ENST00000354230 // sense // intron // 12 /// ENST00000485286 // sense // intron // 12 /// ENST00000489841 // sense // intron // 12 /// ENST00000491245 // sense // intron // 4 /// ENST00000493352 // sense // intron // 2 /// OTTHUMT00000336534 // sense // intron // 13 /// OTTHUMT00000336598 // sense // intron /…	hsa-mir-25 // chr7:99691183-99691266 (-) /// hsa-mir-93 // chr7:99691391-99691470 (-) /// hsa-mir-106b // chr7:99691616-99691697 (-)	miRBase
MIMAT0004976_st	hsa-miR-933	0.0430106	0.939655	0.998769	1.41661	2.54288	0.7252	0.786886	2.0474	1.97944	MIMAT0004976	miRNA	Homo sapiens	chr2:176032370-176032391 (-)	22	UGUGCGCAGGGAGACCUCUCCC	ENST00000264110 // sense // intron // 1 /// ENST00000345739 // sense // intron // 1 /// ENST00000392543 // sense // intron // 1 /// ENST00000392544 // sense // intron // 1 /// ENST00000409499 // sense // intron // 1 /// ENST00000409635 // sense // intron // 1 /// ENST00000409833 // sense // intron // 1 /// ENST00000413123 // sense // intron // 1 /// ENST00000415955 // sense // intron // 1 /// ENS…	---	miRBase
MIMAT0004979_st	hsa-miR-936	0.0892138	0.79651	0.992346	1.55719	2.00943	1.26846	2.06825	1.29353	1.74094	MIMAT0004979	miRNA	Homo sapiens	chr10:105807909-105807930 (-)	22	ACAGUAGAGGGAGGAAUCGCAG	ENST00000353479 // sense // exon // 30 /// ENST00000369733 // sense // exon // 30 /// OTTHUMT00000050181 // sense // exon // 30 /// OTTHUMT00000050183 // sense // exon // 30	---	miRBase
MIMAT0022938_st	hsa-miR-937-5p	0.180781	0.656426	0.992346	4.35884	4.34492	3.70443	4.75812	3.61546	4.57696	MIMAT0022938	miRNA	Homo sapiens	chr8:144895180-144895199 (-)	20	GUGAGUCAGGGUGGGGCUGG	ENST00000320476 // sense // exon // 8 /// ENST00000356994 // sense // exon // 8 /// ENST00000377533 // sense // exon // 8 /// OTTHUMT00000382214 // sense // exon // 8 /// OTTHUMT00000382215 // sense // exon // 8 /// OTTHUMT00000382220 // sense // exon // 8	---	miRBase
MIMAT0004982_st	hsa-miR-939-5p	-0.0229531	0.97611	0.998769	3.04205	3.88306	1.61403	3.31411	1.47415	3.68202	MIMAT0004982	miRNA	Homo sapiens	chr8:145619408-145619431 (-)	24	UGGGGAGCUGAGGCUCUGGGGGUG	ENST00000349769 // sense // exon // 34 /// ENST00000526271 // sense // exon // 3 /// ENST00000531480 // sense // exon // 3 /// ENST00000531727 // sense // exon // 2 /// ENST00000532725 // sense // exon // 1 /// ENST00000532935 // sense // exon // 4 /// OTTHUMT00000382422 // sense // exon // 34 /// OTTHUMT00000382423 // sense // exon // 1 /// OTTHUMT00000382424 // sense // exon // 3 /// OTTHUMT000…	hsa-mir-939 // chr8:145619364-145619445 (-) /// hsa-mir-1234 // chr8:145625476-145625559 (-) /// hsa-mir-6849 // chr8:145625671-145625739 (-)	miRBase
MIMAT0000095_st	hsa-miR-96-5p	0.210293	0.467599	0.992346	-0.0046917	0.103082	0.0942948	0.103082	0.6174	0.103082	MIMAT0000095	miRNA	Homo sapiens	chr7:129414579-129414601 (-)	23	UUUGGCACUAGCACAUUUUUGCU	---	hsa-mir-96 // chr7:129414532-129414609 (-) /// hsa-mir-182 // chr7:129410223-129410332 (-) /// hsa-mir-183 // chr7:129414745-129414854 (-)	miRBase
MIMAT0022842_st	hsa-miR-98-3p	0.478601	0.104219	0.992346	-0.215925	-0.215925	0.0944136	0.266985	0.481664	0.349717	MIMAT0022842	miRNA	Homo sapiens	chrX:53583202-53583223 (-)	22	CUAUACAACUUACUACUUUCCC	ENST00000262854 // sense // intron // 60 /// ENST00000342160 // sense // intron // 59 /// ENST00000427052 // sense // intron // 34 /// OTTHUMT00000056766 // sense // intron // 59 /// OTTHUMT00000056767 // sense // intron // 34	hsa-let-7f-2 // chrX:53584153-53584235 (-) /// hsa-mir-98 // chrX:53583184-53583302 (-)	miRBase
MIMAT0004678_st	hsa-miR-99b-3p	0.0967459	0.900055	0.998769	3.02394	1.30702	0.0944136	2.39623	0.902767	1.41661	MIMAT0004678	miRNA	Homo sapiens	chr19:52195909-52195930 (+)	22	CAAGCUCGUGUCUGUGGGUCCG	ENST00000602324 // antisense // intron // 1 /// OTTHUMT00000467329 // antisense // intron // 1	hsa-let-7e // chr19:52196039-52196117 (+) /// hsa-mir-125a // chr19:52196507-52196592 (+) /// hsa-mir-99b // chr19:52195865-52195934 (+)	miRBase
MIMAT0000689_st	hsa-miR-99b-5p	-0.70103	0.0471846	0.992346	1.1295	1.41661	1.72471	0.839058	0.42676	0.901913	MIMAT0000689	miRNA	Homo sapiens	chr19:52195871-52195892 (+)	22	CACCCGUAGAACCGACCUUGCG	ENST00000602324 // antisense // intron // 1 /// OTTHUMT00000467329 // antisense // intron // 1	hsa-let-7e // chr19:52196039-52196117 (+) /// hsa-mir-125a // chr19:52196507-52196592 (+) /// hsa-mir-99b // chr19:52195865-52195934 (+)	miRBase
